# Supplementary material for: Understanding the Influence of Donor‐Acceptor Diazo Compounds on the Catalyst Efficiency of B(C6F5)3 Towards Carbene Formation
Source: PubMed Central journal article supplement (PMC9303686; doi:10.1002/chem.202104376), 2022-01-27
Supplement: CHEM-28-0-s001.pdf [file CHEM-28-0-s001.pdf]

# Chemistry–A European Journal

Supporting Information

## Understanding the Influence of Donor-Acceptor Diazo Compounds on the Catalyst Efficiency of $B(C_6F_5)_3$ Towards Carbene Formation

Rasool Babaahmadi, Ayan Dasgupta, Christopher J. T. Hyland, Brian F. Yates, Rebecca L. Melen,\* and Alireza Ariafard\*

---

## Table of Content

---

|                                                                                                |   |
|------------------------------------------------------------------------------------------------|---|
| Catalyst poisoning and impact of the borane acidity on the catalyst efficiency                 | 2 |
| Correlation plot between $\Delta G_4^\ddagger$ and $\Delta G_4$ (Figure S2)                    | 4 |
| Correlations between $\Delta G_2$ and $r_{C^a-C^b}$ and between $\Delta G_4$ and $r_{C^a-C^b}$ | 4 |
| Cartesian coordinates and total energies for the calculated structures                         | 6 |

## Catalyst poisoning and impact of the borane acidity on the catalyst efficiency

Table S1 shows the free energy values for all species involved in the N<sub>2</sub> release from various diazo compounds with R' = OMe catalysed by B(C<sub>6</sub>F<sub>5</sub>)<sub>3</sub>. This table clearly shows that the boron catalyst binds to the diazo substrate in an endergonic manner with  $\Delta G_b$  values ranging from 0.9 kcal/mol for R = NH<sub>2</sub> to 5.8 kcal/mol for R = NO<sub>2</sub>. It follows that there is no catalyst poisoning caused by the coordination of the boron catalyst to the carbonyl group of the diazo molecule. This is also true when the borane coordinates to a R group with a strong electron donating feature such as OMe and NMe<sub>2</sub>. This claim is supported by the endergonicity calculated for transformations given in Figure S1.

Our calculations also indicate that the catalyst efficiency could be affected by the nature of the borane catalyst. As shown in Table S2, the use of a borane with a higher acidity decreases the activation barrier to the N<sub>2</sub> release process more significantly. Accordingly, the more acidic the boron catalyst, the lower the activation barrier to the N<sub>2</sub> release and the more favourable thermodynamically the carbene formation (Table S2).

**Table S1.** Calculated free energy values for all species involved in the N<sub>2</sub> release from various diazo compounds with R' = OMe catalyzed by B(C<sub>6</sub>F<sub>5</sub>)<sub>3</sub>.

| Entry | R                | $\Delta G_b$ | $\Delta G^{\ddagger}_2$ | $\Delta G_2$ |
|-------|------------------|--------------|-------------------------|--------------|
| 1     | NMe <sub>2</sub> | 0.9          | 15.4                    | -13.8        |
| 2     | NH <sub>2</sub>  | 1.5          | 16.5                    | -11.9        |
| 3     | OMe              | 2.5          | 21.1                    | -1.9         |
| 4     | Me               | 2.2          | 25.1                    | 5.9          |
| 5     | F                | 3.9          | 26.3                    | 6.1          |
| 6     | H                | 2.5          | 25.9                    | 6.5          |
| 7     | Cl               | 3.2          | 27.7                    | 9.8          |
| 8     | CF <sub>3</sub>  | 3.2          | 30.5                    | 14.2         |
| 9     | CN               | 4.7          | 32.2                    | 14.9         |
| 10    | NO <sub>2</sub>  | 5.8          | 34.3                    | 16.7         |

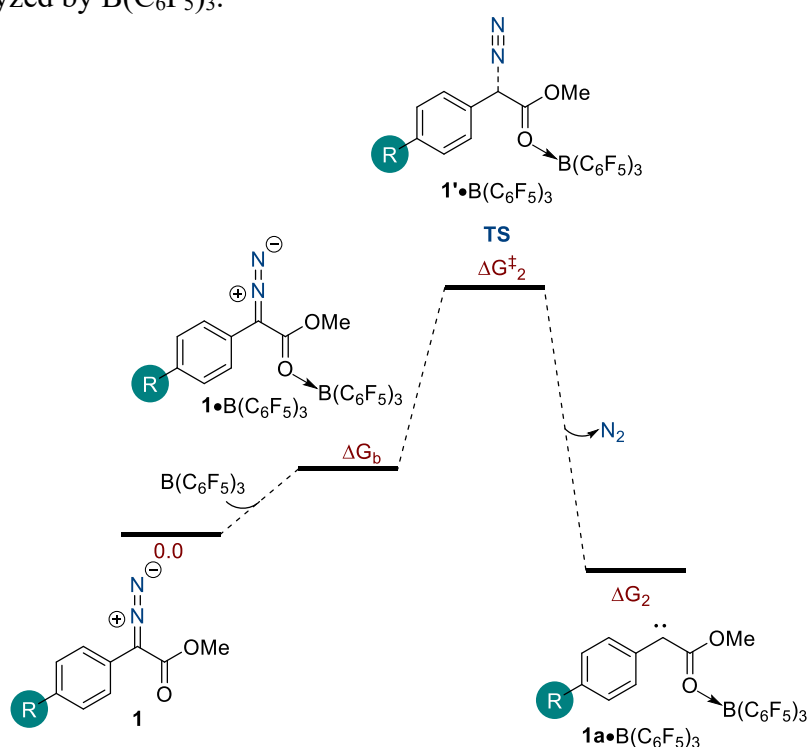

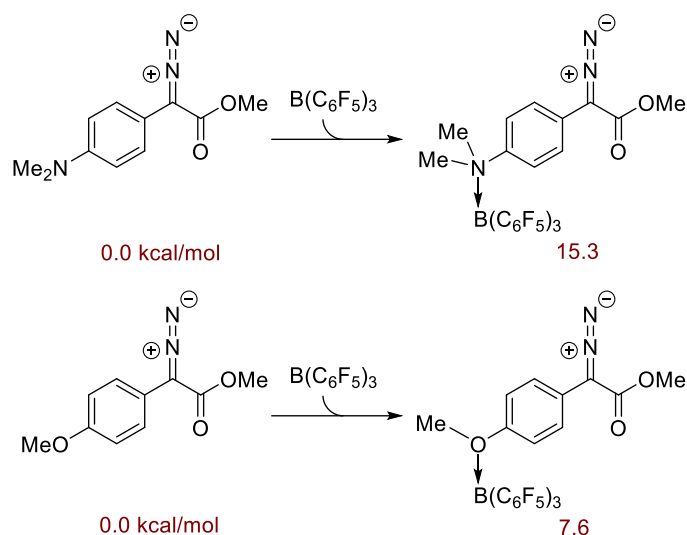

**Figure S1.** Calculated free energy for coordinating NMe<sub>2</sub> and OMe substituents to B(C<sub>6</sub>F<sub>5</sub>)<sub>3</sub>.

**Table S2.** Calculated free energies for carbene formation catalysed by different boron catalyst.

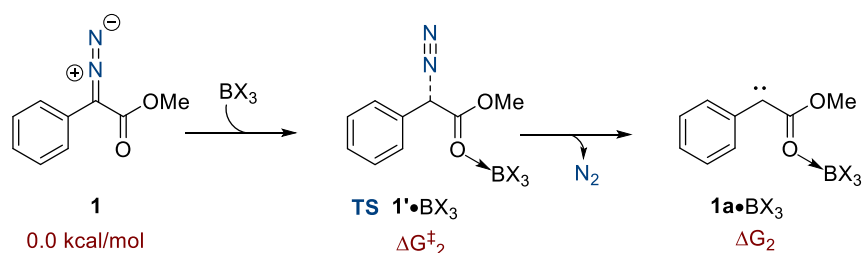

| Entry | X                                | ΔG <sup>‡</sup> <sub>2</sub> | ΔG <sub>2</sub> |
|-------|----------------------------------|------------------------------|-----------------|
| 1     | Cl                               | 21.2                         | 3.0             |
| 2     | H                                | 23.7                         | 4.5             |
| 3     | F                                | 24.3                         | 5.3             |
| 4     | (C <sub>6</sub> F <sub>5</sub> ) | 25.9                         | 6.5             |
| 5     | Ph                               | 38.8                         | 19.1            |

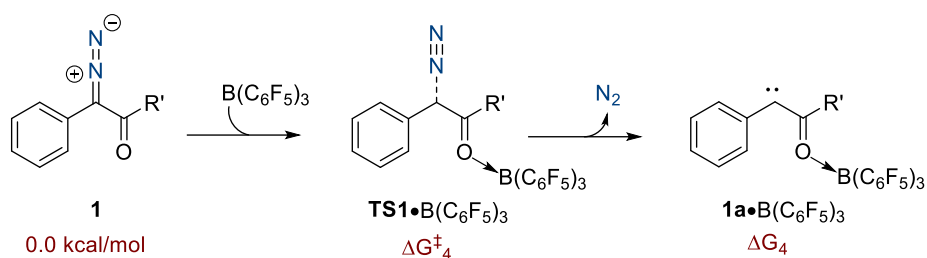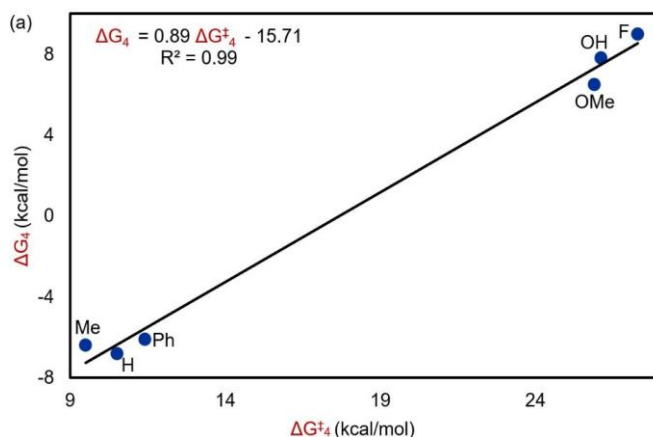

**Figure S2.** Correlation plot between  $\Delta G^\ddagger_4$  and  $\Delta G_4$  for  $B(C_6F_5)_3$ -catalyzed carbene formation with  $R' = H, Me, Ph, OMe, OH,$  and  $F$ .

**Correlations between  $\Delta G_2$  and  $r_{C^a-C^b}$  and between  $\Delta G_4$  and  $r_{C^a-C^b}$ .** We also explored to see whether there is any correlation between  $\Delta G_2$  and  $r_{C^a-C^b}$  as well as between  $\Delta G_4$  and  $r_{C^a-C^b}$ . We found a reasonable correlation with  $R^2 = 0.77$  between the Gibbs free energy of  $N_2$  release ( $\Delta G_2$ ) and  $r_{C^a-C^b}$  in the carbene stabilized by  $B(C_6F_5)_3$  (Figure S3). This moderate correlation demonstrates that both resonance structures  $1a' \cdot B(C_6F_5)_3$  and  $1a'' \cdot B(C_6F_5)_3$  should contribute to stabilization of the carbene in the presence of the boron catalyst. In contrast, the lack of a good correlation with  $R^2 = 0.21$  between  $\Delta G_4$  and  $r_{C^a-C^b}$  (Figure S4) suggests that a change in the  $R'$  group only changes the contribution of the resonance structure  $1a'' \cdot B(C_6F_5)_3$  and not  $1a' \cdot B(C_6F_5)_3$ .

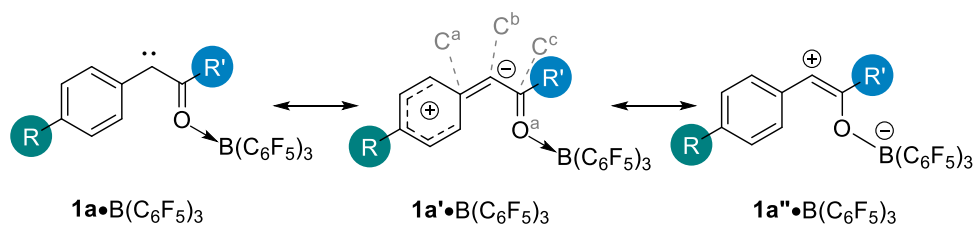

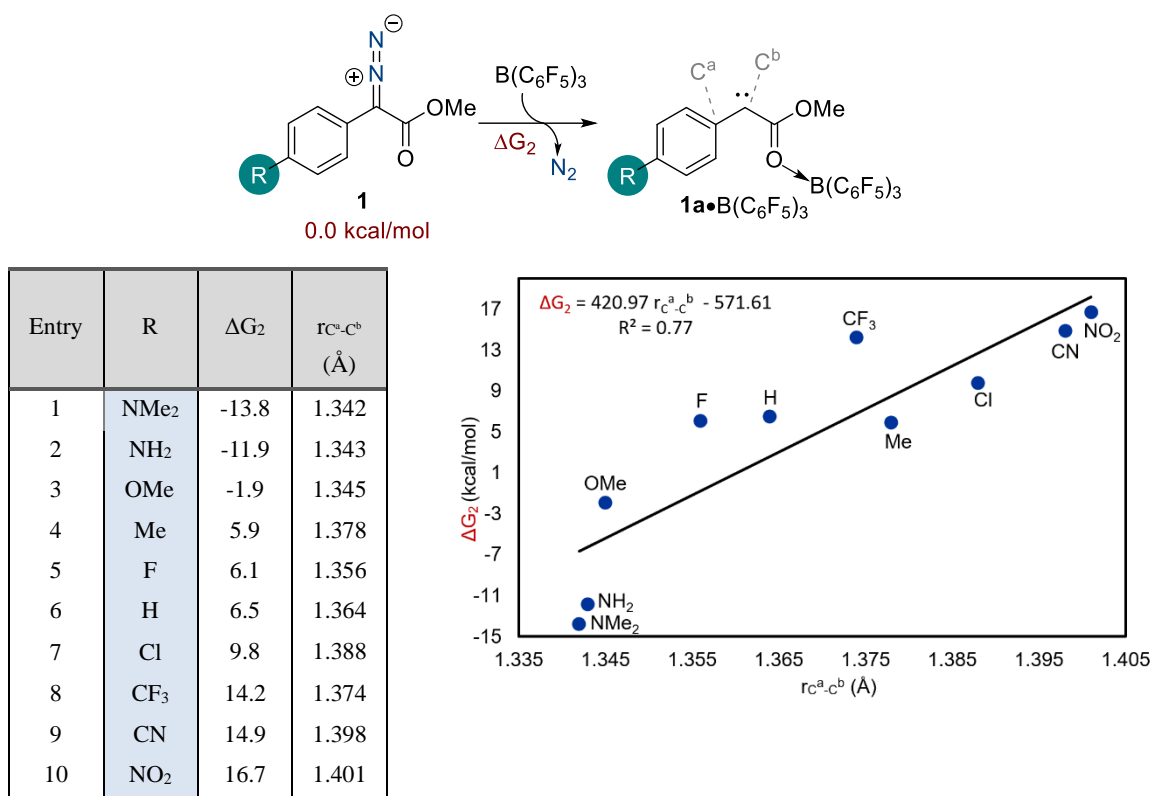

**Figure S3.** Correlation plot between  $\Delta G_2$  and  $r_{C^a-C^b}$  for  $B(C_6F_5)_3$ -catalyzed carbene formation with different R group while keeping  $R' = OMe$ .

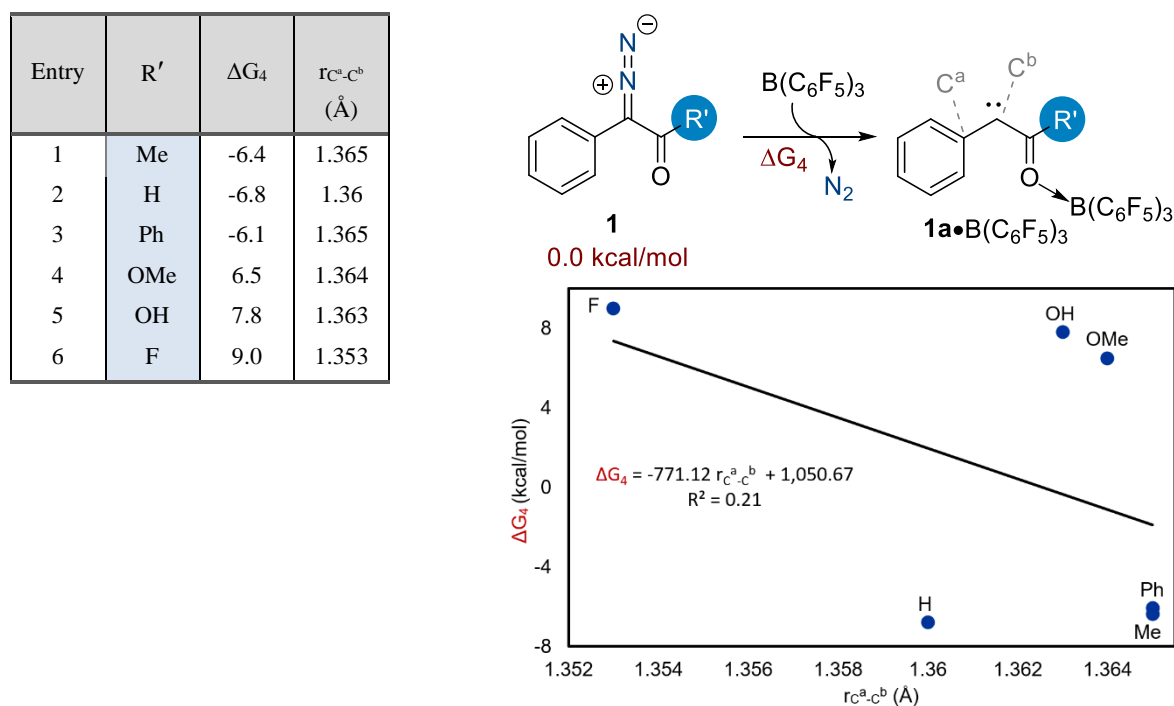

**Figure S4.** Correlation plot between  $\Delta G_4$  and  $r_{C^a-C^b}$  for  $B(C_6F_5)_3$ -catalyzed carbene formation with different  $R'$  group while keeping  $R = H$

**Table S3.** Cartesian coordinates and total energies for the calculated structures.

**1** (R = NMe<sub>2</sub>, R' = OMe)

E(SMD/M06-2X/6-31G(d)) = -741.3517888 au

H(SMD/M06-2X/6-31G(d)) = -741.100277 au

G(SMD/M06-2X/6-31G(d)) = -741.161867 au

E(SMD/M06-2X/def2-TZVP//SMD/M06-2X/6-31G(d)) = -741.6425442 au

|   |             |             |             |
|---|-------------|-------------|-------------|
| C | -1.72840400 | 0.42723100  | -0.07754000 |
| N | -2.20852800 | 1.64063400  | -0.22478600 |
| N | -2.60105100 | 2.69131500  | -0.34765000 |
| C | -0.26385400 | 0.25426400  | -0.06972800 |
| C | 0.32895000  | -0.98837700 | -0.32510400 |
| C | 0.58576100  | 1.33852100  | 0.18274400  |
| C | 1.70882600  | -1.13952500 | -0.32376700 |
| H | -0.29608600 | -1.85267100 | -0.51466200 |
| C | 1.96535400  | 1.19948800  | 0.17385600  |
| H | 0.16836900  | 2.31866200  | 0.40280400  |
| C | 2.57043800  | -0.04733000 | -0.09097200 |
| H | 2.11478800  | -2.12610500 | -0.51307700 |
| H | 2.57203000  | 2.07169700  | 0.38548000  |
| C | -2.73169400 | -0.62153000 | 0.10382800  |
| O | -2.47941500 | -1.79400600 | 0.28514700  |
| O | -3.98189000 | -0.13030000 | 0.04420600  |
| C | -5.02369600 | -1.09550200 | 0.21593400  |
| H | -5.95553700 | -0.53658800 | 0.14228700  |
| H | -4.97311500 | -1.85502000 | -0.56734200 |
| H | -4.94384700 | -1.57409300 | 1.19433300  |
| N | 3.94597200  | -0.18829800 | -0.12849700 |
| C | 4.76446100  | 0.88246000  | 0.41025900  |
| H | 4.54251200  | 1.09245700  | 1.46732500  |
| H | 5.81448200  | 0.60036200  | 0.32549100  |
| H | 4.62172100  | 1.80595000  | -0.15987500 |
| C | 4.50392300  | -1.52809300 | -0.11874500 |
| H | 4.19071700  | -2.08562000 | -1.00693100 |
| H | 5.59200600  | -1.45668600 | -0.14007100 |
| H | 4.20726500  | -2.10310300 | 0.77134900  |

**1** (R = NH<sub>2</sub>, R' = OMe)

E(SMD/M06-2X/6-31G(d)) = -662.7793238 au

H(SMD/M06-2X/6-31G(d)) = -662.588176 au

G(SMD/M06-2X/6-31G(d)) = -662.642734 au

E(SMD/M06-2X/def2-TZVP//SMD/M06-2X/6-31G(d)) = -663.0469861 au

|   |             |             |             |
|---|-------------|-------------|-------------|
| C | 0.94723900  | 0.41782400  | -0.05628500 |
| N | 1.36404100  | 1.65748300  | -0.17617100 |
| N | 1.70127200  | 2.72941100  | -0.27517800 |
| C | -0.50715100 | 0.17418200  | -0.01854600 |
| C | -1.04135700 | -1.09339700 | -0.28771800 |

|   |             |             |             |
|---|-------------|-------------|-------------|
| C | -1.39794700 | 1.21770400  | 0.26790200  |
| C | -2.41316300 | -1.30547600 | -0.26039700 |
| H | -0.37816500 | -1.91889200 | -0.51533900 |
| C | -2.76921500 | 1.00977000  | 0.28260300  |
| H | -1.01955400 | 2.21369300  | 0.48630900  |
| C | -3.30397800 | -0.26034100 | 0.02213500  |
| H | -2.80730200 | -2.29734100 | -0.46693000 |
| H | -3.43930300 | 1.83527900  | 0.50822900  |
| C | 2.00466700  | -0.58538000 | 0.06685300  |
| O | 1.81446200  | -1.77430700 | 0.21322100  |
| O | 3.22723200  | -0.03058800 | -0.00276700 |
| C | 4.31890300  | -0.94756000 | 0.11585200  |
| H | 5.22014400  | -0.34034600 | 0.04443500  |
| H | 4.28245200  | -1.46217700 | 1.07840100  |
| H | 4.28998100  | -1.68166400 | -0.69235500 |
| N | -4.67458100 | -0.48993400 | 0.10622300  |
| H | -5.24643100 | 0.32965600  | -0.06632800 |
| H | -4.99849300 | -1.28172300 | -0.43856700 |

1 (R = OMe , R' = OMe)

E(SMD/M06-2X/6-31G(d)) = -721.9211765 au

H(SMD/M06-2X/6-31G(d)) = -721.712349 au

G(SMD/M06-2X/6-31G(d)) = -721.769653 au

E(SMD/M06-2X/def2-TZVP//SMD/M06-2X /6-31G(d)) = -722.2094288 au

|   |             |             |             |
|---|-------------|-------------|-------------|
| C | -1.34496200 | 0.41390400  | 0.06490700  |
| N | -1.72347400 | 1.66725100  | 0.17693300  |
| N | -2.02944200 | 2.74802000  | 0.27202400  |
| C | 0.10130100  | 0.12559600  | 0.05009800  |
| C | 0.58742300  | -1.16630000 | 0.31184100  |
| C | 1.02652700  | 1.14101900  | -0.20776900 |
| C | 1.94909300  | -1.41959000 | 0.30367100  |
| H | -0.10622400 | -1.97222700 | 0.51549000  |
| C | 2.39757100  | 0.89569400  | -0.20530500 |
| H | 0.68458900  | 2.15057500  | -0.42224300 |
| C | 2.86705100  | -0.39442000 | 0.04787000  |
| H | 2.32716900  | -2.41768800 | 0.50226500  |
| H | 3.08039900  | 1.71205500  | -0.40954900 |
| C | -2.43257600 | -0.55453000 | -0.07660600 |
| O | -2.27901100 | -1.74912900 | -0.21837300 |
| O | -3.63618900 | 0.04135000  | -0.03113300 |
| C | -4.75628200 | -0.83864600 | -0.16751800 |
| H | -5.63754000 | -0.20138300 | -0.11090900 |
| H | -4.72120500 | -1.35450700 | -1.12941700 |
| H | -4.76495900 | -1.57263100 | 0.64113500  |
| O | 4.17689400  | -0.74625300 | 0.06659400  |
| C | 5.12901300  | 0.26888100  | -0.19934500 |
| H | 6.10623500  | -0.21120400 | -0.14138700 |



H 4.99009000 0.69144400 -1.20118300  
H 5.07334200 1.07127600 0.54532700

**1** (R = Me , R' = OMe)

E(SMD/M06-2X/6-31G(d)) = -646.7401709 au

H(SMD/M06-2X/6-31G(d)) = -646.537515 au

G(SMD/M06-2X/6-31G(d)) = -646.594206 au

E(SMD/M06-2X/def2-TZVP//SMD/M06-2X /6-31G(d)) = -646.9939794 au

C 0.95708800 0.40503100 -0.00245900  
N 1.37580100 1.65277200 -0.00465100  
N 1.71471300 2.72665600 -0.00649100  
C -0.49813800 0.16913600 -0.00292000  
C -1.02835000 -1.12833500 -0.01617200  
C -1.39155800 1.25152600 0.00494300  
C -2.40684800 -1.32129000 -0.01945200  
H -0.36366300 -1.98209700 -0.02718600  
C -2.76376800 1.04060100 0.00104400  
H -1.02034700 2.27284500 0.01059600  
C -3.30169900 -0.24987200 -0.00825400  
H -2.79344300 -2.33762400 -0.03309100  
H -3.43092000 1.89928300 0.00387100  
C 2.02587100 -0.59596500 0.00313200  
O 1.85526100 -1.79651300 0.00792100  
O 3.23990000 -0.01977100 0.00250800  
C 4.34526400 -0.92876700 0.00799900  
H 5.23715100 -0.30392200 0.00640400  
H 4.32009200 -1.55400200 0.90302000  
H 4.32241800 -1.56190500 -0.88152600  
C -4.79136900 -0.47114400 0.01846200  
H -5.31750800 0.30588200 -0.54397900  
H -5.17287700 -0.44639700 1.04603900  
H -5.05475300 -1.44330700 -0.40751600

**1** (R = F , R' = OMe)

E(SMD/M06-2X/6-31G(d)) = -706.6475084 au

H(SMD/M06-2X/6-31G(d)) = -706.481851 au

G(SMD/M06-2X/6-31G(d)) = -706.535606 au

E(SMD/M06-2X/def2-TZVP//SMD/M06-2X /6-31G(d)) = -706.9356438 au

C -0.92007400 0.40909500 0.00020800  
N -1.33237800 1.65892700 0.00015000  
N -1.66874700 2.73343200 0.00011300  
C 0.53360200 0.16394100 0.00008000  
C 1.04963500 -1.14088000 0.00004300  
C 1.43177100 1.24291700 -0.00001000  
C 2.42395400 -1.35718900 -0.00007900  
H 0.37593600 -1.98718400 0.00011100  
C 2.80466600 1.03358000 -0.00013200  
H 1.06718500 2.26589200 0.00001500

|   |             |             |             |
|---|-------------|-------------|-------------|
| C | 3.27902600  | -0.26834500 | -0.00016400 |
| H | 2.83219800  | -2.36234700 | -0.00010700 |
| H | 3.50161000  | 1.86478000  | -0.00020100 |
| C | -1.99312800 | -0.58756300 | 0.00035800  |
| O | -1.82601100 | -1.78869800 | 0.00015400  |
| O | -3.20394300 | -0.00674200 | 0.00001500  |
| C | -4.31348400 | -0.91131200 | -0.00023500 |
| H | -5.20251500 | -0.28251100 | -0.00047400 |
| H | -4.29157000 | -1.54038600 | -0.89260000 |
| H | -4.29200900 | -1.54033300 | 0.89217800  |
| F | 4.60898400  | -0.47848500 | -0.00028200 |

**1** (R = H , R' = OMe)

E(SMD/M06-2X/6-31G(d)) = -607.4428884 au

H(SMD/M06-2X/6-31G(d)) = -607.269705 au

G(SMD/M06-2X/6-31G(d)) = -607.321306 au

E(SMD/M06-2X/def2-TZVP//SMD/M06-2X /6-31G(d)) = -607.6830308 au

|   |             |             |             |
|---|-------------|-------------|-------------|
| C | 0.49784700  | 0.38998100  | -0.00015200 |
| N | 0.84709000  | 1.65948200  | -0.00007700 |
| N | 1.13074000  | 2.74874800  | 0.00000000  |
| C | -0.94166400 | 0.07353700  | -0.00010300 |
| C | -1.39154800 | -1.25520500 | 0.00006200  |
| C | -1.89242700 | 1.10677100  | -0.00013600 |
| C | -2.75635800 | -1.53044400 | 0.00020600  |
| H | -0.67468000 | -2.06553200 | 0.00010800  |
| C | -3.25196700 | 0.81918900  | -0.00000800 |
| H | -1.57626500 | 2.14637100  | -0.00024900 |
| C | -3.69477400 | -0.50204200 | 0.00017000  |
| H | -3.08398100 | -2.56590700 | 0.00036400  |
| H | -3.96682700 | 1.63660900  | -0.00003400 |
| H | -4.75697100 | -0.72552200 | 0.00027300  |
| C | 1.62220200  | -0.54891800 | -0.00011600 |
| O | 1.52083100  | -1.75718800 | -0.00055500 |
| O | 2.80087500  | 0.09609100  | 0.00041200  |
| C | 3.95705300  | -0.74762500 | 0.00020100  |
| H | 4.81135200  | -0.07230200 | 0.00068400  |
| H | 3.96920000  | -1.37744600 | 0.89225800  |
| H | 3.96952700  | -1.37657100 | -0.89246600 |

**1** (R = Cl , R' = OMe)

E(SMD/M06-2X/6-31G(d)) = -1067.014275 au

H(SMD/M06-2X/6-31G(d)) = -1066.849697 au

G(SMD/M06-2X/6-31G(d)) = -1066.905033 au

E(SMD/M06-2X/def2-TZVP//SMD/M06-2X /6-31G(d)) = -1067.287815 au

|   |             |            |            |
|---|-------------|------------|------------|
| C | -1.33908500 | 0.41177600 | 0.00024400 |
| N | -1.78954600 | 1.64952800 | 0.00015800 |
| N | -2.15880000 | 2.71226000 | 0.00002300 |
| C | 0.11887800  | 0.21389600 | 0.00011500 |

|    |             |             |             |
|----|-------------|-------------|-------------|
| C  | 0.67651100  | -1.07312000 | 0.00006000  |
| C  | 0.98340200  | 1.31978300  | 0.00004400  |
| C  | 2.05663400  | -1.24571400 | -0.00006200 |
| H  | 0.03171900  | -1.94175000 | 0.00011500  |
| C  | 2.36154400  | 1.15246800  | -0.00008000 |
| H  | 0.58932000  | 2.33209100  | 0.00008800  |
| C  | 2.88896500  | -0.13378100 | -0.00013200 |
| H  | 2.47776800  | -2.24567100 | -0.00010200 |
| H  | 3.01721300  | 2.01672200  | -0.00013500 |
| C  | -2.38079300 | -0.61837600 | 0.00040600  |
| O  | -2.17519200 | -1.81322700 | 0.00021200  |
| O  | -3.60805700 | -0.07492300 | 0.00005000  |
| C  | -4.69041900 | -1.01237200 | -0.00019700 |
| H  | -5.59754100 | -0.41003500 | -0.00045000 |
| H  | -4.64949300 | -1.64024500 | -0.89266300 |
| H  | -4.64994700 | -1.64018500 | 0.89233000  |
| Cl | 4.62538500  | -0.35209400 | -0.00029100 |

**1** (R = CF<sub>3</sub>, R' = OMe)

E(SMD/M06-2X/6-31G(d)) = -944.3819053 au

H(SMD/M06-2X/6-31G(d)) = -944.201138 au

G(SMD/M06-2X/6-31G(d)) = -944.259779 au

E(SMD/M06-2X/def2-TZVP//SMD/M06-2X/6-31G(d)) = -944.7764732 au

|   |             |             |             |
|---|-------------|-------------|-------------|
| C | 1.98783700  | 0.41642400  | -0.00669600 |
| N | 2.46766700  | 1.64450500  | 0.00220600  |
| N | 2.86428700  | 2.69631100  | 0.00928600  |
| C | 0.52766100  | 0.25559200  | -0.01797100 |
| C | -0.05836700 | -1.02034300 | -0.03019700 |
| C | -0.30851100 | 1.38462100  | -0.01901700 |
| C | -1.44057400 | -1.15376200 | -0.04025900 |
| H | 0.56856900  | -1.90162100 | -0.03412500 |
| C | -1.68827100 | 1.24520600  | -0.02800600 |
| H | 0.11300300  | 2.38578200  | -0.01523200 |
| C | -2.25717500 | -0.02609700 | -0.03918600 |
| H | -1.88220900 | -2.14549600 | -0.05296800 |
| H | -2.31937600 | 2.12804000  | -0.03126000 |
| C | 3.00635000  | -0.63780300 | 0.00069600  |
| O | 2.77404300  | -1.82742400 | -0.00360400 |
| O | 4.24457700  | -0.12122400 | 0.01316300  |
| C | 5.30687400  | -1.08173600 | 0.02251700  |
| H | 6.22647600  | -0.49873900 | 0.02931600  |
| H | 5.24540600  | -1.70743700 | 0.91528300  |
| H | 5.25966900  | -1.70922500 | -0.86983400 |
| C | -3.74497200 | -0.18585000 | 0.00800300  |
| F | -4.38488100 | 0.87193800  | -0.51570700 |
| F | -4.19985200 | -0.32280900 | 1.26806700  |
| F | -4.15630100 | -1.27416600 | -0.66318200 |

**1** (R = CN , R' = OMe)

E(SMD/M06-2X/6-31G(d)) = -699.6626854 au

H(SMD/M06-2X/6-31G(d)) = -699.489103 au

G(SMD/M06-2X/6-31G(d)) = -699.545081 au

E(SMD/M06-2X/def2-TZVP//SMD/M06-2X /6-31G(d)) = -699.9374204 au

|   |             |             |             |
|---|-------------|-------------|-------------|
| C | 1.19534000  | 0.40320800  | 0.00021000  |
| N | 1.64135800  | 1.64554200  | 0.00025400  |
| N | 2.00956800  | 2.70690100  | 0.00025300  |
| C | -0.25683900 | 0.20319100  | 0.00011100  |
| C | -0.80880700 | -1.08914400 | 0.00053000  |
| C | -1.12292800 | 1.31143300  | -0.00022600 |
| C | -2.18450100 | -1.26280800 | 0.00042000  |
| H | -0.15849700 | -1.95321300 | 0.00085900  |
| C | -2.49607200 | 1.13969300  | -0.00030900 |
| H | -0.72766000 | 2.32279800  | -0.00034900 |
| C | -3.03523300 | -0.15228600 | -0.00002600 |
| H | -2.60293000 | -2.26394600 | 0.00068000  |
| H | -3.15316700 | 2.00295200  | -0.00059300 |
| C | 2.24331100  | -0.62309700 | -0.00014200 |
| O | 2.04269200  | -1.81816900 | -0.00032000 |
| O | 3.46557900  | -0.07174400 | -0.00022800 |
| C | 4.55550300  | -1.00144600 | -0.00011600 |
| H | 5.45773900  | -0.39198000 | -0.00031100 |
| H | 4.51891800  | -1.62890600 | 0.89272400  |
| H | 4.51878300  | -1.62927300 | -0.89269600 |
| C | -4.45945500 | -0.33486900 | -0.00012100 |
| N | -5.60824900 | -0.48135600 | -0.00021000 |

**1** (R = NO<sub>2</sub> , R' = OMe)

E(SMD/M06-2X/6-31G(d)) = -811.8736413 au

H(SMD/M06-2X/6-31G(d)) = -811.695066 au

G(SMD/M06-2X/6-31G(d)) = -811.753158 au

E(SMD/M06-2X/def2-TZVP//SMD/M06-2X /6-31G(d)) = -812.2028104 au

|   |             |             |             |
|---|-------------|-------------|-------------|
| C | 1.59835900  | 0.41344400  | -0.00732100 |
| N | 2.06179900  | 1.65014800  | -0.02495600 |
| N | 2.44695900  | 2.70472200  | -0.04054800 |
| C | 0.14564600  | 0.23392800  | -0.00175100 |
| C | -0.42192200 | -1.05237600 | -0.03150900 |
| C | -0.70615000 | 1.35431300  | 0.03121800  |
| C | -1.79921700 | -1.21064400 | -0.02953000 |
| H | 0.21761700  | -1.92388300 | -0.05616000 |
| C | -2.08152600 | 1.20146200  | 0.03179900  |
| H | -0.29807000 | 2.36020100  | 0.05951500  |
| C | -2.61142900 | -0.08387700 | 0.00107400  |
| H | -2.24173200 | -2.19925800 | -0.05297700 |
| H | -2.73731100 | 2.06332800  | 0.05691700  |
| C | 2.63260100  | -0.62755400 | 0.00949700  |

|   |             |             |             |
|---|-------------|-------------|-------------|
| O | 2.41489300  | -1.81921800 | 0.03071300  |
| O | 3.86148100  | -0.09267800 | -0.00031600 |
| C | 4.93952100  | -1.03646400 | 0.01622900  |
| H | 5.84941700  | -0.43866000 | 0.00591900  |
| H | 4.89440000  | -1.64770700 | 0.91979100  |
| H | 4.89451900  | -1.67885100 | -0.86552100 |
| N | -4.06111200 | -0.25292700 | 0.00128100  |
| O | -4.75577100 | 0.75056300  | 0.02207100  |
| O | -4.50655800 | -1.38893600 | -0.01948700 |

**I'** (R = NMe<sub>2</sub>, R' = OMe)

E(SMD/M06-2X/6-31G(d)) = -741.3027561 au

H(SMD/M06-2X/6-31G(d)) = -741.05419 au

G(SMD/M06-2X/6-31G(d)) = -741.116547 au

E(SMD/M06-2X/def2-TZVP//SMD/M06-2X/6-31G(d)) = -741.5962532 au

|   |             |             |             |
|---|-------------|-------------|-------------|
| C | -1.70966600 | 0.53812900  | -0.59698300 |
| N | -2.25336200 | 1.74601400  | 0.72638500  |
| N | -2.39647400 | 2.79612800  | 1.03758800  |
| C | -0.31292200 | 0.30120000  | -0.36837200 |
| C | 0.63294700  | 1.23290300  | -0.85249400 |
| C | 0.19542900  | -0.83223400 | 0.31066700  |
| C | 1.98832800  | 1.06177300  | -0.68104900 |
| H | 0.26600100  | 2.11133900  | -1.37737800 |
| C | 1.54555500  | -1.03879100 | 0.47564800  |
| H | -0.50174800 | -1.57372300 | 0.69237800  |
| C | 2.48902300  | -0.08980000 | -0.01235800 |
| H | 2.67199800  | 1.80596600  | -1.07019900 |
| H | 1.88658700  | -1.92966800 | 0.98872100  |
| C | -2.67298100 | -0.53993100 | -0.44653900 |
| O | -2.55964300 | -1.56851300 | -1.09662200 |
| O | -3.75998800 | -0.27601700 | 0.30729100  |
| C | -4.77961200 | -1.27454200 | 0.25801300  |
| H | -5.57061400 | -0.92049200 | 0.91877800  |
| H | -5.16085900 | -1.38866000 | -0.75959500 |
| H | -4.39765200 | -2.23590200 | 0.60943600  |
| N | 3.82074600  | -0.27968000 | 0.15260200  |
| C | 4.31331300  | -1.46582600 | 0.83436100  |
| H | 3.94260500  | -1.51519200 | 1.86451500  |
| H | 4.01028100  | -2.38023500 | 0.31130700  |
| H | 5.40147800  | -1.43011400 | 0.86227000  |
| C | 4.76767500  | 0.69582900  | -0.36317700 |
| H | 4.61578100  | 1.67901400  | 0.09700300  |
| H | 5.77875600  | 0.36142000  | -0.13476300 |
| H | 4.67553800  | 0.80299200  | -1.45014200 |

**I'** (R = NH<sub>2</sub>, R' = OMe)

E(SMD/M06-2X/6-31G(d)) = -662.7290712 au

H(SMD/M06-2X/6-31G(d)) = -662.541439 au

G(SMD/M06-2X/6-31G(d)) = -662.59738 au

E(SMD/M06-2X/def2-TZVP//SMD/M06-2X /6-31G(d)) = -662.9994334 au

|   |             |             |             |
|---|-------------|-------------|-------------|
| C | 0.91985500  | 0.44587800  | 0.65168400  |
| N | 1.42965900  | 1.84343800  | -0.49629900 |
| N | 1.53355700  | 2.92925300  | -0.66821300 |
| C | -0.45530300 | 0.16707000  | 0.34544500  |
| C | -1.46142100 | 0.98524600  | 0.90922400  |
| C | -0.87613500 | -0.89880700 | -0.48744300 |
| C | -2.79934500 | 0.76733400  | 0.66567700  |
| H | -1.15489200 | 1.80795800  | 1.55000500  |
| C | -2.20867400 | -1.14728700 | -0.72391500 |
| H | -0.12634400 | -1.54831900 | -0.93139800 |
| C | -3.20132500 | -0.31272800 | -0.15455000 |
| H | -3.55837700 | 1.40746300  | 1.10615900  |
| H | -2.51753500 | -1.97748600 | -1.35308100 |
| C | 1.94596300  | -0.55178800 | 0.39524500  |
| O | 1.87415200  | -1.65877700 | 0.90748200  |
| O | 3.03315400  | -0.13708000 | -0.28581600 |
| C | 4.10594600  | -1.07876800 | -0.33368400 |
| H | 4.89128100  | -0.60017000 | -0.91821800 |
| H | 4.46818100  | -1.30421400 | 0.67219600  |
| H | 3.78700700  | -2.00471300 | -0.81798400 |
| N | -4.51628900 | -0.56874300 | -0.36349500 |
| H | -5.20563000 | 0.12496500  | -0.10598500 |
| H | -4.78799800 | -1.22316500 | -1.08506600 |

**1'** (R = OMe , R' = OMe)

E(SMD/M06-2X/6-31G(d)) = -721.8675325 au

H(SMD/M06-2X/6-31G(d)) = -721.661926 au

G(SMD/M06-2X/6-31G(d)) = -721.720547 au

E(SMD/M06-2X/def2-TZVP//SMD/M06-2X /6-31G(d)) = -722.1584724 au

|   |             |             |             |
|---|-------------|-------------|-------------|
| C | 1.31639900  | 0.43268600  | 0.70148300  |
| N | 1.80106000  | 1.88123100  | -0.47934900 |
| N | 1.93874100  | 2.96074200  | -0.65501700 |
| C | -0.05425500 | 0.12938600  | 0.35922900  |
| C | -1.07306400 | 0.92825100  | 0.90920200  |
| C | -0.43637600 | -0.94087700 | -0.48509100 |
| C | -2.41358900 | 0.69818900  | 0.63866400  |
| H | -0.78863700 | 1.74819100  | 1.56282200  |
| C | -1.76315500 | -1.20002300 | -0.74656500 |
| H | 0.32975300  | -1.57999300 | -0.91476300 |
| C | -2.76216100 | -0.37631500 | -0.19234000 |
| H | -3.17199700 | 1.33641300  | 1.07578800  |
| H | -2.06866800 | -2.02393900 | -1.38332200 |
| C | 2.35910800  | -0.54047300 | 0.41223900  |
| O | 2.30680200  | -1.64693200 | 0.92686400  |
| O | 3.42149300  | -0.10768100 | -0.28833300 |

|   |             |             |             |
|---|-------------|-------------|-------------|
| C | 4.50742100  | -1.03479400 | -0.36655600 |
| H | 5.27173600  | -0.54101100 | -0.96567600 |
| H | 4.89423900  | -1.25971800 | 0.63000600  |
| H | 4.18917400  | -1.96142900 | -0.84957600 |
| O | -4.02364600 | -0.70065000 | -0.51543000 |
| C | -5.07893500 | 0.09812000  | 0.00593600  |
| H | -5.99960000 | -0.33644600 | -0.38240100 |
| H | -5.09055600 | 0.06646100  | 1.10023500  |
| H | -4.98960000 | 1.13486600  | -0.33456400 |

**I'** (R = Me , R' = OMe)

E(SMD/M06-2X/6-31G(d)) = -646.6829413 au

H(SMD/M06-2X/6-31G(d)) = -646.483853 au

G(SMD/M06-2X/6-31G(d)) = -646.542379 au

E(SMD/M06-2X/def2-TZVP//SMD/M06-2X /6-31G(d)) = -646.9396283 au

|   |             |             |             |
|---|-------------|-------------|-------------|
| C | 0.93846300  | 0.41980300  | 0.73059800  |
| N | 1.44194700  | 1.89186600  | -0.47169700 |
| N | 1.63280500  | 2.96230200  | -0.64744300 |
| C | -0.44610100 | 0.15601300  | 0.38232700  |
| C | -1.43598300 | 1.00826400  | 0.90526100  |
| C | -0.85428600 | -0.92270600 | -0.42924600 |
| C | -2.77794800 | 0.80084000  | 0.62186800  |
| H | -1.12551400 | 1.83789000  | 1.53450900  |
| C | -2.19716600 | -1.14228700 | -0.68658500 |
| H | -0.10657100 | -1.59679200 | -0.83757600 |
| C | -3.17830600 | -0.28187000 | -0.17065000 |
| H | -3.52983700 | 1.47378100  | 1.02492000  |
| H | -2.50075000 | -1.98257200 | -1.30560000 |
| C | 1.95490800  | -0.57114400 | 0.41223500  |
| O | 1.89027400  | -1.67072200 | 0.93992700  |
| O | 3.00191100  | -0.16664900 | -0.32317100 |
| C | 4.06724500  | -1.11662500 | -0.42535200 |
| H | 4.82270100  | -0.64264700 | -1.05086800 |
| H | 4.47813500  | -1.34044900 | 0.56166800  |
| H | 3.71586600  | -2.04012700 | -0.89078600 |
| C | -4.63403300 | -0.54026800 | -0.44314200 |
| H | -5.02590900 | -1.28125500 | 0.26368700  |
| H | -5.22745100 | 0.37093000  | -0.33325400 |
| H | -4.78218600 | -0.93908700 | -1.45064800 |

**I'** (R = F , R' = OMe)

E(SMD/M06-2X/6-31G(d)) = -706.5903819 au

H(SMD/M06-2X/6-31G(d)) = -706.428245 au

G(SMD/M06-2X/6-31G(d)) = -706.48346 au

E(SMD/M06-2X/def2-TZVP//SMD/M06-2X /6-31G(d)) = -706.8811168 au

|   |             |            |             |
|---|-------------|------------|-------------|
| C | -0.89536700 | 0.41812000 | -0.73461600 |
| N | -1.39150100 | 1.89971500 | 0.46656700  |
| N | -1.58294300 | 2.96944400 | 0.64449700  |
| C | 0.48426900  | 0.14174700 | -0.37610800 |

|   |             |             |             |
|---|-------------|-------------|-------------|
| C | 1.48326100  | 0.97921200  | -0.90982000 |
| C | 0.87271200  | -0.93383000 | 0.45038500  |
| C | 2.82395000  | 0.77013000  | -0.62573500 |
| H | 1.18223000  | 1.80075200  | -1.55292000 |
| C | 2.20905600  | -1.17495200 | 0.72255500  |
| H | 0.11553900  | -1.59521400 | 0.86047000  |
| C | 3.15521200  | -0.30955800 | 0.18306800  |
| H | 3.60752800  | 1.40645200  | -1.02182700 |
| H | 2.53281300  | -2.00183900 | 1.34516200  |
| C | -1.92258900 | -0.56217200 | -0.41560000 |
| O | -1.85887300 | -1.66699200 | -0.93196700 |
| O | -2.97298800 | -0.14218300 | 0.30407900  |
| F | 4.44626000  | -0.53096600 | 0.45434500  |
| C | -4.04682800 | -1.08324400 | 0.40640500  |
| H | -4.80484000 | -0.59613000 | 1.01845700  |
| H | -4.44883600 | -1.31520100 | -0.58231300 |
| H | -3.70683200 | -2.00355000 | 0.88630800  |

**1'** (R = H , R' = OMe)

E(SMD/M06-2X/6-31G(d)) = -607.3840118 au

H(SMD/M06-2X/6-31G(d)) = -607.214398 au

G(SMD/M06-2X/6-31G(d)) = -607.2677 au

E(SMD/M06-2X/def2-TZVP//SMD/M06-2X /6-31G(d)) = -607.6267506 au

|   |             |             |             |
|---|-------------|-------------|-------------|
| C | 0.45839500  | 0.37232200  | 0.73457600  |
| N | 0.89988000  | 1.93395900  | -0.40696000 |
| N | 1.03709100  | 3.01767700  | -0.54434700 |
| C | -0.88956900 | 0.02630100  | 0.30796300  |
| C | -1.95244700 | 0.81577900  | 0.78502000  |
| C | -1.18003500 | -1.07210900 | -0.52569200 |
| C | -3.26429900 | 0.53004400  | 0.43004300  |
| H | -1.72205300 | 1.65515200  | 1.43516100  |
| C | -2.49365800 | -1.37659600 | -0.85429300 |
| H | -0.36885900 | -1.69556700 | -0.89025100 |
| C | -3.53317000 | -0.57051400 | -0.38457700 |
| H | -4.07703200 | 1.14956100  | 0.79548700  |
| H | -2.71260100 | -2.23225000 | -1.48527100 |
| H | -4.55922200 | -0.80508000 | -0.65256600 |
| C | 1.55846500  | -0.52659500 | 0.42254500  |
| O | 1.55561600  | -1.64356900 | 0.91655300  |
| O | 2.59524600  | -0.02238300 | -0.26124700 |
| C | 3.73190600  | -0.88784900 | -0.35384700 |
| H | 4.47129600  | -0.33794200 | -0.93471800 |
| H | 4.12269500  | -1.11489100 | 0.64047400  |
| H | 3.46655000  | -1.81752300 | -0.86203800 |

**1'** (R = Cl , R' = OMe)

E(SMD/M06-2X/6-31G(d)) = -1066.954829 au

H(SMD/M06-2X/6-31G(d)) = -1066.793804 au

G(SMD/M06-2X/6-31G(d)) = -1066.850843 au

E(SMD/M06-2X/def2-TZVP//SMD/M06-2X /6-31G(d)) = -1067.231357 au



|    |             |             |             |
|----|-------------|-------------|-------------|
| C  | -1.32994400 | 0.42139900  | -0.75577700 |
| N  | -1.83680000 | 1.89071000  | 0.49019100  |
| N  | -2.07648900 | 2.94639900  | 0.68939400  |
| C  | 0.07080000  | 0.19413400  | -0.43328800 |
| C  | 1.01706400  | 1.10615600  | -0.93448900 |
| C  | 0.52562400  | -0.90474500 | 0.32164900  |
| C  | 2.37199800  | 0.94735700  | -0.68270300 |
| H  | 0.66794100  | 1.94754700  | -1.52576000 |
| C  | 1.87877100  | -1.09675700 | 0.55423100  |
| H  | -0.18870600 | -1.62584600 | 0.70704700  |
| C  | 2.78340900  | -0.15988600 | 0.05563800  |
| H  | 3.10045400  | 1.65553200  | -1.06186300 |
| H  | 2.23260200  | -1.94926100 | 1.12381000  |
| C  | -2.31050700 | -0.59493500 | -0.40541600 |
| O  | -2.22559300 | -1.68960800 | -0.93994400 |
| O  | -3.34186200 | -0.22162300 | 0.36245100  |
| Cl | 4.48477600  | -0.38510100 | 0.36187400  |
| C  | -4.37515100 | -1.20362200 | 0.50187500  |
| H  | -5.11951800 | -0.75268400 | 1.15669000  |
| H  | -4.81531900 | -1.43647500 | -0.47014800 |
| H  | -3.97839200 | -2.11662800 | 0.95089200  |

I' (R = CF<sub>3</sub>, R' = OMe)

E(SMD/M06-2X/6-31G(d)) = -944.3198923 au

H(SMD/M06-2X/6-31G(d)) = -944.141762 au

G(SMD/M06-2X/6-31G(d)) = -944.204824 au

E(SMD/M06-2X/def2-TZVP//SMD/M06-2X/6-31G(d)) = -944.7168893 au

|   |             |             |             |
|---|-------------|-------------|-------------|
| C | -1.98505800 | 0.40539000  | -0.78638700 |
| N | -2.50056000 | 1.89818000  | 0.47332100  |
| N | -2.79257700 | 2.93908700  | 0.67746900  |
| C | -0.56673100 | 0.22854800  | -0.49200100 |
| C | 0.32008100  | 1.23162500  | -0.91760600 |
| C | -0.04926500 | -0.91268900 | 0.15270300  |
| C | 1.68522900  | 1.12158400  | -0.68536500 |
| H | -0.08175600 | 2.10159900  | -1.42842400 |
| C | 1.31569200  | -1.04663200 | 0.34928400  |
| H | -0.72186300 | -1.70252600 | 0.47091900  |
| C | 2.17239600  | -0.02244100 | -0.06001700 |
| H | 2.36408100  | 1.90491700  | -1.00334500 |
| H | 1.71885100  | -1.93109700 | 0.83386800  |
| C | -2.93045200 | -0.62626700 | -0.39182800 |
| O | -2.83929200 | -1.71653800 | -0.93463700 |
| O | -3.93301100 | -0.27774500 | 0.42028800  |
| C | -4.93760000 | -1.28380500 | 0.60253500  |
| H | -5.66378900 | -0.84925800 | 1.28788300  |
| H | -5.41168600 | -1.52631300 | -0.35085800 |
| H | -4.50070100 | -2.18648500 | 1.03451700  |
| C | 3.64483900  | -0.19533000 | 0.18838000  |
| F | 3.90470400  | -0.35746300 | 1.49618000  |
| F | 4.12225200  | -1.28541900 | -0.43368000 |
| F | 4.36331600  | 0.85206800  | -0.23399900 |

**I'** (R = CN, R' = OMe)

E(SMD/M06-2X/6-31G(d)) = -699.5994266 au

H(SMD/M06-2X/6-31G(d)) = -699.429465 au

G(SMD/M06-2X/6-31G(d)) = -699.487571 au

E(SMD/M06-2X/def2-TZVP//SMD/M06-2X /6-31G(d)) = -699.8765275 au

|   |             |             |             |
|---|-------------|-------------|-------------|
| C | 1.19212900  | 0.34945600  | 0.78217200  |
| N | 1.69876400  | 1.93404700  | -0.39772300 |
| N | 1.98550000  | 2.98594600  | -0.54297200 |
| C | -0.20995900 | 0.14733600  | 0.43703000  |
| C | -1.12366100 | 1.16835100  | 0.76015100  |
| C | -0.69013900 | -1.04378200 | -0.13976800 |
| C | -2.47369100 | 1.02669500  | 0.48687300  |
| H | -0.75237100 | 2.07790600  | 1.22285400  |
| C | -2.04609500 | -1.21587600 | -0.37198500 |
| H | 0.00139400  | -1.84496900 | -0.37741000 |
| C | -2.93164000 | -0.17418300 | -0.07074200 |
| H | -3.17596500 | 1.81927200  | 0.72068200  |
| H | -2.42140000 | -2.13779600 | -0.80285600 |
| C | 2.18915800  | -0.62479800 | 0.37359100  |
| O | 2.13370000  | -1.73111700 | 0.88824400  |
| O | 3.18260900  | -0.21330900 | -0.41641600 |
| C | 4.23185300  | -1.17113800 | -0.61398300 |
| H | 4.94992000  | -0.68354100 | -1.27145700 |
| H | 4.69941300  | -1.42557700 | 0.33937400  |
| H | 3.83912500  | -2.07512400 | -1.08372200 |
| C | -4.33692900 | -0.34207900 | -0.33205800 |
| N | -5.46665500 | -0.47637300 | -0.54355900 |

**I'** (R = NO<sub>2</sub>, R' = OMe)

E(SMD/M06-2X/6-31G(d)) = -811.8094114 au

H(SMD/M06-2X/6-31G(d)) = -811.63455 au

G(SMD/M06-2X/6-31G(d)) = -811.694962 au

E(SMD/M06-2X/def2-TZVP//SMD/M06-2X /6-31G(d)) = -812.140919 au

|   |             |             |             |
|---|-------------|-------------|-------------|
| C | 1.59444400  | 0.35306000  | 0.79653700  |
| N | 2.11452800  | 1.94106800  | -0.40783500 |
| N | 2.43868600  | 2.97757700  | -0.57957600 |
| C | 0.18583500  | 0.17595800  | 0.46763700  |
| C | -0.69445600 | 1.25095000  | 0.69879100  |
| C | -0.33316600 | -1.04969600 | 0.00854000  |
| C | -2.04933200 | 1.12794900  | 0.44051600  |
| H | -0.29706600 | 2.18784600  | 1.07720000  |
| C | -1.69583500 | -1.20147000 | -0.20380000 |
| H | 0.33191500  | -1.89037500 | -0.15447200 |
| C | -2.52258700 | -0.10440300 | 0.00219100  |
| H | -2.73378200 | 1.95212100  | 0.59873000  |
| H | -2.11050400 | -2.14146500 | -0.54687500 |
| C | 2.57545200  | -0.63069800 | 0.37546400  |
| O | 2.51296400  | -1.73076700 | 0.90260600  |
| O | 3.55571700  | -0.23836700 | -0.43695100 |
| C | 4.58985500  | -1.21111100 | -0.64785500 |
| H | 5.29939400  | -0.73748700 | -1.32431400 |

|   |             |             |             |
|---|-------------|-------------|-------------|
| H | 5.07351200  | -1.46199200 | 0.29830300  |
| H | 4.17590100  | -2.11383100 | -1.10123500 |
| N | -3.96263400 | -0.25317600 | -0.24871400 |
| O | -4.37001100 | -1.34713600 | -0.59741800 |
| O | -4.67050600 | 0.72672800  | -0.09606100 |

**1a** (R = NMe<sub>2</sub>, R' = OMe)

E(SMD/M06-2X/6-31G(d)) = -631.8392398 au

H(SMD/M06-2X/6-31G(d)) = -631.599998 au

G(SMD/M06-2X/6-31G(d)) = -631.656697 au

E(SMD/M06-2X/def2-TZVP//SMD/M06-2X /6-31G(d)) = -632.092357 au

|   |             |             |             |
|---|-------------|-------------|-------------|
| C | -1.94647600 | -1.24942700 | 0.08441200  |
| C | -0.63498000 | -0.79457100 | 0.06103500  |
| C | 0.43078400  | -1.73992500 | -0.11074700 |
| C | -0.23824800 | 0.58193700  | 0.18793200  |
| C | 1.74483800  | -1.37431800 | -0.15221000 |
| H | 0.15550500  | -2.78625600 | -0.21040000 |
| C | 1.06642000  | 0.97569500  | 0.15187800  |
| H | -1.01242100 | 1.33412600  | 0.32353100  |
| C | 2.11183800  | 0.00531300  | -0.01678800 |
| H | 2.51081500  | -2.12769700 | -0.28534200 |
| H | 1.31559100  | 2.02465000  | 0.25177500  |
| C | -3.00185700 | -0.28143900 | 0.30539100  |
| O | -3.44797500 | 0.02183100  | 1.40141700  |
| O | -3.54162500 | 0.17026000  | -0.85149500 |
| C | -4.69119300 | 1.00277600  | -0.69742700 |
| H | -5.01036800 | 1.25867300  | -1.70780100 |
| H | -5.48968400 | 0.47010400  | -0.17483300 |
| H | -4.44439200 | 1.91103100  | -0.14151600 |
| N | 3.39519100  | 0.38174400  | -0.04451200 |
| C | 3.76000300  | 1.78864100  | 0.09863100  |
| H | 3.32086400  | 2.38763100  | -0.70491300 |
| H | 3.42142400  | 2.18181100  | 1.06217500  |
| H | 4.84331100  | 1.87762300  | 0.04666300  |
| C | 4.45529100  | -0.60889500 | -0.21035600 |
| H | 4.34843700  | -1.13646700 | -1.16324900 |
| H | 5.41712500  | -0.09997700 | -0.19926400 |
| H | 4.43574700  | -1.33889600 | 0.60486900  |

**1a** (R = NH<sub>2</sub>, R' = OMe)

E(SMD/M06-2X/6-31G(d)) = -553.2652612 au

H(SMD/M06-2X/6-31G(d)) = -553.087067 au

G(SMD/M06-2X/6-31G(d)) = -553.137523 au

E(SMD/M06-2X/def2-TZVP//SMD/M06-2X /6-31G(d)) = -553.4947037 au

|   |             |             |             |
|---|-------------|-------------|-------------|
| C | 1.06515000  | 1.22689900  | 0.01894400  |
| C | -0.20617300 | 0.66785100  | 0.02132900  |
| C | -1.33968600 | 1.51817800  | -0.21271500 |
| C | -0.48746900 | -0.72833900 | 0.23033000  |
| C | -2.61862200 | 1.04330600  | -0.24445400 |
| H | -1.14329600 | 2.57503700  | -0.36924000 |
| C | -1.75630900 | -1.22534400 | 0.20457700  |
| H | 0.34481200  | -1.40236500 | 0.42018100  |

|   |             |             |             |
|---|-------------|-------------|-------------|
| C | -2.85766000 | -0.34758200 | -0.03716400 |
| H | -3.46525300 | 1.69918700  | -0.42365900 |
| H | -1.95721000 | -2.28064600 | 0.36404700  |
| C | 2.19395500  | 0.36115500  | 0.29530100  |
| O | 2.66256600  | 0.16559100  | 1.40606700  |
| O | 2.76534600  | -0.12084100 | -0.83343400 |
| C | 3.97715600  | -0.84925500 | -0.63360900 |
| H | 4.31260800  | -1.14635000 | -1.62726800 |
| H | 4.73279200  | -0.22218900 | -0.15383100 |
| H | 3.80334100  | -1.73471100 | -0.01679900 |
| N | -4.09950600 | -0.82968900 | -0.06765000 |
| H | -4.89367600 | -0.22495400 | -0.23628700 |
| H | -4.28291500 | -1.81439800 | 0.08011700  |

**1a** (R = OMe, R' = OMe)

E(SMD/M06-2X/6-31G(d)) = -612.3979685 au

H(SMD/M06-2X/6-31G(d)) = -612.202142 au

G(SMD/M06-2X/6-31G(d)) = -612.255301 au

E(SMD/M06-2X/def2-TZVP//SMD/M06-2X /6-31G(d)) = -612.6470602 au

|   |             |             |             |
|---|-------------|-------------|-------------|
| C | -1.51471100 | 1.23378900  | -0.00582000 |
| C | -0.23490200 | 0.65916900  | -0.04172700 |
| C | 0.88719900  | 1.50675800  | 0.18099900  |
| C | 0.02878300  | -0.73048700 | -0.26749600 |
| C | 2.17956300  | 1.03043100  | 0.19145700  |
| H | 0.69301300  | 2.56176600  | 0.34951100  |
| C | 1.30548200  | -1.22262700 | -0.26462300 |
| H | -0.80569900 | -1.40293400 | -0.45045300 |
| C | 2.39280000  | -0.34524000 | -0.03122100 |
| H | 3.01220000  | 1.70040900  | 0.36703600  |
| H | 1.52172200  | -2.27213600 | -0.43390100 |
| C | -2.64747100 | 0.36561100  | -0.26948500 |
| O | -3.11348400 | 0.18839100  | -1.38273600 |
| O | -3.20122300 | -0.12700900 | 0.85566600  |
| C | -4.41360900 | -0.86179100 | 0.66390700  |
| H | -4.73420700 | -1.16750500 | 1.65938300  |
| H | -5.17600800 | -0.23279600 | 0.19837100  |
| H | -4.23931100 | -1.74050900 | 0.03834300  |
| O | 3.59140100  | -0.91592800 | -0.04090600 |
| C | 4.74662200  | -0.10801600 | 0.19038400  |
| H | 5.59429200  | -0.78948800 | 0.13728800  |
| H | 4.83975800  | 0.66130500  | -0.58127400 |
| H | 4.70214100  | 0.35267900  | 1.18124800  |

**1a** (R = Me, R' = OMe)

E(SMD/M06-2X/6-31G(d)) = -537.2100051 au

H(SMD/M06-2X/6-31G(d)) = -537.020774 au

G(SMD/M06-2X/6-31G(d)) = -537.072849 au

E(SMD/M06-2X/def2-TZVP//SMD/M06-2X /6-31G(d)) = -537.4243245 au

|   |             |             |             |
|---|-------------|-------------|-------------|
| C | 1.10125700  | 1.24122200  | -0.00920700 |
| C | -0.19537600 | 0.67440800  | 0.01143100  |
| C | -1.29919400 | 1.53392500  | -0.22690900 |
| C | -0.46432200 | -0.70617200 | 0.23684100  |

|   |             |             |             |
|---|-------------|-------------|-------------|
| C | -2.59301400 | 1.04734900  | -0.24606900 |
| H | -1.09487800 | 2.58712900  | -0.39460800 |
| C | -1.75595500 | -1.18549600 | 0.22082700  |
| H | 0.36409700  | -1.38278600 | 0.43234300  |
| C | -2.83742500 | -0.31640600 | -0.02474600 |
| H | -3.42997300 | 1.71449600  | -0.42948700 |
| H | -1.95455900 | -2.23902700 | 0.39699000  |
| C | 2.21684300  | 0.35693200  | 0.27552100  |
| O | 2.64537000  | 0.18392500  | 1.40377000  |
| O | 2.78895100  | -0.14694000 | -0.83084000 |
| C | 3.98719400  | -0.89861600 | -0.60713200 |
| H | 4.32679500  | -1.21156600 | -1.59376700 |
| H | 4.74561500  | -0.27751500 | -0.12524500 |
| H | 3.78379400  | -1.77224200 | 0.01645600  |
| C | -4.23413800 | -0.86034300 | -0.06718300 |
| H | -4.97742600 | -0.06309800 | 0.00031500  |
| H | -4.39380200 | -1.39650000 | -1.01051300 |
| H | -4.39944800 | -1.57559800 | 0.74383400  |

**1a** (R = F, R' = OMe)

E(SMD/M06-2X/6-31G(d)) = -597.116936 au

H(SMD/M06-2X/6-31G(d)) = -596.964697 au

G(SMD/M06-2X/6-31G(d)) = -597.014828 au

E(SMD/M06-2X/def2-TZVP//SMD/M06-2X /6-31G(d)) = -597.3648833 au

|   |             |             |             |
|---|-------------|-------------|-------------|
| C | -1.04355200 | 1.23683900  | 0.01249800  |
| C | 0.24485300  | 0.65076300  | 0.01928800  |
| C | 0.48993000  | -0.73792500 | 0.22343500  |
| C | 1.35785500  | 1.50380000  | -0.21145200 |
| C | 1.77070900  | -1.24621000 | 0.19722400  |
| H | -0.34763900 | -1.40426200 | 0.41155800  |
| C | 2.64722000  | 1.01064800  | -0.24702700 |
| H | 1.16477300  | 2.56092900  | -0.36310800 |
| C | 2.81981800  | -0.35594900 | -0.04071100 |
| H | 1.98785600  | -2.29738200 | 0.35058500  |
| H | 3.51221200  | 1.63942700  | -0.42485800 |
| C | -2.17250600 | 0.36486800  | 0.28366200  |
| O | -2.58999200 | 0.16941500  | 1.41208100  |
| O | -2.76412400 | -0.09690200 | -0.82925900 |
| C | -3.97468100 | -0.83253700 | -0.61477900 |
| H | -4.32890200 | -1.11098500 | -1.60650800 |
| H | -3.78151700 | -1.72678300 | -0.01789300 |
| H | -4.71627100 | -0.21069300 | -0.10848700 |
| F | 4.05606000  | -0.84401500 | -0.07074400 |

**1a** (R = H, R' = OMe)

E(SMD/M06-2X/6-31G(d)) = -497.9094392 au

H(SMD/M06-2X/6-31G(d)) = -497.74978 au

G(SMD/M06-2X/6-31G(d)) = -497.79772 au

E(SMD/M06-2X/def2-TZVP//SMD/M06-2X /6-31G(d)) = -498.1093296 au

|   |             |             |             |
|---|-------------|-------------|-------------|
| C | -0.53374700 | -1.19773300 | 0.03202800  |
| C | 0.70767900  | -0.50613200 | 0.01638200  |
| C | 1.88000200  | -1.27179900 | -0.20823200 |

|   |             |             |             |
|---|-------------|-------------|-------------|
| C | 0.83870000  | 0.89852700  | 0.19376900  |
| C | 3.12507400  | -0.66689300 | -0.26055900 |
| H | 1.76826000  | -2.34361300 | -0.34047300 |
| C | 2.08252200  | 1.50006400  | 0.14887100  |
| H | -0.05085800 | 1.49684900  | 0.37425400  |
| C | 3.21976300  | 0.71522800  | -0.08029600 |
| H | 4.01933600  | -1.25517300 | -0.43643100 |
| H | 2.18278000  | 2.57143300  | 0.28737000  |
| H | 4.19502200  | 1.19223400  | -0.11744800 |
| C | -1.72727100 | -0.41359000 | 0.29368900  |
| O | -2.14978000 | -0.23278100 | 1.42271200  |
| O | -2.36192300 | -0.02299500 | -0.82179600 |
| C | -3.62607600 | 0.61774900  | -0.61077000 |
| H | -4.00799500 | 0.84807400  | -1.60454700 |
| H | -4.31203100 | -0.05184500 | -0.08721900 |
| H | -3.50077100 | 1.53572500  | -0.03212500 |

**1a** (R = Cl, R' = OMe)

E(SMD/M06-2X/6-31G(d)) = -957.4797063 au

H(SMD/M06-2X/6-31G(d)) = -957.328565 au

G(SMD/M06-2X/6-31G(d)) = -957.379658 au

E(SMD/M06-2X/def2-TZVP//SMD/M06-2X /6-31G(d)) = -957.7137662 au

|    |             |             |             |
|----|-------------|-------------|-------------|
| C  | -1.54210800 | 1.25389000  | -0.01121100 |
| C  | -0.21649200 | 0.74167900  | 0.01117800  |
| C  | 0.10754300  | -0.62414400 | 0.23296100  |
| C  | 0.84268700  | 1.65365100  | -0.22324200 |
| C  | 1.41859000  | -1.05653200 | 0.22040500  |
| H  | -0.68836200 | -1.33967700 | 0.42214300  |
| C  | 2.16127600  | 1.23579300  | -0.24447700 |
| H  | 0.59233500  | 2.69651600  | -0.38983100 |
| C  | 2.42692700  | -0.11628900 | -0.02074100 |
| H  | 1.67287300  | -2.09692300 | 0.38977100  |
| H  | 2.97323400  | 1.93076000  | -0.42617100 |
| C  | -2.61485100 | 0.31643700  | 0.27065100  |
| O  | -3.01846600 | 0.12320400  | 1.40421200  |
| O  | -3.16992500 | -0.20783800 | -0.83088800 |
| C  | -4.32928000 | -1.01940900 | -0.60216900 |
| H  | -4.66046400 | -1.34234200 | -1.58819600 |
| H  | -4.07698500 | -1.88516300 | 0.01419300  |
| H  | -5.11214900 | -0.43786600 | -0.11057900 |
| Cl | 4.07534600  | -0.65639300 | -0.04106200 |

**1a** (R = CF<sub>3</sub>, R' = OMe)

E(SMD/M06-2X/6-31G(d)) = -834.8426793 au

H(SMD/M06-2X/6-31G(d)) = -834.674392 au

G(SMD/M06-2X/6-31G(d)) = -834.732004 au

E(SMD/M06-2X/def2-TZVP//SMD/M06-2X /6-31G(d)) = -835.1964212 au

|   |             |             |             |
|---|-------------|-------------|-------------|
| C | 2.24955800  | 1.26878700  | 0.01123900  |
| C | 0.89272700  | 0.81960600  | 0.03123600  |
| C | -0.10947600 | 1.78562500  | -0.21144000 |
| C | 0.50422500  | -0.52755600 | 0.25456700  |
| C | -1.45085200 | 1.42997800  | -0.24520800 |

|   |             |             |             |
|---|-------------|-------------|-------------|
| H | 0.19810700  | 2.81312100  | -0.37612100 |
| C | -0.82980800 | -0.88499200 | 0.23343900  |
| H | 1.26270700  | -1.27986400 | 0.45248100  |
| C | -1.79263200 | 0.09933200  | -0.02098600 |
| H | -2.21949300 | 2.16974800  | -0.43663600 |
| H | -1.13549300 | -1.91257900 | 0.40539100  |
| C | 3.27418800  | 0.27249900  | 0.26863700  |
| O | 3.65302400  | 0.03657500  | 1.40255000  |
| O | 3.81348300  | -0.24835100 | -0.83916800 |
| C | 4.93202800  | -1.11991500 | -0.62247400 |
| H | 5.25443800  | -1.43417700 | -1.61404000 |
| H | 5.73716000  | -0.58704400 | -0.11228600 |
| H | 4.63370200  | -1.98682100 | -0.02897600 |
| C | -3.23828300 | -0.32878600 | -0.03101100 |
| F | -3.43999000 | -1.32664600 | -0.90364300 |
| F | -3.61157300 | -0.78339400 | 1.17394300  |
| F | -4.06546400 | 0.66830200  | -0.35973000 |

**1a** (R = CN, R' = OMe)

E(SMD/M06-2X/6-31G(d)) = -590.1212224 au

H(SMD/M06-2X/6-31G(d)) = -589.961193 au

G(SMD/M06-2X/6-31G(d)) = -590.013716 au

E(SMD/M06-2X/def2-TZVP//SMD/M06-2X /6-31G(d)) = -590.3552038 au

|   |             |             |             |
|---|-------------|-------------|-------------|
| C | 1.40916300  | 1.24493400  | 0.00000400  |
| C | 0.07511400  | 0.72517500  | 0.01803600  |
| C | -0.97665100 | 1.64083200  | -0.21483600 |
| C | -0.23925900 | -0.64064300 | 0.23310100  |
| C | -2.29586800 | 1.21899600  | -0.24305400 |
| H | -0.72392200 | 2.68383900  | -0.37438500 |
| C | -1.55177700 | -1.07383200 | 0.21633900  |
| H | 0.55909700  | -1.35308100 | 0.42162700  |
| C | -2.56918900 | -0.13692400 | -0.02482300 |
| H | -3.10748800 | 1.91440300  | -0.42475600 |
| H | -1.80332800 | -2.11557600 | 0.38126500  |
| C | 2.47964300  | 0.30013500  | 0.26490000  |
| O | 2.85663900  | 0.08957000  | 1.40433900  |
| O | 3.05174800  | -0.20024000 | -0.83435700 |
| C | 4.20723400  | -1.01926900 | -0.60324300 |
| H | 4.55108200  | -1.32484700 | -1.59023200 |
| H | 4.98317100  | -0.44696300 | -0.09062100 |
| H | 3.94304100  | -1.89470000 | -0.00617300 |
| C | -3.93904400 | -0.58567300 | -0.04790800 |
| N | -5.03784700 | -0.94572800 | -0.06681000 |

**1a** (R = NO<sub>2</sub>, R' = OMe)

E(SMD/M06-2X/6-31G(d)) = -702.3300564 au

H(SMD/M06-2X/6-31G(d)) = -702.165084 au

G(SMD/M06-2X/6-31G(d)) = -702.220659 au

E(SMD/M06-2X/def2-TZVP//SMD/M06-2X /6-31G(d)) = -702.6183971 au

|   |             |            |             |
|---|-------------|------------|-------------|
| C | 1.84147100  | 1.26342300 | 0.08316200  |
| C | 0.49369600  | 0.77082900 | 0.07561100  |
| C | -0.53467800 | 1.72001900 | -0.11834500 |

|   |             |             |             |
|---|-------------|-------------|-------------|
| C | 0.14978700  | -0.59532500 | 0.22797000  |
| C | -1.86496400 | 1.33038200  | -0.17358600 |
| H | -0.25923700 | 2.76351900  | -0.22786800 |
| C | -1.17328800 | -0.99933700 | 0.18978800  |
| H | 0.93008000  | -1.33387000 | 0.38791100  |
| C | -2.14233900 | -0.02078300 | -0.01422700 |
| H | -2.66673300 | 2.04159000  | -0.32711700 |
| H | -1.45959200 | -2.03702200 | 0.30691800  |
| C | 2.89309200  | 0.28105000  | 0.27520100  |
| O | 3.26271000  | -0.01344300 | 1.39837900  |
| O | 3.45573600  | -0.15182700 | -0.85541900 |
| C | 4.59569000  | -1.00723400 | -0.68313100 |
| H | 4.93540200  | -1.24677400 | -1.68951900 |
| H | 5.38081100  | -0.48750800 | -0.13018800 |
| H | 4.31341800  | -1.91818700 | -0.15106000 |
| N | -3.55865200 | -0.44841900 | -0.06111600 |
| O | -3.79574300 | -1.63052200 | 0.09816400  |
| O | -4.39950000 | 0.40817300  | -0.25561400 |

**I'•B(C<sub>6</sub>F<sub>5</sub>)<sub>3</sub> (R = NMe<sub>2</sub>, R' = OMe)**

E(SMD/M06-2X/6-31G(d)) = -2948.864545 au

H(SMD/M06-2X/6-31G(d)) = -2948.426868 au

G(SMD/M06-2X/6-31G(d)) = -2948.556604 au

E(SMD/M06-2X/def2-TZVP//SMD/M06-2X /6-31G(d)) = -2950.119982 au

|   |             |             |             |
|---|-------------|-------------|-------------|
| C | 2.25019000  | -0.11552800 | -0.80212200 |
| N | 1.65248400  | -1.86038100 | -0.83377900 |
| N | 1.59188800  | -2.94865100 | -0.68604000 |
| C | 3.64346900  | -0.07473300 | -0.88201200 |
| C | 4.44434700  | -0.19548600 | 0.28698900  |
| C | 4.31098000  | 0.09539100  | -2.12661900 |
| C | 5.80991100  | -0.12327700 | 0.23173500  |
| H | 3.94864100  | -0.33872300 | 1.24358100  |
| C | 5.67599200  | 0.17658800  | -2.20073500 |
| H | 3.71471600  | 0.17562800  | -3.03109000 |
| C | 6.47600200  | 0.07079300  | -1.01964200 |
| H | 6.38441500  | -0.20960500 | 1.14491600  |
| H | 6.14729400  | 0.32314900  | -3.16414200 |
| C | 1.06143500  | 0.52761600  | -0.93439600 |
| O | -0.06441300 | -0.08718300 | -1.14563100 |
| O | 0.96572400  | 1.85038200  | -0.81147500 |
| C | 2.06533300  | 2.59961400  | -0.28802100 |
| H | 2.41297600  | 2.15735000  | 0.65068700  |
| H | 2.88418100  | 2.64209100  | -1.01030000 |
| H | 1.67226000  | 3.59921600  | -0.10869900 |
| B | -1.20284800 | -0.00869400 | -0.13510500 |
| C | -2.04353000 | 1.38742400  | -0.32480300 |
| C | -2.24519200 | 1.90366900  | -1.60260600 |
| C | -2.67993900 | 2.09501700  | 0.69047600  |
| C | -2.98165800 | 3.05154700  | -1.86385200 |
| C | -3.42783800 | 3.24488100  | 0.47323500  |
| C | -3.57790700 | 3.73091700  | -0.81483000 |



|   |             |             |             |
|---|-------------|-------------|-------------|
| C | -0.47710600 | -0.20206000 | 1.33148900  |
| C | -0.15657900 | -1.46607800 | 1.82319700  |
| C | 0.07260300  | 0.84837800  | 2.06708100  |
| C | 0.60595300  | -1.68725100 | 2.96414500  |
| C | 0.84064600  | 0.67411700  | 3.21062500  |
| C | 1.10562800  | -0.60610400 | 3.66931900  |
| C | -2.21708900 | -1.24231600 | -0.51000500 |
| C | -3.40490800 | -1.38036700 | 0.20185400  |
| C | -2.02501800 | -2.20246300 | -1.50003400 |
| C | -4.35197100 | -2.36382700 | -0.04028900 |
| C | -2.95002400 | -3.20315400 | -1.77895900 |
| C | -4.12237700 | -3.28628100 | -1.04799500 |
| F | -2.59672200 | 1.69636400  | 1.96931600  |
| F | -4.00518500 | 3.88503600  | 1.49498800  |
| F | -4.29219900 | 4.83398800  | -1.04222400 |
| F | -3.12815700 | 3.49853900  | -3.11530100 |
| F | -1.73149500 | 1.28446700  | -2.67746600 |
| F | -3.67808400 | -0.52736600 | 1.20416600  |
| F | -5.47126600 | -2.43154600 | 0.68545000  |
| F | -5.01408400 | -4.24325500 | -1.30567100 |
| F | -2.70920300 | -4.09451600 | -2.74541500 |
| F | -0.91147800 | -2.24168600 | -2.24913100 |
| F | -0.08686200 | 2.12447400  | 1.68203500  |
| F | 1.33767700  | 1.72879600  | 3.86158600  |
| F | 1.84229800  | -0.79312700 | 4.76282300  |
| F | 0.86965500  | -2.92955700 | 3.37520900  |
| F | -0.54685000 | -2.57956000 | 1.17767300  |
| N | 7.81519100  | 0.15343500  | -1.08266700 |
| C | 8.61878600  | 0.06028700  | 0.13098900  |
| H | 9.66935400  | 0.16177500  | -0.13435300 |
| H | 8.35840100  | 0.85779800  | 0.83456300  |
| H | 8.47485800  | -0.90698300 | 0.62356900  |
| C | 8.48374000  | 0.34600300  | -2.36453300 |
| H | 8.17956000  | 1.29063500  | -2.82768500 |
| H | 9.55946400  | 0.37004600  | -2.19970300 |
| H | 8.25499700  | -0.47468500 | -3.05198200 |

**1'• B(C<sub>6</sub>F<sub>5</sub>)<sub>3</sub> (R = NH<sub>2</sub>, R' = OMe)**

E(SMD/M06-2X/6-31G(d)) = -2870.292508 au

H(SMD/M06-2X/6-31G(d)) = -2869.915697 au

G(SMD/M06-2X/6-31G(d)) = -2870.036444 au

E(SMD/M06-2X/def2-TZVP//SMD/M06-2X /6-31G(d)) = -2871.524147 au

|   |             |             |             |
|---|-------------|-------------|-------------|
| C | -2.51549900 | -0.22363900 | -1.30689500 |
| N | -2.10560000 | 1.57393700  | -1.32002000 |
| N | -2.29571500 | 2.65647700  | -1.25425000 |
| C | -3.90426000 | -0.35635600 | -1.31722700 |
| C | -4.64734300 | -0.30935700 | -0.10198900 |
| C | -4.61938900 | -0.51781500 | -2.53786300 |
| C | -6.00867200 | -0.44276500 | -0.09850700 |
| H | -4.10823200 | -0.17578400 | 0.83244600  |
| C | -5.98092500 | -0.65700400 | -2.54804000 |

|   |             |             |             |
|---|-------------|-------------|-------------|
| H | -4.06110500 | -0.54043000 | -3.46913700 |
| C | -6.71000400 | -0.62048000 | -1.32579100 |
| H | -6.57207300 | -0.41959100 | 0.82911600  |
| H | -6.52249500 | -0.79547200 | -3.47862100 |
| C | -1.27989500 | -0.77441200 | -1.22222800 |
| O | -0.16960300 | -0.10256100 | -1.33949900 |
| O | -1.12037500 | -2.08905200 | -1.06190000 |
| C | -2.22313900 | -2.90894400 | -0.67043000 |
| H | -2.69851200 | -2.50367800 | 0.22628000  |
| H | -2.95173200 | -2.99619400 | -1.48064200 |
| H | -1.78856800 | -3.88485900 | -0.45585600 |
| B | 0.80252800  | 0.09429200  | -0.17763900 |
| C | 1.27720400  | -1.33168100 | 0.47813500  |
| C | 1.70701500  | -2.34729100 | -0.37313300 |
| C | 1.41423000  | -1.60808900 | 1.83171200  |
| C | 2.19107400  | -3.56843000 | 0.06834900  |
| C | 1.90018800  | -2.81692100 | 2.31922600  |
| C | 2.28887700  | -3.80501000 | 1.43201200  |
| C | -0.01725000 | 1.07778000  | 0.85610900  |
| C | 0.13603500  | 2.45608200  | 0.95425600  |
| C | -1.10959500 | 0.57241700  | 1.55787300  |
| C | -0.72440300 | 3.27625400  | 1.67721000  |
| C | -1.99817900 | 1.34948100  | 2.28366100  |
| C | -1.80776200 | 2.72172600  | 2.33822300  |
| C | 2.16513900  | 0.74576500  | -0.79318500 |
| C | 3.13946200  | 1.18601300  | 0.09850900  |
| C | 2.53297000  | 0.79254700  | -2.13169500 |
| C | 4.37934200  | 1.66865000  | -0.28125300 |
| C | 3.77094100  | 1.26841600  | -2.55803600 |
| C | 4.69828000  | 1.70933700  | -1.63163600 |
| F | 1.07332300  | -0.70323400 | 2.76361900  |
| F | 1.99872100  | -3.02931500 | 3.63530600  |
| F | 2.75718000  | -4.97014800 | 1.88101100  |
| F | 2.57563900  | -4.51066900 | -0.79842400 |
| F | 1.66640500  | -2.16286000 | -1.70116000 |
| F | 2.87366600  | 1.15893100  | 1.41695900  |
| F | 5.26542700  | 2.08819800  | 0.62639700  |
| F | 5.88641000  | 2.16653900  | -2.02891600 |
| F | 4.07103700  | 1.29602000  | -3.86048800 |
| F | 1.71251400  | 0.37711100  | -3.10608900 |
| F | -1.36210200 | -0.75103400 | 1.54033700  |
| F | -3.04143100 | 0.79342000  | 2.90890800  |
| F | -2.64815800 | 3.49270400  | 3.02532300  |
| F | -0.52331700 | 4.59475800  | 1.72558500  |
| F | 1.12802600  | 3.09488900  | 0.31493400  |
| N | -8.04059100 | -0.75268800 | -1.32848400 |
| H | -8.55295400 | -0.87713900 | -2.19204000 |
| H | -8.57049500 | -0.72491300 | -0.46681100 |

**1'•B(C<sub>6</sub>F<sub>5</sub>)<sub>3</sub> (R = OMe, R' = OMe)**

E(SMD/M06-2X/6-31G(d)) = -2929.425809 au

H(SMD/M06-2X/6-31G(d)) = -2929.031266 au  
 G(SMD/M06-2X/6-31G(d)) = -2929.15568 au  
 E(SMD/M06-2X/def2-TZVP//SMD/M06-2X /6-31G(d)) = -2930.678309 au

|   |             |             |             |
|---|-------------|-------------|-------------|
| C | 2.38143600  | 0.24598900  | -1.15989500 |
| N | 1.92531300  | -1.63667500 | -1.23701300 |
| N | 2.03242600  | -2.73065600 | -1.21382500 |
| C | 3.77291000  | 0.30180400  | -1.06186800 |
| C | 4.41651800  | 0.21878100  | 0.20629600  |
| C | 4.57042300  | 0.43885400  | -2.22559300 |
| C | 5.78130100  | 0.29519800  | 0.29793200  |
| H | 3.80842200  | 0.10534000  | 1.09922900  |
| C | 5.94375500  | 0.52062100  | -2.14324200 |
| H | 4.07873300  | 0.48890500  | -3.19219000 |
| C | 6.55692500  | 0.44738400  | -0.87557500 |
| H | 6.29506600  | 0.24488300  | 1.25171300  |
| H | 6.53527300  | 0.63793300  | -3.04288100 |
| C | 1.14237100  | 0.78713400  | -1.11374700 |
| O | 0.03876700  | 0.12194500  | -1.29218500 |
| O | 0.98652900  | 2.10178400  | -0.94571400 |
| C | 2.08719400  | 2.91082200  | -0.52430100 |
| H | 2.52329500  | 2.51090800  | 0.39464900  |
| H | 2.84481600  | 2.97606400  | -1.31002400 |
| H | 1.66109200  | 3.89596200  | -0.33848500 |
| B | -0.99068900 | -0.08591300 | -0.17879900 |
| C | -1.48274900 | 1.33491100  | 0.47421800  |
| C | -1.86773600 | 2.36389800  | -0.38242100 |
| C | -1.67678200 | 1.59583200  | 1.82389800  |
| C | -2.36291700 | 3.58284600  | 0.05232500  |
| C | -2.17555300 | 2.80220800  | 2.30452500  |
| C | -2.51866400 | 3.80360300  | 1.41334900  |
| C | -0.23029800 | -1.09209100 | 0.87670200  |
| C | -0.40687600 | -2.46876900 | 0.95546700  |
| C | 0.83367600  | -0.60806500 | 1.63440500  |
| C | 0.40551500  | -3.30656800 | 1.71318900  |
| C | 1.67412400  | -1.40295700 | 2.39726200  |
| C | 1.46254700  | -2.77275400 | 2.43125600  |
| C | -2.32747800 | -0.71417600 | -0.86917200 |
| C | -3.34490800 | -1.16073500 | -0.03023500 |
| C | -2.63469000 | -0.73245800 | -2.22350900 |
| C | -4.57043800 | -1.62474700 | -0.47423000 |
| C | -3.85598400 | -1.18950900 | -2.71380800 |
| C | -4.82794900 | -1.63814000 | -1.83821200 |
| F | -1.38280100 | 0.67730200  | 2.75812300  |
| F | -2.33025000 | 2.99920700  | 3.61741500  |
| F | -2.99820500 | 4.96654600  | 1.85569600  |
| F | -2.70229100 | 4.53820600  | -0.81877800 |
| F | -1.76785800 | 2.19518300  | -1.70942800 |
| F | -3.13835800 | -1.15909200 | 1.29895300  |
| F | -5.50058400 | -2.05163900 | 0.38442200  |
| F | -6.00040500 | -2.07762300 | -2.29690400 |

|   |             |             |             |
|---|-------------|-------------|-------------|
| F | -4.09762400 | -1.19094900 | -4.02855900 |
| F | -1.76757400 | -0.30526200 | -3.15141600 |
| F | 1.10439200  | 0.71220600  | 1.64009400  |
| F | 2.69306000  | -0.86554700 | 3.07658100  |
| F | 2.25819800  | -3.56065400 | 3.15134100  |
| F | 0.18457900  | -4.62236900 | 1.73941900  |
| F | -1.37369300 | -3.08897800 | 0.26205100  |
| O | 7.86868200  | 0.51425200  | -0.68322600 |
| C | 8.72912700  | 0.66581000  | -1.81367700 |
| H | 8.51042800  | 1.59834800  | -2.34152800 |
| H | 9.73942800  | 0.69757000  | -1.40900200 |
| H | 8.62681200  | -0.18609000 | -2.49176400 |

**I'•B(C<sub>6</sub>F<sub>5</sub>)<sub>3</sub> (R = Me, R' = OMe)**

E(SMD/M06-2X/6-31G(d)) = -2854.238518 au

H(SMD/M06-2X/6-31G(d)) = -2853.850462 au

G(SMD/M06-2X/6-31G(d)) = -2853.973441 au

E(SMD/M06-2X/def2-TZVP//SMD/M06-2X /6-31G(d)) = -2855.457137 au

|   |             |             |             |
|---|-------------|-------------|-------------|
| C | 2.51329100  | 0.31198700  | -1.34520900 |
| N | 2.08481400  | -1.64044300 | -1.35107800 |
| N | 2.15643700  | -2.73591900 | -1.30560200 |
| C | 3.91150100  | 0.37110700  | -1.34121300 |
| C | 4.62581300  | 0.32247100  | -0.11619200 |
| C | 4.62537000  | 0.49628300  | -2.55776700 |
| C | 6.00108900  | 0.41770800  | -0.11770900 |
| H | 4.07152800  | 0.21983300  | 0.81217300  |
| C | 6.00328900  | 0.59594600  | -2.54187100 |
| H | 4.07241800  | 0.52012900  | -3.49160900 |
| C | 6.70761800  | 0.55842600  | -1.32726600 |
| H | 6.55177000  | 0.38662100  | 0.81782100  |
| H | 6.55317600  | 0.70168100  | -3.47200100 |
| C | 1.26298100  | 0.81214500  | -1.23518300 |
| O | 0.17370300  | 0.11189500  | -1.33808000 |
| O | 1.08488900  | 2.12579000  | -1.08069400 |
| C | 2.18973400  | 2.96437100  | -0.73091100 |
| H | 2.68280100  | 2.58567100  | 0.16816000  |
| H | 2.90136700  | 3.03381500  | -1.55850400 |
| H | 1.75360400  | 3.94305700  | -0.53528700 |
| B | -0.79867100 | -0.09016500 | -0.17137600 |
| C | -1.29833100 | 1.33700900  | 0.46091400  |
| C | -1.75086400 | 2.32844400  | -0.40701200 |
| C | -1.43620900 | 1.63500800  | 1.80978300  |
| C | -2.25970100 | 3.54660100  | 0.01383300  |
| C | -1.94640400 | 2.84188100  | 2.27697100  |
| C | -2.35905700 | 3.80519100  | 1.37344000  |
| C | 0.03496700  | -1.04354800 | 0.87745500  |
| C | -0.10980500 | -2.41918700 | 1.01645200  |
| C | 1.12161800  | -0.51066800 | 1.56711500  |
| C | 0.75224300  | -3.21126500 | 1.76858900  |
| C | 2.01062900  | -1.25902700 | 2.32183700  |
| C | 1.82823300  | -2.63004300 | 2.41814700  |

|   |             |             |             |
|---|-------------|-------------|-------------|
| C | -2.14545400 | -0.77364600 | -0.78535700 |
| C | -3.11851300 | -1.21358100 | 0.10791300  |
| C | -2.50383400 | -0.84923000 | -2.12507500 |
| C | -4.34797700 | -1.72252900 | -0.27117400 |
| C | -3.73105300 | -1.35245400 | -2.55085200 |
| C | -4.65726500 | -1.79196900 | -1.62266800 |
| F | -1.07246400 | 0.75491300  | 2.75638400  |
| F | -2.04494900 | 3.07586600  | 3.58916800  |
| F | -2.85073900 | 4.96775300  | 1.80295500  |
| F | -2.66593800 | 4.46464900  | -0.86852000 |
| F | -1.70660000 | 2.12181700  | -1.73186800 |
| F | -2.86116900 | -1.15974700 | 1.42712900  |
| F | -5.23314500 | -2.14018700 | 0.63800700  |
| F | -5.83498100 | -2.27538200 | -2.01925700 |
| F | -4.02185300 | -1.40738200 | -3.85441800 |
| F | -1.68381300 | -0.43662900 | -3.10099900 |
| F | 1.36335400  | 0.81425000  | 1.51184000  |
| F | 3.04707100  | -0.67695300 | 2.93439800  |
| F | 2.67015000  | -3.37414100 | 3.13217900  |
| F | 0.56003900  | -4.52896700 | 1.85438000  |
| F | -1.09274300 | -3.08420600 | 0.39068800  |
| C | 8.20051300  | 0.68971400  | -1.30699800 |
| H | 8.47713900  | 1.70495300  | -0.99769800 |
| H | 8.64342800  | -0.00178300 | -0.58463300 |
| H | 8.63210900  | 0.50612900  | -2.29314400 |

**I'•B(C<sub>6</sub>F<sub>5</sub>)<sub>3</sub> (R = F, R' = OMe)**

E(SMD/M06-2X/6-31G(d)) = -2914.144204 au

H(SMD/M06-2X/6-31G(d)) = -2913.79298 au

G(SMD/M06-2X/6-31G(d)) = -2913.9134 au

E(SMD/M06-2X/def2-TZVP//SMD/M06-2X /6-31G(d)) = -2915.396607 au

|   |            |             |             |
|---|------------|-------------|-------------|
| C | 2.52266000 | 0.32946500  | -1.34836000 |
| N | 2.09919600 | -1.63651500 | -1.35076200 |
| N | 2.15806900 | -2.73255100 | -1.30357100 |
| C | 3.92009400 | 0.38864200  | -1.34738800 |
| C | 4.63264600 | 0.34921000  | -0.12015300 |
| C | 4.62881600 | 0.50548500  | -2.57039800 |
| C | 6.00807700 | 0.44465800  | -0.11232900 |
| H | 4.07843000 | 0.25474900  | 0.80849500  |
| C | 6.00505500 | 0.60579700  | -2.56939300 |
| H | 4.07217000 | 0.52405900  | -3.50158500 |
| C | 6.66095400 | 0.57118900  | -1.33923400 |
| H | 6.58768600 | 0.42749600  | 0.80349900  |
| H | 6.58174400 | 0.70740900  | -3.48158800 |
| C | 1.26886700 | 0.82143700  | -1.23434900 |
| O | 0.18582500 | 0.11343400  | -1.33307100 |
| O | 1.08431900 | 2.13344800  | -1.08161900 |
| C | 2.18624800 | 2.98043900  | -0.74145700 |
| H | 2.68409500 | 2.61038900  | 0.15860100  |
| H | 2.89405800 | 3.04820100  | -1.57248500 |
| H | 1.74563000 | 3.95798600  | -0.55075500 |

|   |             |             |             |
|---|-------------|-------------|-------------|
| B | -0.78843300 | -0.09141600 | -0.16625900 |
| C | -1.29276700 | 1.33468500  | 0.46340900  |
| C | -1.75102900 | 2.32205600  | -0.40612600 |
| C | -1.42950100 | 1.63510600  | 1.81183700  |
| C | -2.26490200 | 3.53874900  | 0.01267700  |
| C | -1.94462300 | 2.84064800  | 2.27702800  |
| C | -2.36336700 | 3.79985200  | 1.37190000  |
| C | 0.04873000  | -1.04071900 | 0.88300900  |
| C | -0.09363900 | -2.41606600 | 1.02732200  |
| C | 1.13574100  | -0.50360800 | 1.56875000  |
| C | 0.77104400  | -3.20383500 | 1.78108900  |
| C | 2.02753400  | -1.24760700 | 2.32444200  |
| C | 1.84717200  | -2.61850400 | 2.42669300  |
| C | -2.13102100 | -0.78058100 | -0.78203900 |
| C | -3.10426600 | -1.22190000 | 0.11033200  |
| C | -2.48629700 | -0.86036000 | -2.12230500 |
| C | -4.33109100 | -1.73611100 | -0.27014500 |
| C | -3.71074500 | -1.36902300 | -2.54947900 |
| C | -4.63726100 | -1.80974000 | -1.62214800 |
| F | -1.05975200 | 0.75884200  | 2.75956600  |
| F | -2.04197100 | 3.07725000  | 3.58875700  |
| F | -2.85975200 | 4.96100200  | 1.79951900  |
| F | -2.67658900 | 4.45287500  | -0.87108600 |
| F | -1.70681000 | 2.11257800  | -1.73057600 |
| F | -2.84943200 | -1.16423700 | 1.42983800  |
| F | -5.21660000 | -2.15487900 | 0.63808500  |
| F | -5.81228900 | -2.29838100 | -2.02004900 |
| F | -3.99858800 | -1.42796700 | -3.85347400 |
| F | -1.66561300 | -0.44670700 | -3.09725300 |
| F | 1.37496700  | 0.82172800  | 1.50786700  |
| F | 3.06443100  | -0.66146200 | 2.93245200  |
| F | 2.69145600  | -3.35848400 | 3.14199300  |
| F | 0.58111100  | -4.52136400 | 1.87216000  |
| F | -1.07624000 | -3.08508400 | 0.40566300  |
| F | 7.98473400  | 0.66529200  | -1.33392300 |

**1'•B(C<sub>6</sub>F<sub>5</sub>)<sub>3</sub> (R = H, R' = OMe)**

E(SMD/M06-2X/6-31G(d)) = -2814.937673 au

H(SMD/M06-2X/6-31G(d)) = -2814.579064 au

G(SMD/M06-2X/6-31G(d)) = -2814.699649 au

E(SMD/M06-2X/def2-TZVP//SMD/M06-2X /6-31G(d)) = -2816.142177 au

|   |            |             |             |
|---|------------|-------------|-------------|
| C | 2.63574400 | 0.41831600  | -1.52252700 |
| N | 2.28801100 | -1.58198600 | -1.46136400 |
| N | 2.38416400 | -2.67460400 | -1.40038700 |
| C | 4.03376900 | 0.51158200  | -1.56917200 |
| C | 4.78419500 | 0.50980400  | -0.36674500 |
| C | 4.69366700 | 0.63083800  | -2.81644400 |
| C | 6.15949300 | 0.64387300  | -0.41729400 |
| H | 4.26144200 | 0.41295300  | 0.57988800  |
| C | 6.07027700 | 0.77030800  | -2.85335900 |
| H | 4.10229000 | 0.62099400  | -3.72648400 |

|   |             |             |             |
|---|-------------|-------------|-------------|
| C | 6.79504200  | 0.77424900  | -1.65750900 |
| H | 6.74355800  | 0.65123300  | 0.49642000  |
| H | 6.58541100  | 0.87458200  | -3.80195900 |
| C | 1.37235100  | 0.86435800  | -1.34962900 |
| O | 0.31164400  | 0.11766600  | -1.38476300 |
| O | 1.15012500  | 2.17293100  | -1.21376500 |
| C | 2.23920900  | 3.06234800  | -0.94689100 |
| H | 2.78893400  | 2.73300000  | -0.06121500 |
| H | 2.90630600  | 3.12799500  | -1.81125900 |
| H | 1.77704300  | 4.03101000  | -0.76217100 |
| B | -0.60359300 | -0.09776300 | -0.17319600 |
| C | -1.11725600 | 1.32079100  | 0.46668500  |
| C | -1.64561700 | 2.28548200  | -0.38843800 |
| C | -1.19897700 | 1.63072800  | 1.81752600  |
| C | -2.17513200 | 3.49071000  | 0.04381300  |
| C | -1.72701400 | 2.82530900  | 2.29621900  |
| C | -2.21650700 | 3.76258900  | 1.40385200  |
| C | 0.30375400  | -1.01364800 | 0.84620600  |
| C | 0.20321300  | -2.39013600 | 1.01225700  |
| C | 1.40509900  | -0.44016000 | 1.47733200  |
| C | 1.11841100  | -3.14542900 | 1.73919600  |
| C | 2.34637300  | -1.15096600 | 2.20433900  |
| C | 2.20471300  | -2.52428600 | 2.33225300  |
| C | -1.95484500 | -0.82674000 | -0.72048600 |
| C | -2.87399400 | -1.28498300 | 0.21942200  |
| C | -2.36965200 | -0.92637100 | -2.04222100 |
| C | -4.10303400 | -1.83444500 | -0.09985700 |
| C | -3.59859700 | -1.47061600 | -2.40819300 |
| C | -4.46915400 | -1.92765800 | -1.43562600 |
| F | -0.76027500 | 0.77492200  | 2.75451900  |
| F | -1.76875700 | 3.07229200  | 3.60897700  |
| F | -2.72590600 | 4.91310900  | 1.84471200  |
| F | -2.65557500 | 4.38333200  | -0.82711100 |
| F | -1.65895000 | 2.06344200  | -1.71146600 |
| F | -2.56094500 | -1.20799700 | 1.52532700  |
| F | -4.93462900 | -2.26771700 | 0.85155900  |
| F | -5.64799000 | -2.45012400 | -1.77514900 |
| F | -3.94525100 | -1.54820000 | -3.69679300 |
| F | -1.60646800 | -0.49838300 | -3.05693700 |
| F | 1.60762100  | 0.88990200  | 1.38884400  |
| F | 3.39071000  | -0.53016200 | 2.76273300  |
| F | 3.09580900  | -3.23313200 | 3.02199100  |
| F | 0.96695500  | -4.46604700 | 1.85469800  |
| F | -0.78687800 | -3.09172400 | 0.44037500  |
| H | 7.87516700  | 0.88168700  | -1.69152800 |

**I'•B(C<sub>6</sub>F<sub>5</sub>)<sub>3</sub> (R = Cl, R' = OMe)**

E(SMD/M06-2X/6-31G(d)) = -3274.506638 au

H(SMD/M06-2X/6-31G(d)) = -3274.156807 au

G(SMD/M06-2X/6-31G(d)) = -3274.279654 au

E(SMD/M06-2X/def2-TZVP//SMD/M06-2X /6-31G(d)) = -3275.745395 au

|   |             |             |             |
|---|-------------|-------------|-------------|
| C | 2.31278300  | 0.28016300  | -1.43998800 |
| N | 1.84307000  | -1.69779500 | -1.38865000 |
| N | 1.82356000  | -2.79522200 | -1.42881000 |
| C | 3.70912700  | 0.29624500  | -1.30608500 |
| C | 4.30712100  | 0.38472200  | -0.02478500 |
| C | 4.52830900  | 0.23039600  | -2.45847000 |
| C | 5.68170300  | 0.43031000  | 0.10005100  |
| H | 3.67415500  | 0.43123400  | 0.85519200  |
| C | 5.90454900  | 0.26863100  | -2.33898300 |
| H | 4.06112300  | 0.15353400  | -3.43488500 |
| C | 6.46053200  | 0.36841900  | -1.06025100 |
| H | 6.15363900  | 0.51011100  | 1.07280600  |
| H | 6.54554300  | 0.22527500  | -3.21225900 |
| C | 1.06568200  | 0.78979400  | -1.29620200 |
| O | -0.02201400 | 0.08716200  | -1.35845900 |
| O | 0.89205700  | 2.10709700  | -1.20944500 |
| C | 2.00764300  | 2.96578100  | -0.94793500 |
| B | -0.98162300 | -0.08713400 | -0.17529700 |
| C | -1.48616600 | 1.35925100  | 0.40647400  |
| C | -1.95332300 | 2.31306700  | -0.49524100 |
| C | -1.61435800 | 1.70892500  | 1.74401000  |
| C | -2.46797300 | 3.54295700  | -0.11747000 |
| C | -2.12967000 | 2.92913900  | 2.16844300  |
| C | -2.55752400 | 3.85358800  | 1.23178900  |
| C | -0.13214900 | -0.99322100 | 0.90126600  |
| C | -0.27002500 | -2.36170600 | 1.10447400  |
| C | 0.94817900  | -0.42384100 | 1.56994700  |
| C | 0.58748100  | -3.11083600 | 1.90469200  |
| C | 1.83160700  | -1.12790600 | 2.37182500  |
| C | 1.65168000  | -2.49248100 | 2.53871000  |
| C | -2.32433500 | -0.80535500 | -0.75516200 |
| C | -3.28814000 | -1.21868300 | 0.16054100  |
| C | -2.68753800 | -0.93951100 | -2.08897600 |
| C | -4.51366100 | -1.75586400 | -0.19133500 |
| C | -3.91098500 | -1.47307100 | -2.48758400 |
| C | -4.82809700 | -1.88397700 | -1.53735700 |
| F | -1.23586600 | 0.86871900  | 2.72051600  |
| F | -2.21836600 | 3.21300900  | 3.47127600  |
| F | -3.05415300 | 5.02824100  | 1.62008400  |
| F | -2.88912900 | 4.42233300  | -1.03131900 |
| F | -1.92092300 | 2.05499700  | -1.81133900 |
| F | -3.02480900 | -1.10784000 | 1.47500400  |
| F | -5.39018800 | -2.14511200 | 0.73840300  |
| F | -6.00190300 | -2.39635400 | -1.90778800 |
| F | -4.20669500 | -1.58585200 | -3.78616400 |
| F | -1.87584300 | -0.55857200 | -3.08460300 |
| F | 1.19250600  | 0.89721800  | 1.44180200  |
| F | 2.85863800  | -0.50875300 | 2.96374900  |
| F | 2.48801300  | -3.19499800 | 3.29934000  |
| F | 0.40104100  | -4.42360300 | 2.05269200  |



|                                                                                    |             |             |             |
|------------------------------------------------------------------------------------|-------------|-------------|-------------|
| F                                                                                  | -1.24207500 | -3.06156300 | 0.50094300  |
| H                                                                                  | 2.70869300  | 2.95534900  | -1.78749400 |
| H                                                                                  | 1.58035200  | 3.96108400  | -0.83629700 |
| H                                                                                  | 2.50802500  | 2.66689000  | -0.02347400 |
| Cl                                                                                 | 8.18428800  | 0.41781200  | -0.90549400 |
| <b>I'•B(C<sub>6</sub>F<sub>5</sub>)<sub>3</sub> (R = CF<sub>3</sub>, R' = OMe)</b> |             |             |             |
| E(SMD/M06-2X/6-31G(d)) = -3151.869293 au                                           |             |             |             |
| H(SMD/M06-2X/6-31G(d)) = -3151.502289 au                                           |             |             |             |
| G(SMD/M06-2X/6-31G(d)) = -3151.631129 au                                           |             |             |             |
| E(SMD/M06-2X/def2-TZVP//SMD/M06-2X /6-31G(d)) = -3153.227888 au                    |             |             |             |
| C                                                                                  | 1.98998900  | 0.26558100  | -1.33648300 |
| N                                                                                  | 1.49289100  | -1.74273200 | -1.31416700 |
| N                                                                                  | 1.41719100  | -2.83746000 | -1.35457400 |
| C                                                                                  | 3.38562900  | 0.24295000  | -1.16049700 |
| C                                                                                  | 3.93984400  | 0.31050900  | 0.13810100  |
| C                                                                                  | 4.23215500  | 0.16568700  | -2.29147000 |
| C                                                                                  | 5.31535200  | 0.32040400  | 0.30171700  |
| H                                                                                  | 3.27883500  | 0.36723300  | 0.99638000  |
| C                                                                                  | 5.60460200  | 0.16954600  | -2.12227400 |
| H                                                                                  | 3.78979500  | 0.10679000  | -3.28034100 |
| C                                                                                  | 6.12896400  | 0.24650500  | -0.82862200 |
| H                                                                                  | 5.75271300  | 0.37974500  | 1.29167900  |
| H                                                                                  | 6.26936300  | 0.11393200  | -2.97842700 |
| C                                                                                  | 0.74289900  | 0.78187400  | -1.22430600 |
| O                                                                                  | -0.34529700 | 0.08689000  | -1.32343800 |
| O                                                                                  | 0.58145900  | 2.09972400  | -1.13307700 |
| C                                                                                  | 1.70133200  | 2.94270700  | -0.83630700 |
| B                                                                                  | -1.34634800 | -0.08243000 | -0.17157500 |
| C                                                                                  | -1.86366300 | 1.36740400  | 0.38880100  |
| C                                                                                  | -2.29325600 | 2.32227700  | -0.53034100 |
| C                                                                                  | -2.03623100 | 1.72005700  | 1.72057400  |
| C                                                                                  | -2.81357400 | 3.55573300  | -0.17251200 |
| C                                                                                  | -2.55894100 | 2.94389400  | 2.12493500  |
| C                                                                                  | -2.94834900 | 3.86915900  | 1.17232800  |
| C                                                                                  | -0.53606400 | -0.98849400 | 0.93406800  |
| C                                                                                  | -0.68638800 | -2.35569000 | 1.13754700  |
| C                                                                                  | 0.52376400  | -0.42106800 | 1.63613400  |
| C                                                                                  | 0.14063000  | -3.10515800 | 1.96894000  |
| C                                                                                  | 1.37738900  | -1.12576500 | 2.46905900  |
| C                                                                                  | 1.18613100  | -2.48887600 | 2.63529700  |
| C                                                                                  | -2.66999400 | -0.79735000 | -0.79633700 |
| C                                                                                  | -3.66457900 | -1.20781700 | 0.08713300  |
| C                                                                                  | -2.98943500 | -0.92992300 | -2.14141500 |
| C                                                                                  | -4.87974900 | -1.74044900 | -0.30505700 |
| C                                                                                  | -4.20119600 | -1.45852200 | -2.58025700 |
| C                                                                                  | -5.15045000 | -1.86642900 | -1.66076900 |
| F                                                                                  | -1.69599500 | 0.87940200  | 2.71059000  |
| F                                                                                  | -2.69168700 | 3.23053800  | 3.42331200  |
| F                                                                                  | -3.45118000 | 5.04737700  | 1.54104600  |
| F                                                                                  | -3.19656100 | 4.43638600  | -1.10174300 |

|   |             |             |             |
|---|-------------|-------------|-------------|
| F | -2.21424000 | 2.06244500  | -1.84422100 |
| F | -3.44381600 | -1.09809500 | 1.40940400  |
| F | -5.78750400 | -2.12721300 | 0.59519700  |
| F | -6.31328900 | -2.37421800 | -2.06978200 |
| F | -4.45477300 | -1.56927300 | -3.88785000 |
| F | -2.14360200 | -0.55194400 | -3.10934700 |
| F | 0.77840100  | 0.89829600  | 1.51057900  |
| F | 2.38863500  | -0.50890200 | 3.08979700  |
| F | 1.99442500  | -3.19192600 | 3.42505700  |
| F | -0.05610800 | -4.41654100 | 2.11515600  |
| F | -1.63961500 | -3.05402700 | 0.50320000  |
| C | 7.63148800  | 0.26827100  | -0.68538600 |
| F | 8.14049900  | 1.40045300  | -1.19018600 |
| F | 8.19221700  | -0.74755600 | -1.35420400 |
| F | 8.02205700  | 0.18129400  | 0.58897300  |
| H | 2.42704500  | 2.92294400  | -1.65476700 |
| H | 1.28531200  | 3.94389000  | -0.73657400 |
| H | 2.16822400  | 2.63546500  | 0.10281300  |

**I'•B(C<sub>6</sub>F<sub>5</sub>)<sub>3</sub> (R = CN, R' = OMe)**

E(SMD/M06-2X/6-31G(d)) = -2907.147285 au

H(SMD/M06-2X/6-31G(d)) = -2906.788609 au

G(SMD/M06-2X/6-31G(d)) = -2906.913566 au

E(SMD/M06-2X/def2-TZVP//SMD/M06-2X /6-31G(d)) = -2908.386191 au

|   |             |             |             |
|---|-------------|-------------|-------------|
| C | 2.36479400  | 0.31866800  | -1.53996100 |
| N | 1.91470700  | -1.70383900 | -1.42348300 |
| N | 1.84730200  | -2.79983700 | -1.42792500 |
| C | 3.76631700  | 0.32614300  | -1.39143300 |
| C | 4.35122300  | 0.44940700  | -0.10927300 |
| C | 4.58428800  | 0.21768700  | -2.53885700 |
| C | 5.72725000  | 0.48282500  | 0.02089200  |
| H | 3.71261400  | 0.53303900  | 0.76308400  |
| C | 5.96189800  | 0.24550800  | -2.41148700 |
| H | 4.11781600  | 0.11561900  | -3.51295400 |
| C | 6.51917700  | 0.37779300  | -1.13216200 |
| H | 6.19444100  | 0.58588600  | 0.99369400  |
| H | 6.60644000  | 0.16857500  | -3.27964100 |
| C | 1.11332200  | 0.80751000  | -1.34634900 |
| O | 0.04168200  | 0.08323500  | -1.37074900 |
| O | 0.92286500  | 2.12096700  | -1.27203700 |
| C | 2.03562200  | 2.99983300  | -1.06335800 |
| H | 2.56634900  | 2.72772900  | -0.14755500 |
| H | 2.70905500  | 2.97916100  | -1.92519700 |
| H | 1.59895600  | 3.99181300  | -0.96084300 |
| B | -0.90253100 | -0.08665000 | -0.17073500 |
| C | -1.41478700 | 1.36227600  | 0.39484000  |
| C | -1.91244500 | 2.29312400  | -0.51454500 |
| C | -1.51978300 | 1.73484600  | 1.72813800  |
| C | -2.43634200 | 3.52266200  | -0.14881100 |
| C | -2.04312400 | 2.95569400  | 2.14067700  |
| C | -2.50269400 | 3.85674100  | 1.19624900  |

|   |             |             |             |
|---|-------------|-------------|-------------|
| C | -0.02576800 | -0.96744100 | 0.90384300  |
| C | -0.14834200 | -2.33280500 | 1.13564600  |
| C | 1.06209400  | -0.37689300 | 1.54064600  |
| C | 0.72999700  | -3.05869500 | 1.93475700  |
| C | 1.96625800  | -1.05713700 | 2.33987900  |
| C | 1.80017800  | -2.41942800 | 2.53727000  |
| C | -2.24131900 | -0.83082500 | -0.72409700 |
| C | -3.19028200 | -1.23681200 | 0.21017500  |
| C | -2.61537800 | -0.99814200 | -2.05103900 |
| C | -4.41190700 | -1.79742300 | -0.11774600 |
| C | -3.83537800 | -1.55625300 | -2.42573800 |
| C | -4.73760700 | -1.95831900 | -1.45757500 |
| F | -1.10903300 | 0.91785800  | 2.71109400  |
| F | -2.10844500 | 3.26268600  | 3.43945700  |
| F | -3.00683400 | 5.03168900  | 1.57324700  |
| F | -2.88704400 | 4.37957000  | -1.06962200 |
| F | -1.90013700 | 2.01175500  | -1.82627800 |
| F | -2.91444600 | -1.09494800 | 1.51903200  |
| F | -5.27388700 | -2.17813700 | 0.82879500  |
| F | -5.90795300 | -2.49379300 | -1.80520900 |
| F | -4.14227700 | -1.70152700 | -3.71834800 |
| F | -1.81789800 | -0.62788200 | -3.06211100 |
| F | 1.29334400  | 0.94351100  | 1.37924200  |
| F | 2.99816800  | -0.41767800 | 2.90030300  |
| F | 2.65538800  | -3.10013800 | 3.29636400  |
| F | 0.55785500  | -4.36961000 | 2.11145000  |
| F | -1.12371800 | -3.05259800 | 0.56228500  |
| C | 7.95379800  | 0.40741500  | -0.99651500 |
| N | 9.10463400  | 0.43128200  | -0.88806800 |

**I'•B(C<sub>6</sub>F<sub>5</sub>)<sub>3</sub> (R = NO<sub>2</sub>, R' = OMe)**

E(SMD/M06-2X/6-31G(d)) = -3019.355577 au

H(SMD/M06-2X/6-31G(d)) = -3018.991809 au

G(SMD/M06-2X/6-31G(d)) = -3019.118271 au

E(SMD/M06-2X/def2-TZVP//SMD/M06-2X /6-31G(d)) = -3020.648867 au

|   |             |             |             |
|---|-------------|-------------|-------------|
| C | 2.14911900  | 0.28369000  | -1.56053200 |
| N | 1.67805800  | -1.74911200 | -1.41586700 |
| N | 1.58743700  | -2.84318000 | -1.43834900 |
| C | 3.54297300  | 0.27287400  | -1.32925500 |
| C | 4.06047000  | 0.46498400  | -0.02774700 |
| C | 4.41745700  | 0.08376000  | -2.42238700 |
| C | 5.42992400  | 0.48943900  | 0.17549200  |
| H | 3.37952100  | 0.61142400  | 0.80313500  |
| C | 5.78874500  | 0.09872300  | -2.22484300 |
| H | 4.00250400  | -0.06903200 | -3.41292200 |
| C | 6.25248800  | 0.30380600  | -0.93049300 |
| H | 5.85491700  | 0.64422000  | 1.15947900  |
| H | 6.48443700  | -0.03927800 | -3.04302200 |
| C | 0.89954800  | 0.78768700  | -1.36139700 |
| O | -0.17400200 | 0.07006800  | -1.36454000 |
| O | 0.71874600  | 2.10194600  | -1.33317000 |

|   |             |             |             |
|---|-------------|-------------|-------------|
| C | 1.84691900  | 2.98315800  | -1.24556500 |
| H | 2.40417700  | 2.79752700  | -0.32414100 |
| H | 2.49168600  | 2.86498800  | -2.12154000 |
| H | 1.42396600  | 3.98589100  | -1.23008700 |
| B | -1.12457500 | -0.08955600 | -0.16570800 |
| C | -1.61256200 | 1.36529500  | 0.40434900  |
| C | -2.09809700 | 2.30703800  | -0.50032200 |
| C | -1.71039700 | 1.73367600  | 1.73962700  |
| C | -2.60268200 | 3.54296100  | -0.12845500 |
| C | -2.21456800 | 2.96034000  | 2.15809600  |
| C | -2.66190600 | 3.87221100  | 1.21801400  |
| C | -0.26033500 | -0.98728700 | 0.90330100  |
| C | -0.39953000 | -2.35173500 | 1.12974700  |
| C | 0.83660100  | -0.41296000 | 1.53871500  |
| C | 0.47279200  | -3.09131000 | 1.92304400  |
| C | 1.73510600  | -1.10635500 | 2.33272400  |
| C | 1.55216200  | -2.46737200 | 2.52533400  |
| C | -2.47231800 | -0.81070100 | -0.72602600 |
| C | -3.42706900 | -1.21275000 | 0.20401300  |
| C | -2.84844600 | -0.95859100 | -2.05478000 |
| C | -4.65656400 | -1.75224400 | -0.13000900 |
| C | -4.07621600 | -1.49503600 | -2.43539400 |
| C | -4.98422600 | -1.89440400 | -1.47148200 |
| F | -1.31130100 | 0.90608600  | 2.71829100  |
| F | -2.27360200 | 3.26261900  | 3.45813900  |
| F | -3.14764700 | 5.05281600  | 1.60087500  |
| F | -3.04239300 | 4.41003100  | -1.04488400 |
| F | -2.09405700 | 2.03017600  | -1.81290500 |
| F | -3.14985300 | -1.08750900 | 1.51423700  |
| F | -5.52424800 | -2.13012300 | 0.81234400  |
| F | -6.16204000 | -2.40914100 | -1.82477700 |
| F | -4.38496100 | -1.62166900 | -3.72944300 |
| F | -2.04578400 | -0.58858200 | -3.06177600 |
| F | 1.08352800  | 0.90552200  | 1.37809200  |
| F | 2.77512500  | -0.48153500 | 2.89401100  |
| F | 2.40101700  | -3.16153600 | 3.27910500  |
| F | 0.28574500  | -4.40073000 | 2.09443000  |
| F | -1.38512300 | -3.05658900 | 0.55574700  |
| N | 7.71801400  | 0.32823000  | -0.71521000 |
| O | 8.43033100  | 0.19330400  | -1.69061300 |
| O | 8.11506400  | 0.48200100  | 0.42303100  |

**1a**•B(C<sub>6</sub>F<sub>5</sub>)<sub>3</sub> (R = NMe<sub>2</sub>, R' = OMe)

E(SMD/M06-2X/6-31G(d)) = -2839.407118 au

H(SMD/M06-2X/6-31G(d)) = -2838.978879 au

G(SMD/M06-2X/6-31G(d)) = -2839.10378 au

E(SMD/M06-2X/def2-TZVP//SMD/M06-2X/6-31G(d)) = -2840.619045 au

|   |            |             |            |
|---|------------|-------------|------------|
| C | 2.16842700 | 0.26659400  | 1.93383300 |
| C | 3.46881500 | 0.07441400  | 1.66489900 |
| C | 4.37560400 | -0.46232400 | 2.66040600 |
| C | 4.03663900 | 0.39350800  | 0.36710500 |

|   |             |             |             |
|---|-------------|-------------|-------------|
| C | 5.69145900  | -0.65233900 | 2.40466200  |
| H | 3.96631800  | -0.71138100 | 3.63459400  |
| C | 5.34975700  | 0.20791300  | 0.09661100  |
| H | 3.36981100  | 0.78842000  | -0.39247100 |
| C | 6.23756700  | -0.32204900 | 1.10726400  |
| H | 6.33645800  | -1.05410700 | 3.17517600  |
| H | 5.73679200  | 0.45651200  | -0.88290500 |
| C | 0.90898300  | 0.62841300  | 1.63507400  |
| O | 0.02112100  | -0.26271900 | 1.28263600  |
| O | 0.43650900  | 1.85999800  | 1.86878700  |
| C | 1.41154000  | 2.89004100  | 2.01659800  |
| H | 2.04752600  | 2.69667900  | 2.88749000  |
| H | 2.02649700  | 2.96392300  | 1.11396400  |
| H | 0.85247400  | 3.81324100  | 2.16513100  |
| B | -1.05356100 | -0.17922600 | 0.21726700  |
| C | -1.31313700 | 1.34201500  | -0.36316900 |
| C | -0.23825400 | 2.05472200  | -0.88695400 |
| C | -2.53817900 | 1.98281800  | -0.49812100 |
| C | -0.32773700 | 3.32051100  | -1.43909800 |
| C | -2.68398500 | 3.24781500  | -1.06095600 |
| C | -1.57321700 | 3.92460300  | -1.53192100 |
| C | -2.34703800 | -0.82311500 | 0.99312900  |
| C | -2.92174900 | -2.06943200 | 0.78710600  |
| C | -2.87475800 | -0.11448800 | 2.07052100  |
| C | -3.95942400 | -2.57319900 | 1.56716600  |
| C | -3.90373400 | -0.57453400 | 2.87428800  |
| C | -4.45271700 | -1.82314900 | 2.61846500  |
| C | -0.58097900 | -1.02597400 | -1.10861900 |
| C | -1.49717700 | -1.23370800 | -2.13553300 |
| C | 0.70805000  | -1.45892300 | -1.38453000 |
| C | -1.19164800 | -1.85109400 | -3.33621000 |
| C | 1.06384300  | -2.08072200 | -2.57819400 |
| C | 0.10936000  | -2.28094600 | -3.55899200 |
| F | -3.67778700 | 1.40835700  | -0.08352300 |
| F | -3.89162600 | 3.81158400  | -1.15376700 |
| F | -1.69586500 | 5.13910700  | -2.06776800 |
| F | 0.76046500  | 3.95366200  | -1.88805900 |
| F | 0.99784400  | 1.51211100  | -0.84404900 |
| F | -2.76794900 | -0.82561800 | -1.96863600 |
| F | -2.12231400 | -2.03186400 | -4.27783300 |
| F | 0.43463200  | -2.87510600 | -4.70823100 |
| F | 2.32410700  | -2.47725500 | -2.78680800 |
| F | 1.71094500  | -1.28468100 | -0.50630700 |
| F | -2.38892000 | 1.10328000  | 2.35840000  |
| F | -4.37120000 | 0.16253000  | 3.88675500  |
| F | -5.44285000 | -2.29212600 | 3.37874900  |
| F | -4.47131200 | -3.78217400 | 1.31527000  |
| F | -2.49664300 | -2.88786100 | -0.19005600 |
| N | 7.52349000  | -0.49982400 | 0.84865400  |
| C | 8.43037500  | -1.03244000 | 1.86974300  |

|   |            |             |             |
|---|------------|-------------|-------------|
| H | 9.43149400 | -1.09192900 | 1.44951800  |
| H | 8.45008700 | -0.37356600 | 2.74185300  |
| H | 8.11383700 | -2.03301700 | 2.17632400  |
| C | 8.07938000 | -0.16851100 | -0.46696700 |
| H | 7.94222700 | 0.89436500  | -0.68228800 |
| H | 9.14323200 | -0.39327000 | -0.46170000 |
| H | 7.59544100 | -0.76324600 | -1.24585900 |

**1a•B(C<sub>6</sub>F<sub>5</sub>)<sub>3</sub> (R = NH<sub>2</sub>, R' = OMe)**

E(SMD/M06-2X/6-31G(d)) = -2760.832245 au

H(SMD/M06-2X/6-31G(d)) = -2760.464661 au

G(SMD/M06-2X/6-31G(d)) = -2760.582727 au

E(SMD/M06-2X/def2-TZVP//SMD/M06-2X/6-31G(d)) = -2762.019963 au

|   |             |             |             |
|---|-------------|-------------|-------------|
| C | -2.44921400 | 0.70193000  | -2.03483700 |
| C | -3.75195000 | 0.40257200  | -1.90203700 |
| C | -4.57486100 | 0.11887400  | -3.06282100 |
| C | -4.39406300 | 0.34553300  | -0.59924300 |
| C | -5.88867000 | -0.18682200 | -2.94548500 |
| H | -4.10098000 | 0.15752700  | -4.03859900 |
| C | -5.70678900 | 0.04174200  | -0.47017200 |
| H | -3.78370100 | 0.55191100  | 0.27381200  |
| C | -6.49293500 | -0.23574400 | -1.64200700 |
| H | -6.50558000 | -0.40170000 | -3.81250800 |
| H | -6.18920300 | -0.00329400 | 0.50121300  |
| C | -1.23745500 | 1.00229700  | -1.52629900 |
| O | -0.34247500 | 0.07053600  | -1.35457800 |
| O | -0.81230900 | 2.26093100  | -1.37193100 |
| C | -1.82456200 | 3.26568400  | -1.32558200 |
| H | -2.37798200 | 3.29752300  | -2.27053800 |
| H | -2.51176200 | 3.07450100  | -0.49542000 |
| H | -1.30329500 | 4.20945000  | -1.17009000 |
| B | 0.67509600  | -0.10761700 | -0.24307200 |
| C | 0.81062200  | 1.18928800  | 0.76403600  |
| C | -0.33444000 | 1.68514200  | 1.38054900  |
| C | 1.98751500  | 1.80219400  | 1.17510400  |
| C | -0.35169800 | 2.73960400  | 2.27649500  |
| C | 2.02543700  | 2.85636300  | 2.08358100  |
| C | 0.85005800  | 3.33140900  | 2.63741600  |
| C | 2.04034900  | -0.44440300 | -1.08569400 |
| C | 2.65120300  | -1.68154600 | -1.23629600 |
| C | 2.59937700  | 0.57332900  | -1.85552200 |
| C | 3.75062500  | -1.89820600 | -2.06268400 |
| C | 3.69093600  | 0.40578300  | -2.69068400 |
| C | 4.27387900  | -0.84904100 | -2.79564500 |
| C | 0.18167600  | -1.31906900 | 0.74890400  |
| C | 1.06291100  | -1.80442700 | 1.71079400  |
| C | -1.10379600 | -1.83618100 | 0.82440300  |
| C | 0.73036600  | -2.75717500 | 2.65835100  |
| C | -1.48573300 | -2.79194700 | 1.76190000  |
| C | -0.56419400 | -3.25796900 | 2.68195500  |
| F | 3.18136200  | 1.40812600  | 0.70674900  |

|   |             |             |             |
|---|-------------|-------------|-------------|
| F | 3.19120600  | 3.40955000  | 2.42922000  |
| F | 0.87025000  | 4.34194500  | 3.50657200  |
| F | -1.50040400 | 3.17951400  | 2.79916700  |
| F | -1.53298400 | 1.13579100  | 1.08614600  |
| F | 2.32417000  | -1.33766000 | 1.73461900  |
| F | 1.62803800  | -3.19197000 | 3.54735800  |
| F | -0.91576900 | -4.17297500 | 3.58659000  |
| F | -2.74012100 | -3.25520300 | 1.78571300  |
| F | -2.07735800 | -1.42475200 | -0.00671400 |
| F | 2.08010800  | 1.80959600  | -1.79020400 |
| F | 4.18534800  | 1.42968600  | -3.39340200 |
| F | 5.32454200  | -1.03871400 | -3.59448600 |
| F | 4.29363600  | -3.11556400 | -2.16261900 |
| F | 2.20196700  | -2.77011700 | -0.58951100 |
| N | -7.77099600 | -0.53462600 | -1.51974200 |
| H | -8.21640500 | -0.57793500 | -0.60886400 |
| H | -8.34480600 | -0.73985000 | -2.33105300 |

**1a**•B(C<sub>6</sub>F<sub>5</sub>)<sub>3</sub> (R = OMe, R' = OMe)

E(SMD/M06-2X/6-31G(d)) = -2819.959076 au

H(SMD/M06-2X/6-31G(d)) = -2819.573768 au

G(SMD/M06-2X/6-31G(d)) = -2819.692595 au

E(SMD/M06-2X/def2-TZVP//SMD/M06-2X/6-31G(d)) = -2821.16845 au

|   |             |             |             |
|---|-------------|-------------|-------------|
| C | 2.30444100  | 0.71816200  | -1.38715600 |
| C | 3.61805400  | 0.44959900  | -1.27940200 |
| C | 4.31871300  | 0.63646500  | -0.02830800 |
| C | 4.36901300  | -0.02082300 | -2.41813100 |
| C | 5.64813900  | 0.37311400  | 0.06620800  |
| H | 3.76375500  | 1.01518200  | 0.82388100  |
| C | 5.70228100  | -0.29637500 | -2.32616500 |
| H | 3.84053900  | -0.15899200 | -3.35597900 |
| C | 6.35521900  | -0.10001500 | -1.07795500 |
| H | 6.20394300  | 0.51205300  | 0.98680700  |
| H | 6.25188700  | -0.65496200 | -3.18764800 |
| C | 1.00494200  | 0.98100400  | -1.48414100 |
| O | 0.11923200  | 0.01664100  | -1.39887000 |
| O | 0.52221900  | 2.20863100  | -1.71239000 |
| C | 1.47641900  | 3.26900200  | -1.68299900 |
| H | 1.98911000  | 3.28837600  | -0.71570300 |
| H | 2.20549700  | 3.15325100  | -2.49257500 |
| H | 0.91048600  | 4.18843700  | -1.82575600 |
| B | -0.80185600 | -0.12960700 | -0.20035500 |
| C | -1.71991200 | 1.21634000  | 0.02228800  |
| C | -2.34706800 | 1.78436800  | -1.08447100 |
| C | -2.04426500 | 1.80366900  | 1.23836800  |
| C | -3.19084700 | 2.88195600  | -1.01399100 |

|   |             |             |             |
|---|-------------|-------------|-------------|
| C | -2.88879000 | 2.90231200  | 1.35659200  |
| C | -3.46400500 | 3.44798000  | 0.22236400  |
| C | 0.18334100  | -0.48440300 | 1.06730400  |
| C | 0.41074600  | -1.75478000 | 1.58427000  |
| C | 0.98381500  | 0.50942400  | 1.62364500  |
| C | 1.33844400  | -2.02565400 | 2.58487000  |
| C | 1.92463100  | 0.28656700  | 2.61589200  |
| C | 2.11069300  | -0.99908100 | 3.09936400  |
| C | -1.87824100 | -1.30383300 | -0.56398100 |
| C | -2.75087600 | -1.72436900 | 0.43615000  |
| C | -2.11754000 | -1.85425200 | -1.81674800 |
| C | -3.77149200 | -2.63887700 | 0.24450400  |
| C | -3.13411100 | -2.77688000 | -2.05460900 |
| C | -3.96501000 | -3.17202100 | -1.02230900 |
| F | -1.54577100 | 1.33198600  | 2.39305700  |
| F | -3.15332100 | 3.43172400  | 2.55549400  |
| F | -4.27642300 | 4.50154300  | 0.31707800  |
| F | -3.75242500 | 3.38941700  | -2.11618200 |
| F | -2.15315500 | 1.25956100  | -2.30389200 |
| F | -2.60469800 | -1.22858300 | 1.67841200  |
| F | -4.56813600 | -3.00730000 | 1.25198500  |
| F | -4.94246400 | -4.05316400 | -1.23988200 |
| F | -3.31597600 | -3.27984500 | -3.28013000 |
| F | -1.37900000 | -1.52927000 | -2.88672400 |
| F | 0.86714700  | 1.78249500  | 1.19852500  |
| F | 2.68751500  | 1.28839900  | 3.07006300  |
| F | 3.01997700  | -1.24102900 | 4.04275700  |
| F | 1.50428100  | -3.27166400 | 3.03659600  |
| F | -0.26516800 | -2.82262100 | 1.13126200  |
| O | 7.62948600  | -0.32636300 | -0.88480000 |
| C | 8.45241600  | -0.79605700 | -1.96521300 |
| H | 8.45386900  | -0.06819300 | -2.77965600 |
| H | 9.45068500  | -0.89068200 | -1.54317400 |
| H | 8.09567700  | -1.76779800 | -2.31317000 |

**1a**•B(C<sub>6</sub>F<sub>5</sub>)<sub>3</sub> (R = Me, R' = OMe)

E(SMD/M06-2X/6-31G(d)) = -2744.766292 au

H(SMD/M06-2X/6-31G(d)) = -2744.390193 au

G(SMD/M06-2X/6-31G(d)) = -2744.504611 au

E(SMD/M06-2X/def2-TZVP//SMD/M06-2X /6-31G(d)) = -2745.941309 au

|   |            |             |             |
|---|------------|-------------|-------------|
| C | 2.93957000 | -0.93308800 | -0.87837300 |
| C | 4.21636600 | -0.52457400 | -0.56130900 |
| C | 5.20115500 | -1.51082400 | -0.23679300 |
| C | 4.60144400 | 0.85478400  | -0.54339800 |



|   |             |             |             |
|---|-------------|-------------|-------------|
| C | 6.48230700  | -1.13746300 | 0.08746300  |
| H | 4.90325400  | -2.55439100 | -0.25151200 |
| C | 5.88860500  | 1.21333500  | -0.22073400 |
| H | 3.85798400  | 1.60917700  | -0.78534200 |
| C | 6.84372300  | 0.22650100  | 0.09954300  |
| H | 7.23006200  | -1.88392000 | 0.33752700  |
| H | 6.18228000  | 2.25798000  | -0.20647800 |
| C | 1.75508100  | -0.26003900 | -1.14567700 |
| O | 1.05044100  | 0.15032200  | -0.15884600 |
| O | 1.26633000  | -0.15485700 | -2.36272300 |
| C | 2.03494400  | -0.74524600 | -3.42278800 |
| H | 3.00238400  | -0.24528600 | -3.51748300 |
| H | 2.17072900  | -1.81270200 | -3.22409500 |
| H | 1.44886400  | -0.59660700 | -4.32784900 |
| B | -0.46709800 | 0.14866100  | 0.09824700  |
| C | -1.33675200 | -0.46686300 | -1.14723800 |
| C | -1.00078300 | -1.71930200 | -1.65375600 |
| C | -2.49164700 | 0.08328300  | -1.68829500 |
| C | -1.70465400 | -2.37157700 | -2.65157500 |
| C | -3.23804700 | -0.53821300 | -2.68468900 |
| C | -2.84304500 | -1.77200300 | -3.17096300 |
| C | -0.76455400 | 1.72343900  | 0.41780200  |
| C | -1.07667600 | 2.28919600  | 1.64657800  |
| C | -0.60640500 | 2.63975300  | -0.61936300 |
| C | -1.24576500 | 3.65793900  | 1.83618300  |
| C | -0.76216800 | 4.00801100  | -0.47770300 |
| C | -1.08692000 | 4.52324300  | 0.76918900  |
| C | -0.74604900 | -0.86920600 | 1.34691300  |
| C | -2.03535200 | -0.92779700 | 1.86851900  |
| C | 0.14240600  | -1.79494000 | 1.87673500  |
| C | -2.42938900 | -1.80262700 | 2.86549500  |
| C | -0.21051100 | -2.69487100 | 2.87912600  |
| C | -1.50091300 | -2.69895600 | 3.37713900  |
| F | -2.96167400 | 1.26769600  | -1.26947900 |
| F | -4.33678300 | 0.04496000  | -3.17073600 |
| F | -3.54661200 | -2.37801700 | -4.12659400 |
| F | -1.31077000 | -3.56410700 | -3.10621500 |
| F | 0.08845600  | -2.35212100 | -1.17443400 |
| F | -2.96631900 | -0.08053000 | 1.39508500  |
| F | -3.68042200 | -1.80005100 | 3.33301200  |
| F | -1.85233000 | -3.55584700 | 4.33607100  |
| F | 0.68794200  | -3.56075700 | 3.35780500  |
| F | 1.41073700  | -1.88585100 | 1.44357400  |
| F | -0.29661600 | 2.19354700  | -1.84774100 |
| F | -0.60228900 | 4.83117600  | -1.51771400 |
| F | -1.23963400 | 5.83643000  | 0.93541700  |
| F | -1.54785200 | 4.14116900  | 3.04430000  |
| F | -1.22714900 | 1.53777900  | 2.74852400  |
| C | 8.24337300  | 0.60982600  | 0.45873000  |
| H | 8.47011400  | 0.27312300  | 1.47681900  |

|                                                                       |             |             |             |
|-----------------------------------------------------------------------|-------------|-------------|-------------|
| H                                                                     | 8.95295200  | 0.10768900  | -0.20813800 |
| H                                                                     | 8.39845800  | 1.68829900  | 0.39943200  |
| <b>1a•B(C<sub>6</sub>F<sub>5</sub>)<sub>3</sub> (R = F, R' = OMe)</b> |             |             |             |
| E(SMD/M06-2X/6-31G(d)) = -2804.671699 au                              |             |             |             |
| H(SMD/M06-2X/6-31G(d)) = -2804.330191 au                              |             |             |             |
| G(SMD/M06-2X/6-31G(d)) = -2804.446733 au                              |             |             |             |
| E(SMD/M06-2X/def2-TZVP//SMD/M06-2X /6-31G(d)) = -2805.880069 au       |             |             |             |
| C                                                                     | 2.41742500  | 0.74291700  | -1.44657900 |
| C                                                                     | 3.72018700  | 0.37091900  | -1.51143000 |
| C                                                                     | 4.55742400  | 0.49930100  | -0.35092300 |
| C                                                                     | 4.28020100  | -0.14021400 | -2.73204300 |
| C                                                                     | 5.87773100  | 0.13452200  | -0.40524100 |
| H                                                                     | 4.12699100  | 0.91137100  | 0.55612400  |
| C                                                                     | 5.59800100  | -0.51485100 | -2.78398300 |
| H                                                                     | 3.63691000  | -0.22902600 | -3.60113700 |
| C                                                                     | 6.36354500  | -0.37005600 | -1.61898000 |
| H                                                                     | 6.54768500  | 0.21969800  | 0.44245300  |
| H                                                                     | 6.06195300  | -0.91224700 | -3.67924500 |
| C                                                                     | 1.11576000  | 0.99876200  | -1.57998800 |
| O                                                                     | 0.25667900  | 0.02340400  | -1.43867600 |
| O                                                                     | 0.62633000  | 2.21385900  | -1.81914700 |
| C                                                                     | 1.58893300  | 3.27105200  | -1.85419500 |
| H                                                                     | 2.12416900  | 3.31830200  | -0.90002100 |
| H                                                                     | 2.29414100  | 3.11994900  | -2.67830000 |
| H                                                                     | 1.02460600  | 4.18800300  | -2.01487500 |
| B                                                                     | -0.60775500 | -0.11687300 | -0.18544500 |
| C                                                                     | -1.53373800 | 1.21766800  | 0.04893100  |
| C                                                                     | -2.21853300 | 1.75603500  | -1.03802200 |
| C                                                                     | -1.81486600 | 1.81773800  | 1.26963400  |
| C                                                                     | -3.08001900 | 2.83822500  | -0.94670300 |
| C                                                                     | -2.67487400 | 2.90162200  | 1.40830300  |
| C                                                                     | -3.30987600 | 3.41786700  | 0.29212900  |
| C                                                                     | 0.45623100  | -0.42374500 | 1.02677600  |
| C                                                                     | 0.75236500  | -1.68216400 | 1.53864500  |
| C                                                                     | 1.26360600  | 0.59895200  | 1.51814600  |
| C                                                                     | 1.75539500  | -1.91700400 | 2.47323000  |
| C                                                                     | 2.28043900  | 0.41094800  | 2.44029900  |
| C                                                                     | 2.53442400  | -0.86429200 | 2.92063600  |
| C                                                                     | -1.67191200 | -1.31938000 | -0.47333300 |
| C                                                                     | -2.47621700 | -1.74413700 | 0.58083900  |
| C                                                                     | -1.96692400 | -1.89426800 | -1.70282700 |
| C                                                                     | -3.48304200 | -2.68549900 | 0.45961100  |
| C                                                                     | -2.97189100 | -2.84446300 | -1.87002800 |
| C                                                                     | -3.73329600 | -3.24320600 | -0.78665400 |
| F                                                                     | -1.25572500 | 1.37297300  | 2.40646000  |
| F                                                                     | -2.89594600 | 3.44535600  | 2.60918000  |
| F                                                                     | -4.13781800 | 4.45682400  | 0.40648400  |
| F                                                                     | -3.69887400 | 3.31757800  | -2.03010900 |
| F                                                                     | -2.06587500 | 1.21521200  | -2.25641900 |
| F                                                                     | -2.27193700 | -1.22477500 | 1.80488400  |

|   |             |             |             |
|---|-------------|-------------|-------------|
| F | -4.21182000 | -3.05801100 | 1.51549300  |
| F | -4.69815100 | -4.15161200 | -0.93572400 |
| F | -3.20924300 | -3.37063000 | -3.07581200 |
| F | -1.29692600 | -1.56719600 | -2.81643500 |
| F | 1.07990300  | 1.86243200  | 1.09001400  |
| F | 3.05157800  | 1.43448700  | 2.82584000  |
| F | 3.51713600  | -1.07231700 | 3.79563000  |
| F | 1.98755400  | -3.15260200 | 2.92299900  |
| F | 0.07626600  | -2.77145200 | 1.14188500  |
| F | 7.62980900  | -0.72841000 | -1.67022300 |

**1a**•B(C<sub>6</sub>F<sub>5</sub>)<sub>3</sub> (R = H, R' = OMe)

E(SMD/M06-2X/6-31G(d)) = -2705.463847 au

H(SMD/M06-2X/6-31G(d)) = -2705.115172 au

G(SMD/M06-2X/6-31G(d)) = -2705.231343 au

E(SMD/M06-2X/def2-TZVP//SMD/M06-2X/6-31G(d)) = -2706.624664 au

|   |             |             |             |
|---|-------------|-------------|-------------|
| C | 2.56213700  | 0.70703800  | -1.49689600 |
| C | 3.82003000  | 0.24284100  | -1.74936500 |
| C | 4.80538100  | 0.28399500  | -0.71170700 |
| C | 4.16516500  | -0.28535000 | -3.03527500 |
| C | 6.07590600  | -0.18831900 | -0.95499700 |
| H | 4.52811700  | 0.70738200  | 0.24881400  |
| C | 5.43783200  | -0.76134400 | -3.25766800 |
| H | 3.40386800  | -0.30723500 | -3.80872700 |
| C | 6.38182700  | -0.71070000 | -2.22039300 |
| H | 6.83525800  | -0.16130500 | -0.18168800 |
| H | 5.71476600  | -1.17169900 | -4.22212900 |
| C | 1.25688100  | 0.97192000  | -1.64399400 |
| O | 0.40160700  | 0.00617300  | -1.45075400 |
| O | 0.77365900  | 2.18453700  | -1.88781700 |
| C | 1.75343400  | 3.22161000  | -2.00521300 |
| H | 2.32174300  | 3.29935300  | -1.07226500 |
| H | 2.42534300  | 3.01875000  | -2.84541700 |
| H | 1.20005500  | 4.14105300  | -2.18726200 |
| B | -0.42619600 | -0.10943200 | -0.16547800 |
| C | -1.34635800 | 1.22734800  | 0.06783100  |
| C | -2.06631300 | 1.74291100  | -1.00725300 |
| C | -1.59151600 | 1.84862200  | 1.28576500  |
| C | -2.93135700 | 2.82166000  | -0.90828600 |
| C | -2.45361400 | 2.92971400  | 1.43173000  |
| C | -3.12637600 | 3.42183000  | 0.32668300  |
| C | 0.68349300  | -0.38588700 | 1.01049700  |
| C | 1.01386800  | -1.63349700 | 1.52743500  |
| C | 1.50571600  | 0.65165400  | 1.44383300  |
| C | 2.06549200  | -1.84507700 | 2.41274500  |
| C | 2.57271500  | 0.48623400  | 2.31216900  |
| C | 2.85795400  | -0.77915400 | 2.80126200  |
| C | -1.49210700 | -1.32131000 | -0.39788000 |
| C | -2.25090200 | -1.74174200 | 0.69109700  |
| C | -1.83212000 | -1.90832400 | -1.60999800 |
| C | -3.25482300 | -2.69123000 | 0.61757500  |

|   |             |             |             |
|---|-------------|-------------|-------------|
| C | -2.83648300 | -2.86623700 | -1.72945400 |
| C | -3.55065000 | -3.26129300 | -0.61301300 |
| F | -0.99224300 | 1.42866500  | 2.41129600  |
| F | -2.64011000 | 3.49420800  | 2.62873800  |
| F | -3.95665900 | 4.45802700  | 0.44797300  |
| F | -3.58567800 | 3.27873900  | -1.98032000 |
| F | -1.94674700 | 1.18131000  | -2.22007200 |
| F | -2.00248800 | -1.20953900 | 1.90116800  |
| F | -3.93807500 | -3.06020200 | 1.70466300  |
| F | -4.51379000 | -4.17780600 | -0.71571200 |
| F | -3.11809800 | -3.40384400 | -2.92051200 |
| F | -1.20940900 | -1.58589300 | -2.75201900 |
| F | 1.28937900  | 1.90499600  | 1.00255400  |
| F | 3.35540800  | 1.51920900  | 2.64214800  |
| F | 3.88640000  | -0.96622000 | 3.62736500  |
| F | 2.32980700  | -3.07072300 | 2.87228400  |
| F | 0.32720700  | -2.73378100 | 1.18217800  |
| H | 7.38427900  | -1.08664000 | -2.40433400 |

**1a•B(C<sub>6</sub>F<sub>5</sub>)<sub>3</sub> (R = Cl, R' = OMe)**

E(SMD/M06-2X/6-31G(d)) = -3165.032635 au

H(SMD/M06-2X/6-31G(d)) = -3164.692364 au

G(SMD/M06-2X/6-31G(d)) = -3164.809592 au

E(SMD/M06-2X/def2-TZVP//SMD/M06-2X /6-31G(d)) = -3166.227046 au

|   |             |             |             |
|---|-------------|-------------|-------------|
| C | 2.16025500  | 1.14250600  | -2.14849300 |
| C | 3.47314800  | 0.83394200  | -1.82124700 |
| C | 3.93132600  | 0.69579600  | -0.47322300 |
| C | 4.40593900  | 0.63987200  | -2.88315000 |
| C | 5.24249500  | 0.38030000  | -0.20408500 |
| H | 3.23442600  | 0.85753100  | 0.34378400  |
| C | 5.71976400  | 0.31684800  | -2.62207400 |
| H | 4.05333200  | 0.74638300  | -3.90381200 |
| C | 6.11855200  | 0.19347500  | -1.28504600 |
| H | 5.60049100  | 0.27559700  | 0.81410100  |
| H | 6.43533600  | 0.16192400  | -3.42132900 |
| C | 1.04571100  | 1.27796800  | -1.30235500 |
| O | 0.34193800  | 0.23628800  | -1.10624800 |
| O | 0.62583400  | 2.44795000  | -0.89056300 |
| C | 1.52276400  | 3.55933000  | -1.07324400 |
| B | -0.74860900 | -0.13089800 | -0.07407000 |
| C | -1.55783400 | 1.17610400  | 0.47465400  |
| C | -2.14236600 | 2.03290900  | -0.45461800 |
| C | -1.83343100 | 1.47317300  | 1.80158600  |
| C | -2.91695700 | 3.12791600  | -0.11322100 |
| C | -2.61256600 | 2.55838700  | 2.19117200  |
| C | -3.15642300 | 3.39068500  | 1.22897700  |
| C | 0.12229800  | -0.92800700 | 1.06149700  |
| C | 0.07651800  | -2.27773200 | 1.38595800  |
| C | 1.12912400  | -0.21922100 | 1.70927700  |
| C | 0.95403200  | -2.87564700 | 2.28762200  |
| C | 2.04069700  | -0.77115200 | 2.59037000  |

|    |             |             |             |
|----|-------------|-------------|-------------|
| C  | 1.94550200  | -2.12256100 | 2.89058600  |
| C  | -1.85044500 | -1.04004100 | -0.85657300 |
| C  | -2.88450000 | -1.59464300 | -0.10756400 |
| C  | -1.95525800 | -1.22214000 | -2.22942400 |
| C  | -3.93539800 | -2.31253600 | -0.65075600 |
| C  | -2.99598800 | -1.93567000 | -2.81803500 |
| C  | -3.98962100 | -2.48425500 | -2.02720700 |
| F  | -1.35379800 | 0.71275900  | 2.79772200  |
| F  | -2.84073500 | 2.79999400  | 3.48481100  |
| F  | -3.90260900 | 4.43581300  | 1.58469200  |
| F  | -3.43839300 | 3.92412100  | -1.05029100 |
| F  | -1.94059500 | 1.81420400  | -1.76496900 |
| F  | -2.87338900 | -1.44182900 | 1.22832900  |
| F  | -4.89122600 | -2.83149000 | 0.12412600  |
| F  | -4.99126700 | -3.16815300 | -2.57993500 |
| F  | -3.04596800 | -2.08600200 | -4.14483300 |
| F  | -1.05515100 | -0.70820300 | -3.07965100 |
| F  | 1.27515700  | 1.09867300  | 1.44894200  |
| F  | 3.00915100  | -0.02565000 | 3.12946600  |
| F  | 2.80377900  | -2.68706700 | 3.73772800  |
| F  | 0.85724100  | -4.17922400 | 2.55677400  |
| F  | -0.81407200 | -3.10761600 | 0.82392700  |
| H  | 1.80569400  | 3.63940700  | -2.12774600 |
| H  | 0.96239200  | 4.44006200  | -0.76649700 |
| H  | 2.40648400  | 3.43184200  | -0.44400000 |
| Cl | 7.76326900  | -0.20110400 | -0.94879400 |

**1a•B(C<sub>6</sub>F<sub>5</sub>)<sub>3</sub>** (R = CF<sub>3</sub>, R' = OMe)

E(SMD/M06-2X/6-31G(d)) = -3042.393013 au

H(SMD/M06-2X/6-31G(d)) = -3042.035556 au

G(SMD/M06-2X/6-31G(d)) = -3042.157924 au

E(SMD/M06-2X/def2-TZVP//SMD/M06-2X/6-31G(d)) = -3043.707829 au

|   |             |             |             |
|---|-------------|-------------|-------------|
| C | -1.94186600 | 0.91951900  | 0.92934500  |
| C | -3.26351200 | 0.54498700  | 0.95682200  |
| C | -4.07364900 | 0.80863600  | -0.18524900 |
| C | -3.83264400 | -0.08344800 | 2.10577600  |
| C | -5.40967500 | 0.45686100  | -0.17903000 |
| H | -3.62176000 | 1.29895100  | -1.04198700 |
| C | -5.16498200 | -0.43297500 | 2.10079400  |
| H | -3.19975100 | -0.27918400 | 2.96517300  |
| C | -5.93359300 | -0.15671300 | 0.96096800  |
| H | -6.04200800 | 0.65185700  | -1.03714100 |
| H | -5.61927300 | -0.91338600 | 2.96130800  |
| C | -0.67917400 | 0.96926700  | 1.39840000  |
| O | 0.07425200  | -0.07056000 | 1.19742400  |
| O | -0.13088600 | 2.04735800  | 1.93156400  |
| C | -1.00233100 | 3.17875100  | 2.06355600  |
| B | 1.14365300  | -0.11767800 | 0.08757500  |
| C | 2.22770000  | 1.09585200  | 0.26934000  |
| C | 2.75797500  | 1.34165700  | 1.53347200  |
| C | 2.78473400  | 1.85040000  | -0.75532300 |

|   |             |             |             |
|---|-------------|-------------|-------------|
| C | 3.73411700  | 2.29269800  | 1.78686000  |
| C | 3.76824000  | 2.81076800  | -0.54745300 |
| C | 4.24477800  | 3.03544700  | 0.73275700  |
| C | 0.27385900  | -0.05955900 | -1.30000600 |
| C | -0.08251700 | -1.15979800 | -2.07178100 |
| C | -0.32776000 | 1.13537300  | -1.68873200 |
| C | -0.95909000 | -1.09018900 | -3.14923800 |
| C | -1.22132400 | 1.24895100  | -2.74155800 |
| C | -1.53975000 | 0.12132100  | -3.48242600 |
| C | 1.99095800  | -1.49076900 | 0.30978500  |
| C | 2.91582700  | -1.84838200 | -0.66747400 |
| C | 1.99145000  | -2.29671100 | 1.44081800  |
| C | 3.76874700  | -2.93340400 | -0.56858300 |
| C | 2.83335400  | -3.39747700 | 1.58220100  |
| C | 3.72531300  | -3.71884200 | 0.57520500  |
| F | 2.39005700  | 1.68798700  | -2.02786000 |
| F | 4.25925000  | 3.51447100  | -1.57169500 |
| F | 5.18727500  | 3.95280100  | 0.95019000  |
| F | 4.19417300  | 2.49190900  | 3.02557200  |
| F | 2.32607400  | 0.63069700  | 2.58651700  |
| F | 2.99439200  | -1.11016900 | -1.78894200 |
| F | 4.62689900  | -3.22924500 | -1.54832800 |
| F | 4.53602000  | -4.76977300 | 0.70027800  |
| F | 2.78781400  | -4.14387800 | 2.68996600  |
| F | 1.17352000  | -2.06241300 | 2.47632600  |
| F | -0.06448200 | 2.26677800  | -1.00887800 |
| F | -1.80624900 | 2.41759900  | -3.02260200 |
| F | -2.40182900 | 0.20222300  | -4.49476000 |
| F | -1.26106700 | -2.18578600 | -3.85004000 |
| F | 0.39913500  | -2.38304500 | -1.80357200 |
| C | -7.39876600 | -0.53070700 | 1.00959900  |
| F | -7.55054000 | -1.81104400 | 1.36502100  |
| F | -8.00596900 | -0.35569900 | -0.16524400 |
| F | -8.03937800 | 0.21515900  | 1.91797300  |
| H | -1.83336500 | 2.94144200  | 2.73480500  |
| H | -0.39712800 | 3.97686000  | 2.48890800  |
| H | -1.37627900 | 3.47124900  | 1.07677600  |

**1a•B(C<sub>6</sub>F<sub>5</sub>)<sub>3</sub> (R = CN, R' = OMe)**

E(SMD/M06-2X/6-31G(d)) = -2797.672702 au

H(SMD/M06-2X/6-31G(d)) = -2797.323941 au

G(SMD/M06-2X/6-31G(d)) = -2797.443607 au

E(SMD/M06-2X/def2-TZVP//SMD/M06-2X /6-31G(d)) = -2798.866284 au

|   |             |            |             |
|---|-------------|------------|-------------|
| C | -2.31911100 | 2.42583700 | 0.04661000  |
| C | -3.63902900 | 1.98984200 | -0.10446700 |
| C | -4.56179700 | 2.88301200 | -0.71644000 |
| C | -4.08430900 | 0.70059700 | 0.31139300  |
| C | -5.87696800 | 2.50940500 | -0.91222600 |
| H | -4.20617800 | 3.85941300 | -1.02778800 |
| C | -5.39661700 | 0.32346200 | 0.11873700  |
| H | -3.38135600 | 0.01542900 | 0.77404900  |

|   |             |             |             |
|---|-------------|-------------|-------------|
| C | -6.27777800 | 1.23237600  | -0.49208100 |
| H | -6.59147300 | 3.17709500  | -1.37965700 |
| H | -5.75357900 | -0.65287600 | 0.42598400  |
| C | -1.22550900 | 1.68283400  | 0.54657900  |
| O | -0.57543100 | 0.98368500  | -0.28717600 |
| O | -0.77648200 | 1.84986400  | 1.76185600  |
| C | -1.62474100 | 2.57954600  | 2.67154300  |
| H | -1.89360300 | 3.54535300  | 2.23154000  |
| H | -2.51667000 | 1.99120200  | 2.89630400  |
| H | -1.03036600 | 2.72741900  | 3.57044800  |
| B | 0.69318700  | 0.10622300  | -0.15177700 |
| C | 0.92052400  | -0.45025600 | 1.36960900  |
| C | -0.15686900 | -0.97157200 | 2.07861400  |
| C | 2.15192500  | -0.60293900 | 1.99503100  |
| C | -0.05824500 | -1.55666000 | 3.32942200  |
| C | 2.30290100  | -1.19204400 | 3.24607800  |
| C | 1.19213900  | -1.67015900 | 3.91961000  |
| C | 1.88266100  | 1.06285500  | -0.72866000 |
| C | 2.37792200  | 1.02909800  | -2.02725000 |
| C | 2.40456700  | 2.08277600  | 0.06348500  |
| C | 3.33742200  | 1.91488000  | -2.50475600 |
| C | 3.36066700  | 2.98756400  | -0.36972700 |
| C | 3.83215700  | 2.90226200  | -1.67088900 |
| C | 0.37821300  | -1.23158300 | -1.03381600 |
| C | 1.42899800  | -2.10046500 | -1.31474900 |
| C | -0.87621900 | -1.68533100 | -1.42342300 |
| C | 1.28025300  | -3.31303800 | -1.96481300 |
| C | -1.07154200 | -2.89887700 | -2.07756600 |
| C | 0.00973000  | -3.71687800 | -2.35131000 |
| F | 3.28289500  | -0.18035200 | 1.41266400  |
| F | 3.51221700  | -1.30349500 | 3.79980100  |
| F | 1.32037700  | -2.23408900 | 5.11957400  |
| F | -1.14032600 | -2.01885900 | 3.96045900  |
| F | -1.39296400 | -0.91242500 | 1.53870000  |
| F | 2.67419500  | -1.75502500 | -0.94482300 |
| F | 2.33284600  | -4.09486100 | -2.21548700 |
| F | -0.16487300 | -4.88135600 | -2.97526900 |
| F | -2.30065700 | -3.28206900 | -2.43484500 |
| F | -1.99469200 | -0.97849000 | -1.18674300 |
| F | 1.98795400  | 2.22167200  | 1.33210400  |
| F | 3.82600000  | 3.93667600  | 0.44635200  |
| F | 4.74842600  | 3.76201500  | -2.11238400 |
| F | 3.77591600  | 1.82579400  | -3.76285300 |
| F | 1.94414200  | 0.11963300  | -2.91334000 |
| C | -7.64850300 | 0.83428300  | -0.69322500 |
| N | -8.74822300 | 0.51565500  | -0.85321300 |

**1a•B(C<sub>6</sub>F<sub>5</sub>)<sub>3</sub>** (R = NO<sub>2</sub>, R' = OMe)

E(SMD/M06-2X/6-31G(d)) = -2909.88039 au

H(SMD/M06-2X/6-31G(d)) = -2909.526593 au

G(SMD/M06-2X/6-31G(d)) = -2909.648496 au

E(SMD/M06-2X/def2-TZVP//SMD/M06-2X /6-31G(d)) = -2911.128631 au

|   |             |             |             |
|---|-------------|-------------|-------------|
| C | -2.15159600 | 2.32812200  | 0.27765200  |
| C | -3.46461000 | 1.86630300  | 0.11630800  |
| C | -4.41319400 | 2.77679000  | -0.42304000 |
| C | -3.87521600 | 0.54538900  | 0.45703000  |
| C | -5.72653400 | 2.38960500  | -0.62253700 |
| H | -4.08384500 | 3.77837700  | -0.67736700 |
| C | -5.18528500 | 0.15246800  | 0.26296200  |
| H | -3.15319700 | -0.15329800 | 0.86591900  |
| C | -6.06772100 | 1.08839800  | -0.27197400 |
| H | -6.46834200 | 3.06147500  | -1.03528200 |
| H | -5.52681800 | -0.84460400 | 0.51075200  |
| C | -1.01689700 | 1.60270000  | 0.70579800  |
| O | -0.34020900 | 1.02064600  | -0.19363000 |
| O | -0.56330300 | 1.69067100  | 1.92739700  |
| C | -1.45348000 | 2.26148200  | 2.90808000  |
| H | -1.81855900 | 3.23235900  | 2.55691900  |
| H | -2.28289900 | 1.57613700  | 3.09453500  |
| H | -0.85544900 | 2.38909900  | 3.80761800  |
| B | 0.92757400  | 0.12832500  | -0.15391500 |
| C | 1.20893400  | -0.49887600 | 1.33031100  |
| C | 0.16237600  | -1.09121800 | 2.02970000  |
| C | 2.45463600  | -0.63532500 | 1.92962600  |
| C | 0.30082800  | -1.72941300 | 3.24998500  |
| C | 2.64627600  | -1.27660000 | 3.14923400  |
| C | 1.56446200  | -1.82637300 | 3.81485900  |
| C | 2.09588500  | 1.11239600  | -0.72521500 |
| C | 2.60742400  | 1.10665800  | -2.01727700 |
| C | 2.58659900  | 2.13079000  | 0.08824400  |
| C | 3.55448800  | 2.02006100  | -2.46844000 |
| C | 3.52847600  | 3.06182800  | -0.31751300 |
| C | 4.01814700  | 3.00454100  | -1.61397000 |
| C | 0.57952000  | -1.16306900 | -1.08967700 |
| C | 1.61523100  | -2.03550900 | -1.41274800 |
| C | -0.68345200 | -1.57939600 | -1.49130000 |
| C | 1.44396200  | -3.21685400 | -2.11252500 |
| C | -0.90192000 | -2.76074700 | -2.19497100 |
| C | 0.16490400  | -3.58328000 | -2.50873700 |
| F | 3.56004100  | -0.14418100 | 1.35234500  |
| F | 3.86742800  | -1.37056200 | 3.67945900  |
| F | 1.73273600  | -2.44218300 | 4.98382300  |
| F | -0.75412200 | -2.25769100 | 3.87487300  |
| F | -1.08446400 | -1.04430600 | 1.51285800  |
| F | 2.86720100  | -1.72335500 | -1.03594600 |
| F | 2.48210600  | -4.00432300 | -2.40229100 |
| F | -0.03154100 | -4.71679600 | -3.18107800 |
| F | -2.13862200 | -3.10896800 | -2.56140500 |
| F | -1.78858800 | -0.86456500 | -1.21708700 |
| F | 2.14770300  | 2.23595800  | 1.35286500  |
| F | 3.96397500  | 4.00802100  | 0.51801400  |



|   |             |             |             |
|---|-------------|-------------|-------------|
| F | 4.92202200  | 3.88913600  | -2.03118200 |
| F | 4.01042100  | 1.95931900  | -3.72199300 |
| F | 2.20447300  | 0.20293800  | -2.92334500 |
| N | -7.47575700 | 0.66519000  | -0.48126500 |
| O | -7.76528100 | -0.47764400 | -0.18898800 |
| O | -8.24606000 | 1.49023500  | -0.93016000 |

**1** (R = H, R' = Me)

E(SMD/M06-2X/6-31G(d)) = -532.2397061 au

H(SMD/M06-2X/6-31G(d)) = -532.074358 au

G(SMD/M06-2X/6-31G(d)) = -532.120356 au

E(SMD/M06-2X/def2-TZVP//SMD/M06-2X /6-31G(d)) = -532.4463632 au

|   |             |             |             |
|---|-------------|-------------|-------------|
| C | 0.90079600  | 0.17831600  | 0.00002000  |
| N | 1.38562200  | 1.40354500  | 0.00016600  |
| N | 1.79736600  | 2.45234100  | 0.00046700  |
| C | -0.57057000 | 0.05028900  | -0.00004200 |
| C | -1.18809800 | -1.20958900 | 0.00009000  |
| C | -1.38191100 | 1.19684400  | -0.00023900 |
| C | -2.57726900 | -1.30703000 | 0.00003300  |
| H | -0.57896100 | -2.10299800 | 0.00023500  |
| C | -2.76711100 | 1.08694000  | -0.00028800 |
| H | -0.93550400 | 2.18786500  | -0.00036600 |
| C | -3.37584500 | -0.16672800 | -0.00015000 |
| H | -3.03540000 | -2.29183400 | 0.00014000  |
| H | -3.37135600 | 1.98921600  | -0.00043800 |
| H | -4.45800400 | -0.25183600 | -0.00018800 |
| C | 1.92144600  | -0.88040600 | -0.00001700 |
| O | 1.61119000  | -2.06100200 | -0.00010100 |
| C | 3.37265400  | -0.44805500 | 0.00005700  |
| H | 3.60469900  | 0.15309400  | -0.88597100 |
| H | 3.60462900  | 0.15303400  | 0.88614300  |
| H | 3.99491700  | -1.34320900 | 0.00005100  |

**1** (R = H, R' = H)

E(SMD/M06-2X/6-31G(d)) = -492.9353776 au

H(SMD/M06-2X/6-31G(d)) = -492.798718 au

G(SMD/M06-2X/6-31G(d)) = -492.844035 au

E(SMD/M06-2X/def2-TZVP//SMD/M06-2X /6-31G(d)) = -493.1284201 au

|   |             |             |             |
|---|-------------|-------------|-------------|
| C | -1.26187600 | -0.03392400 | -0.00007800 |
| N | -1.88151600 | -1.20126700 | -0.00009700 |
| N | -2.41460700 | -2.19166100 | -0.00000200 |
| C | 0.21169200  | -0.03737900 | 0.00000000  |
| C | 0.91984000  | 1.17309500  | 0.00010300  |
| C | 0.92768000  | -1.24403500 | -0.00003100 |
| C | 2.31200000  | 1.16473100  | 0.00016700  |
| H | 0.37752300  | 2.10963700  | 0.00012900  |
| C | 2.31744900  | -1.23933900 | 0.00003700  |
| H | 0.40288000  | -2.19591400 | -0.00011100 |
| C | 3.01899300  | -0.03493600 | 0.00013500  |
| H | 2.84553400  | 2.11065100  | 0.00024500  |
| H | 2.85267100  | -2.18406400 | 0.00001000  |
| H | 4.10452200  | -0.03316800 | 0.00018600  |

|   |             |            |             |
|---|-------------|------------|-------------|
| C | -2.18339800 | 1.09139900 | -0.00012900 |
| O | -1.85435500 | 2.26359700 | -0.00010300 |
| H | -3.24972400 | 0.79690800 | -0.00016600 |

**1** (R = H, R' = Ph)

E(SMD/M06-2X/6-31G(d)) = -723.9061158 au

H(SMD/M06-2X/6-31G(d)) = -723.682848 au

G(SMD/M06-2X/6-31G(d)) = -723.738866 au

E(SMD/M06-2X/def2-TZVP//SMD/M06-2X /6-31G(d)) = -724.1798414 au

|   |             |             |             |
|---|-------------|-------------|-------------|
| C | -0.51631300 | 0.26596400  | 0.08372700  |
| N | -0.10206100 | 1.50333100  | 0.26735400  |
| N | 0.21656400  | 2.57048300  | 0.43739100  |
| C | -1.97880000 | 0.06440100  | 0.01203700  |
| C | -2.50734700 | -1.12677100 | -0.50608300 |
| C | -2.86175000 | 1.06800400  | 0.43627500  |
| C | -3.88543900 | -1.30143900 | -0.58876800 |
| H | -1.84061000 | -1.91263000 | -0.83693300 |
| C | -4.23727400 | 0.88636900  | 0.34385500  |
| H | -2.47839300 | 1.99820300  | 0.84776000  |
| C | -4.75789800 | -0.30063400 | -0.16691200 |
| H | -4.27729300 | -2.23039800 | -0.99231400 |
| H | -4.90224400 | 1.67659300  | 0.67911900  |
| H | -5.83176200 | -0.44386700 | -0.23530900 |
| C | 0.50858200  | -0.78571300 | 0.11673100  |
| O | 0.19437700  | -1.95850400 | 0.25969700  |
| C | 1.95307000  | -0.40058000 | -0.00351600 |
| C | 2.87758300  | -1.10523200 | 0.77339900  |
| C | 2.39895400  | 0.57277500  | -0.90264500 |
| C | 4.23376900  | -0.81501000 | 0.67791500  |
| H | 2.51984900  | -1.87421200 | 1.45134600  |
| C | 3.75963300  | 0.84954400  | -1.00792400 |
| H | 1.69351900  | 1.09419900  | -1.54467800 |
| C | 4.67550800  | 0.16390400  | -0.21240600 |
| H | 4.94755600  | -1.35406600 | 1.29310900  |
| H | 4.10391000  | 1.59709300  | -1.71567500 |
| H | 5.73527100  | 0.38691900  | -0.29133100 |

**1** (R = H, R' = OH)

E(SMD/M06-2X/6-31G(d)) = -568.1599856 au

H(SMD/M06-2X/6-31G(d)) = -568.018327 au

G(SMD/M06-2X/6-31G(d)) = -568.063266 au

E(SMD/M06-2X/def2-TZVP//SMD/M06-2X /6-31G(d)) = -568.3909031 au

|   |             |             |             |
|---|-------------|-------------|-------------|
| C | 0.92062800  | 0.19961100  | 0.00007900  |
| N | 1.42229300  | 1.41816300  | 0.00024900  |
| N | 1.83360400  | 2.46514700  | 0.00016200  |
| C | -0.54674900 | 0.06059300  | 0.00004800  |
| C | -1.15311600 | -1.20412500 | 0.00021500  |
| C | -1.36439000 | 1.20177400  | -0.00012500 |
| C | -2.54109900 | -1.31241100 | 0.00021800  |
| H | -0.53907600 | -2.09495900 | 0.00034700  |
| C | -2.74883200 | 1.08044800  | -0.00011200 |
| H | -0.92426200 | 2.19561000  | -0.00028400 |

|   |             |             |             |
|---|-------------|-------------|-------------|
| C | -3.34790600 | -0.17775100 | 0.00005900  |
| H | -2.99150300 | -2.30069300 | 0.00035300  |
| H | -3.36007900 | 1.97791800  | -0.00024400 |
| H | -4.42931000 | -0.27119700 | 0.00006600  |
| C | 1.91982000  | -0.86522800 | -0.00013500 |
| O | 1.67918700  | -2.05343200 | -0.00041300 |
| O | 3.17605600  | -0.37700400 | -0.00011800 |
| H | 3.78087500  | -1.14382700 | -0.00034200 |

**1** (R = H, R' = F)

E(SMD/M06-2X/6-31G(d)) = -592.1641238 au

H(SMD/M06-2X/6-31G(d)) = -592.035254 au

G(SMD/M06-2X/6-31G(d)) = -592.079864 au

E(SMD/M06-2X/def2-TZVP//SMD/M06-2X /6-31G(d)) = -592.40431 au

|   |             |             |             |
|---|-------------|-------------|-------------|
| C | 0.92605800  | 0.17541100  | 0.00002100  |
| N | 1.45886900  | 1.38630600  | 0.00011300  |
| N | 1.88300700  | 2.42502200  | -0.00000100 |
| C | -0.54438500 | 0.05955200  | 0.00004800  |
| C | -1.16268200 | -1.19832300 | 0.00016200  |
| C | -1.34445500 | 1.21161100  | -0.00002700 |
| C | -2.55171900 | -1.29006600 | 0.00020800  |
| H | -0.56204800 | -2.09875800 | 0.00021700  |
| C | -2.73036600 | 1.10637500  | 0.00002500  |
| H | -0.89150400 | 2.19952300  | -0.00013600 |
| C | -3.34343700 | -0.14489300 | 0.00014300  |
| H | -3.01422300 | -2.27252600 | 0.00029900  |
| H | -3.33131600 | 2.01058400  | -0.00003300 |
| H | -4.42582700 | -0.22528500 | 0.00018200  |
| C | 1.88955700  | -0.89913200 | -0.00015300 |
| O | 1.69762200  | -2.07807500 | -0.00026300 |
| F | 3.15770800  | -0.42127100 | -0.00019800 |

**1'** (R = H, R' = Me)

E(SMD/M06-2X/6-31G(d)) = -532.1808618 au

H(SMD/M06-2X/6-31G(d)) = -532.018101 au

G(SMD/M06-2X/6-31G(d)) = -532.068893 au

E(SMD/M06-2X/def2-TZVP//SMD/M06-2X /6-31G(d)) = -532.3905711 au

|   |             |             |             |
|---|-------------|-------------|-------------|
| C | -0.87896400 | 0.08766100  | -0.64680300 |
| N | -1.45190900 | 1.66778300  | 0.39935200  |
| N | -1.59805100 | 2.75626800  | 0.48492500  |
| C | 0.52521000  | -0.02511200 | -0.28272800 |
| C | 1.43334900  | 0.91445200  | -0.80427100 |
| C | 1.01319200  | -1.05788100 | 0.54172000  |
| C | 2.78609600  | 0.83843100  | -0.49918600 |
| H | 1.05223500  | 1.70336200  | -1.44705500 |
| C | 2.37042100  | -1.15379100 | 0.81719400  |
| H | 0.32105100  | -1.79585700 | 0.93521000  |
| C | 3.25405500  | -0.20084600 | 0.30604200  |
| H | 3.47808300  | 1.57353400  | -0.89762000 |
| H | 2.74281200  | -1.96060100 | 1.44071800  |
| H | 4.31363700  | -0.27175900 | 0.53379500  |
| C | -1.85880800 | -0.90662300 | -0.29252900 |

|                                                                 |             |             |             |
|-----------------------------------------------------------------|-------------|-------------|-------------|
| O                                                               | -1.64415400 | -2.03598600 | -0.74151200 |
| C                                                               | -3.14638100 | -0.57089900 | 0.42224900  |
| H                                                               | -2.95434800 | -0.37452600 | 1.48237400  |
| H                                                               | -3.61952000 | 0.31774900  | -0.00608600 |
| H                                                               | -3.82002700 | -1.42471800 | 0.33069500  |
| <b>I' (R = H, R' = H)</b>                                       |             |             |             |
| E(SMD/M06-2X/6-31G(d)) = -492.8765676 au                        |             |             |             |
| H(SMD/M06-2X/6-31G(d)) = -492.743532 au                         |             |             |             |
| G(SMD/M06-2X/6-31G(d)) = -492.791082 au                         |             |             |             |
| E(SMD/M06-2X/def2-TZVP//SMD/M06-2X /6-31G(d)) = -493.0726905 au |             |             |             |
| C                                                               | -1.20430200 | 0.11408200  | 0.55026900  |
| N                                                               | -1.98823300 | -1.38430900 | -0.50685800 |
| N                                                               | -2.27145200 | -2.44235900 | -0.61862000 |
| C                                                               | 0.20847100  | 0.05469900  | 0.25090900  |
| C                                                               | 0.99600900  | -0.93882100 | 0.86392200  |
| C                                                               | 0.82806900  | 0.99143200  | -0.60191100 |
| C                                                               | 2.36043000  | -1.00795800 | 0.61897200  |
| H                                                               | 0.51189300  | -1.65036900 | 1.52690600  |
| C                                                               | 2.19807800  | 0.94274300  | -0.81620500 |
| H                                                               | 0.22517600  | 1.76665600  | -1.06500600 |
| C                                                               | 2.95964500  | -0.06233200 | -0.21533200 |
| H                                                               | 2.96133400  | -1.78234200 | 1.08467100  |
| H                                                               | 2.67527800  | 1.67442100  | -1.46036600 |
| H                                                               | 4.02963400  | -0.10615300 | -0.39648400 |
| C                                                               | -2.09143100 | 1.15452100  | 0.13589100  |
| O                                                               | -1.88564400 | 2.31733800  | 0.47955300  |
| H                                                               | -3.03018400 | 0.85557400  | -0.36688900 |
| <b>I' (R = H, R' = Ph)</b>                                      |             |             |             |
| E(SMD/M06-2X/6-31G(d)) = -723.8481604 au                        |             |             |             |
| H(SMD/M06-2X/6-31G(d)) = -723.628412 au                         |             |             |             |
| G(SMD/M06-2X/6-31G(d)) = -723.686858 au                         |             |             |             |
| E(SMD/M06-2X/def2-TZVP//SMD/M06-2X /6-31G(d)) = -724.124156 au  |             |             |             |
| C                                                               | -0.56177300 | 0.29279500  | 0.75936700  |
| N                                                               | -0.01053300 | 1.65033000  | -0.58824300 |
| N                                                               | -0.01345200 | 2.66137000  | -1.02376300 |
| C                                                               | -1.92091800 | 0.03737400  | 0.30756500  |
| C                                                               | -2.94066300 | 0.89734100  | 0.75234300  |
| C                                                               | -2.25557100 | -1.04073200 | -0.53634400 |
| C                                                               | -4.25959000 | 0.69204000  | 0.36610100  |
| H                                                               | -2.67395600 | 1.72400700  | 1.40460400  |
| C                                                               | -3.57486600 | -1.25515800 | -0.90781600 |
| H                                                               | -1.47361100 | -1.71276200 | -0.87552800 |
| C                                                               | -4.57403400 | -0.38625700 | -0.46076400 |
| H                                                               | -5.04124300 | 1.36113000  | 0.71121200  |
| H                                                               | -3.83066600 | -2.09107000 | -1.55127900 |
| H                                                               | -5.60488300 | -0.55379500 | -0.75909300 |
| C                                                               | 0.47862300  | -0.70085500 | 0.66356400  |
| O                                                               | 0.20002700  | -1.83029500 | 1.08179700  |
| C                                                               | 1.89163600  | -0.37031600 | 0.29142200  |
| C                                                               | 2.64111100  | -1.36903400 | -0.33576600 |

|   |            |             |             |
|---|------------|-------------|-------------|
| C | 2.49311300 | 0.85186800  | 0.60729600  |
| C | 3.96926100 | -1.13664600 | -0.67831600 |
| H | 2.17024800 | -2.32314900 | -0.55357400 |
| C | 3.82670900 | 1.07703900  | 0.27703400  |
| H | 1.92748200 | 1.61340100  | 1.13676400  |
| C | 4.56298700 | 0.08777700  | -0.37338200 |
| H | 4.54305700 | -1.91129400 | -1.17783000 |
| H | 4.29349200 | 2.02279700  | 0.53479100  |
| H | 5.60160700 | 0.26777100  | -0.63424600 |

I' (R = H, R' = OH)

E(SMD/M06-2X/6-31G(d)) = -568.1015258 au

H(SMD/M06-2X/6-31G(d)) = -567.962251 au

G(SMD/M06-2X/6-31G(d)) = -568.011706 au

E(SMD/M06-2X/def2-TZVP//SMD/M06-2X /6-31G(d)) = -568.3351721 au

|   |             |             |             |
|---|-------------|-------------|-------------|
| C | 0.88362000  | 0.12251600  | 0.66786800  |
| N | 1.51809500  | 1.64681300  | -0.43101700 |
| N | 1.79853500  | 2.70596800  | -0.53813200 |
| C | -0.51408200 | 0.00126700  | 0.28775800  |
| C | -1.43188100 | 0.90321500  | 0.85783700  |
| C | -0.99168000 | -0.99160600 | -0.59116900 |
| C | -2.78431000 | 0.82669200  | 0.55210600  |
| H | -1.05722200 | 1.66007800  | 1.54113000  |
| C | -2.34702100 | -1.08628800 | -0.87329200 |
| H | -0.29302900 | -1.69919000 | -1.02818700 |
| C | -3.24011800 | -0.17242800 | -0.30881400 |
| H | -3.48485200 | 1.53026200  | 0.99027200  |
| H | -2.71164300 | -1.86116800 | -1.54014100 |
| H | -4.29907700 | -0.24310000 | -0.53961300 |
| C | 1.82555800  | -0.91187200 | 0.28556700  |
| O | 1.67670800  | -2.04027200 | 0.72806700  |
| O | 2.91470900  | -0.54438000 | -0.41071700 |
| H | 3.49754900  | -1.32810300 | -0.44538800 |

I' (R = H, R' = F)

E(SMD/M06-2X/6-31G(d)) = -592.1071253 au

H(SMD/M06-2X/6-31G(d)) = -591.980704 au

G(SMD/M06-2X/6-31G(d)) = -592.029956 au

E(SMD/M06-2X/def2-TZVP//SMD/M06-2X /6-31G(d)) = -592.3492209 au

|   |             |             |             |
|---|-------------|-------------|-------------|
| C | 0.87856800  | 0.08530200  | 0.64785600  |
| N | 1.55019700  | 1.60105000  | -0.45089700 |
| N | 1.79441600  | 2.66677800  | -0.57581400 |
| C | -0.51585000 | -0.00653300 | 0.28177100  |
| C | -1.42278300 | 0.87006700  | 0.90916700  |
| C | -1.00434300 | -0.95319200 | -0.64324300 |
| C | -2.77818300 | 0.80922000  | 0.61760600  |
| H | -1.03672900 | 1.59110400  | 1.62380200  |
| C | -2.36200500 | -1.02908200 | -0.91423800 |
| H | -0.31084500 | -1.63648100 | -1.12508200 |
| C | -3.24455100 | -0.14341200 | -0.28987100 |
| H | -3.47309200 | 1.48935000  | 1.09911100  |
| H | -2.73784300 | -1.76616400 | -1.61640900 |

|   |             |             |             |
|---|-------------|-------------|-------------|
| H | -4.30624800 | -0.19949600 | -0.51180500 |
| C | 1.81416500  | -0.94582600 | 0.28764400  |
| O | 1.71078600  | -2.09077200 | 0.63883100  |
| F | 2.95289600  | -0.52735500 | -0.30815900 |

**1a** (R = H, R' = Me)

E(SMD/M06-2X/6-31G(d)) = -422.7074864 au

H(SMD/M06-2X/6-31G(d)) = -422.554914 au

G(SMD/M06-2X/6-31G(d)) = -422.600805 au

E(SMD/M06-2X/def2-TZVP//SMD/M06-2X /6-31G(d)) = -422.8741275 au

|   |             |             |             |
|---|-------------|-------------|-------------|
| C | 1.05566800  | -0.94720300 | -0.19595800 |
| C | -0.25959700 | -0.42097300 | -0.08817500 |
| C | -1.34724100 | -1.32882000 | -0.06471500 |
| C | -0.53288900 | 0.97109100  | -0.01572000 |
| C | -2.65115400 | -0.86981300 | 0.02965900  |
| H | -1.12698800 | -2.39033700 | -0.12356800 |
| C | -1.83542800 | 1.42796900  | 0.07266100  |
| H | 0.29623400  | 1.67352300  | -0.04186800 |
| C | -2.88824100 | 0.50547200  | 0.09725700  |
| H | -3.48261500 | -1.56640800 | 0.04838700  |
| H | -2.04506600 | 2.49124300  | 0.12443100  |
| H | -3.91003900 | 0.86728500  | 0.16899800  |
| C | 2.20506600  | -0.10359800 | -0.19335100 |
| O | 2.71239100  | 0.38290600  | -1.20439200 |
| C | 2.84211800  | 0.03529700  | 1.18011900  |
| H | 2.23460400  | -0.40866400 | 1.97435400  |
| H | 3.82362900  | -0.44848400 | 1.17239800  |
| H | 2.98130200  | 1.10206100  | 1.38133900  |

**1a** (R = H, R' = H)

E(SMD/M06-2X/6-31G(d)) = -383.4010252 au

H(SMD/M06-2X/6-31G(d)) = -383.278613 au

G(SMD/M06-2X/6-31G(d)) = -383.32025 au

E(SMD/M06-2X/def2-TZVP//SMD/M06-2X /6-31G(d)) = -383.5535515 au

|   |             |             |             |
|---|-------------|-------------|-------------|
| C | 1.41409900  | -0.88918300 | 0.10696200  |
| C | 0.08968400  | -0.39393400 | 0.07274100  |
| C | -0.97496200 | -1.32426700 | -0.04083700 |
| C | -0.21723300 | 0.99373200  | 0.11464100  |
| C | -2.28823700 | -0.89041900 | -0.10892100 |
| H | -0.72861700 | -2.38103000 | -0.07513600 |
| C | -1.52908300 | 1.42399400  | 0.04214400  |
| H | 0.59650000  | 1.70936400  | 0.19573300  |
| C | -2.55798700 | 0.48028300  | -0.06684800 |
| H | -3.10205700 | -1.60230700 | -0.19603700 |
| H | -1.76515800 | 2.48248900  | 0.07113700  |
| H | -3.58773300 | 0.82207600  | -0.12059700 |
| C | 2.56628400  | -0.09904300 | 0.31335300  |
| O | 3.34836100  | 0.40822400  | -0.48608200 |
| H | 2.78479000  | -0.10336800 | 1.41414700  |

**1a** (R = H, R' = Ph)

E(SMD/M06-2X/6-31G(d)) = -614.3788097 au

H(SMD/M06-2X/6-31G(d)) = -614.169033 au

G(SMD/M06-2X/6-31G(d)) = -614.222661 au  
E(SMD/M06-2X/def2-TZVP//SMD/M06-2X /6-31G(d)) = -614.6110687 au

|   |             |             |             |
|---|-------------|-------------|-------------|
| C | 0.60499200  | 0.62197400  | 1.16796000  |
| C | 1.75740700  | 0.20814000  | 0.45340000  |
| C | 2.86117400  | -0.28661000 | 1.19328700  |
| C | 1.85183600  | 0.25081000  | -0.96457100 |
| C | 4.00707800  | -0.72422500 | 0.54987900  |
| H | 2.77810300  | -0.31221100 | 2.27547000  |
| C | 2.99901500  | -0.18115900 | -1.60423500 |
| H | 1.01397000  | 0.63691800  | -1.53873400 |
| C | 4.07011800  | -0.66839700 | -0.84488100 |
| H | 4.84955000  | -1.10414300 | 1.11789100  |
| H | 3.07330900  | -0.14747400 | -2.68608300 |
| H | 4.96846900  | -1.00908500 | -1.35194600 |
| C | -0.52519200 | 1.19238400  | 0.49627300  |
| O | -0.51294800 | 2.40140500  | 0.23987900  |
| C | -1.72342300 | 0.33509300  | 0.24165800  |
| C | -2.82097000 | 0.89952300  | -0.41103800 |
| C | -1.74246500 | -1.01407400 | 0.60624000  |
| C | -3.93443000 | 0.11753900  | -0.69898200 |
| H | -2.78156000 | 1.94901200  | -0.68684400 |
| C | -2.85657500 | -1.79584100 | 0.31583700  |
| H | -0.89228400 | -1.44927200 | 1.12715600  |
| C | -3.95208600 | -1.22972300 | -0.33594100 |
| H | -4.78908100 | 0.55509500  | -1.20598000 |
| H | -2.87346800 | -2.84316400 | 0.60093800  |
| H | -4.82228800 | -1.83951600 | -0.56021800 |

**1a** (R = H, R' = OH)

E(SMD/M06-2X/6-31G(d)) = -458.6269486 au  
H(SMD/M06-2X/6-31G(d)) = -458.497667 au  
G(SMD/M06-2X/6-31G(d)) = -458.541357 au  
E(SMD/M06-2X/def2-TZVP//SMD/M06-2X /6-31G(d)) = -458.817644 au

|   |             |             |             |
|---|-------------|-------------|-------------|
| C | 1.05542000  | -1.02388200 | -0.04066100 |
| C | -0.24074600 | -0.44614900 | -0.02823400 |
| C | -1.35123400 | -1.32844000 | -0.00875400 |
| C | -0.48600400 | 0.95469600  | -0.01660100 |
| C | -2.64641800 | -0.83919300 | 0.02810600  |
| H | -1.15169700 | -2.39553800 | -0.02030000 |
| C | -1.77935500 | 1.44132700  | 0.01255400  |
| H | 0.35605900  | 1.64201700  | -0.03807300 |
| C | -2.85342000 | 0.54254600  | 0.03701100  |
| H | -3.49357700 | -1.51648200 | 0.04673700  |
| H | -1.96721000 | 2.50979800  | 0.01885100  |
| H | -3.86829800 | 0.92916500  | 0.06266300  |
| C | 2.19138100  | -0.12821500 | -0.09506900 |
| O | 2.67062200  | 0.25351600  | -1.14892500 |
| O | 2.73398100  | 0.13913900  | 1.10578300  |
| H | 3.55015300  | 0.65367000  | 0.94515400  |

**1a** (R = H, R' = F)

E(SMD/M06-2X/6-31G(d)) = -482.6329535 au

H(SMD/M06-2X/6-31G(d)) = -482.516434 au  
 G(SMD/M06-2X/6-31G(d)) = -482.559919 au  
 E(SMD/M06-2X/def2-TZVP//SMD/M06-2X /6-31G(d)) = -482.8325263 au  
 C -1.06684700 -0.95358500 0.11910800  
 C 0.23474900 -0.41712300 0.06006000  
 C 1.32455100 -1.32947600 0.07477400  
 C 0.51267900 0.97825700 -0.01382800  
 C 2.62888000 -0.87268800 0.01420800  
 H 1.09922900 -2.38978600 0.13310500  
 C 1.81610500 1.43028400 -0.06912400  
 H -0.31445200 1.68370900 -0.01965000  
 C 2.86702200 0.50325200 -0.05643200  
 H 3.46075800 -1.56856300 0.02351100  
 H 2.03099900 2.49207900 -0.12339300  
 H 3.89081800 0.86358400 -0.10155100  
 C -2.20730700 -0.08476300 0.13029800  
 O -2.77024700 0.39907200 1.07176000  
 F -2.74048500 0.02238400 -1.11561000

**I'•B(C<sub>6</sub>F<sub>5</sub>)<sub>3</sub> (R = H, R' = Me)**

E(SMD/M06-2X/6-31G(d)) = -2739.758245 au  
 H(SMD/M06-2X/6-31G(d)) = -2739.406337 au  
 G(SMD/M06-2X/6-31G(d)) = -2739.524287 au  
 E(SMD/M06-2X/def2-TZVP//SMD/M06-2X /6-31G(d)) = -2740.929869 au  
 C -2.64329800 0.38328900 1.61173600  
 N -2.33252700 -1.56158600 1.37847900  
 N -2.43571500 -2.64963100 1.27111600  
 C -4.04531000 0.54170200 1.67018900  
 C -4.75440000 0.85029400 0.48843500  
 C -4.72544000 0.41750900 2.90114900  
 C -6.12396700 1.04931200 0.54770000  
 H -4.21364200 0.93989500 -0.44842900  
 C -6.09564800 0.61329100 2.94526300  
 H -4.16167500 0.17357800 3.79615200  
 C -6.78757400 0.92820200 1.77171000  
 H -6.67857300 1.29657700 -0.35100100  
 H -6.62994000 0.52534200 3.88497600  
 C -1.39718200 0.83906500 1.54355500  
 O -0.31670700 0.09901400 1.44697700  
 B 0.53910900 -0.04835000 0.19865800  
 C 1.15659900 1.39334300 -0.29428600  
 C 1.78512600 2.20631500 0.64659700  
 C 1.23398000 1.85507200 -1.60298700  
 C 2.40184300 3.40995300 0.34213900  
 C 1.84766800 3.05204400 -1.95580300  
 C 2.43353400 3.83657500 -0.97706900  
 C -0.44261200 -0.77637700 -0.90238400  
 C -0.44454600 -2.13066700 -1.21850500  
 C -1.50480100 -0.06247500 -1.45077900  
 C -1.41761700 -2.73568400 -2.00767100  
 C -2.50127500 -0.62102900 -2.23565800



|   |             |             |             |
|---|-------------|-------------|-------------|
| C | -2.46040300 | -1.97821000 | -2.51442100 |
| C | 1.84702800  | -0.93020700 | 0.61881900  |
| C | 2.71676100  | -1.33052700 | -0.39214400 |
| C | 2.27396200  | -1.22397300 | 1.90755000  |
| C | 3.90878000  | -1.99782200 | -0.17291700 |
| C | 3.46697400  | -1.89221100 | 2.17378300  |
| C | 4.28830600  | -2.28184100 | 1.13169200  |
| F | 0.70868500  | 1.15350400  | -2.61898700 |
| F | 1.88012900  | 3.44857900  | -3.23076000 |
| F | 3.02327300  | 4.98749300  | -1.29810000 |
| F | 2.97201100  | 4.15101600  | 1.29570200  |
| F | 1.80650200  | 1.83526100  | 1.93888100  |
| F | 2.39011500  | -1.07189300 | -1.67136900 |
| F | 4.69254300  | -2.36526000 | -1.19035200 |
| F | 5.43223600  | -2.92217200 | 1.37525500  |
| F | 3.82704700  | -2.15399400 | 3.43425300  |
| F | 1.55937300  | -0.87700500 | 2.98694300  |
| F | -1.61317500 | 1.25998700  | -1.21616300 |
| F | -3.50144300 | 0.13084300  | -2.70667100 |
| F | -3.40632500 | -2.54281500 | -3.26184000 |
| F | -1.36333500 | -4.04386700 | -2.26597800 |
| F | 0.49242300  | -2.96124500 | -0.73608300 |
| H | -7.86167000 | 1.08273000  | 1.81237900  |
| C | -1.28562000 | 2.34211900  | 1.68132900  |
| H | -0.52712300 | 2.55061700  | 2.44004700  |
| H | -0.96569300 | 2.75920700  | 0.72296400  |
| H | -2.23161200 | 2.80195800  | 1.97192300  |

**1'• B(C<sub>6</sub>F<sub>5</sub>)<sub>3</sub> (R = H, R' = H)**

E(SMD/M06-2X/6-31G(d)) = -2700.454818 au

H(SMD/M06-2X/6-31G(d)) = -2700.132438 au

G(SMD/M06-2X/6-31G(d)) = -2700.245914 au

E(SMD/M06-2X/def2-TZVP//SMD/M06-2X/6-31G(d)) = -2701.613288 au

|   |             |             |             |
|---|-------------|-------------|-------------|
| C | -2.65455400 | 0.51106500  | 1.55717100  |
| N | -2.44504200 | -1.42480000 | 1.61320700  |
| N | -2.59228700 | -2.50891800 | 1.51656800  |
| C | -4.03729800 | 0.78321500  | 1.62977000  |
| C | -4.80266400 | 0.76099700  | 0.44293500  |
| C | -4.64066500 | 1.08484900  | 2.86927500  |
| C | -6.15424200 | 1.05543300  | 0.50086200  |
| H | -4.31590500 | 0.52062600  | -0.49791800 |
| C | -5.99303600 | 1.38139300  | 2.91147100  |
| H | -4.03369900 | 1.08765800  | 3.76890000  |
| C | -6.74214900 | 1.36377000  | 1.73142900  |
| H | -6.75379000 | 1.04889600  | -0.40282100 |
| H | -6.46962900 | 1.62418400  | 3.85496300  |
| C | -1.38788600 | 0.86497600  | 1.40846500  |
| O | -0.33694500 | 0.08919400  | 1.44910600  |
| B | 0.55039300  | -0.05206200 | 0.21877500  |
| C | 0.90885600  | 1.40847400  | -0.43541000 |
| C | 1.29948700  | 2.45282200  | 0.39740000  |

|   |             |             |             |
|---|-------------|-------------|-------------|
| C | 0.99305800  | 1.68345300  | -1.79591900 |
| C | 1.70826900  | 3.69660900  | -0.06206900 |
| C | 1.40310900  | 2.91093100  | -2.30083700 |
| C | 1.76169300  | 3.92557900  | -1.42797900 |
| C | -0.34120200 | -1.03469300 | -0.75402400 |
| C | -0.21468200 | -2.41840000 | -0.80976100 |
| C | -1.47338400 | -0.53714900 | -1.39617200 |
| C | -1.13207600 | -3.25031800 | -1.44343600 |
| C | -2.42004600 | -1.32693700 | -2.03079100 |
| C | -2.25002800 | -2.70249200 | -2.05181200 |
| C | 1.97452600  | -0.67297700 | 0.70495600  |
| C | 2.87125400  | -1.11026800 | -0.26546000 |
| C | 2.45776700  | -0.70083200 | 2.00694400  |
| C | 4.14641100  | -1.57237100 | 0.00958200  |
| C | 3.73423800  | -1.15620200 | 2.32791100  |
| C | 4.58237700  | -1.59494400 | 1.32725400  |
| F | 0.67096100  | 0.75438900  | -2.70779600 |
| F | 1.45632300  | 3.12192100  | -3.61829300 |
| F | 2.15369300  | 5.10934500  | -1.89695600 |
| F | 2.05709200  | 4.66339900  | 0.79027300  |
| F | 1.28971100  | 2.27867900  | 1.73108600  |
| F | 2.49151200  | -1.09589100 | -1.55540500 |
| F | 4.95653500  | -1.98831800 | -0.96749000 |
| F | 5.80690400  | -2.03133500 | 1.62292200  |
| F | 4.14765700  | -1.16700300 | 3.59881200  |
| F | 1.71741100  | -0.28545000 | 3.04393700  |
| F | -1.71433100 | 0.78756600  | -1.40857300 |
| F | -3.49680000 | -0.77552400 | -2.59975600 |
| F | -3.14396800 | -3.48458700 | -2.65318300 |
| F | -0.95181200 | -4.57237800 | -1.45845600 |
| F | 0.81190300  | -3.04530500 | -0.21457700 |
| H | -7.80260300 | 1.59416400  | 1.77126200  |
| H | -1.27740600 | 1.94578600  | 1.24101800  |

**1'•B(C<sub>6</sub>F<sub>5</sub>)<sub>3</sub> (R = H, R' = Ph)**

E(SMD/M06-2X/6-31G(d)) = -2931.426627 au

H(SMD/M06-2X/6-31G(d)) = -2931.017982 au

G(SMD/M06-2X/6-31G(d)) = -2931.142321 au

E(SMD/M06-2X/def2-TZVP//SMD/M06-2X/6-31G(d)) = -2932.662721 au

|   |            |             |             |
|---|------------|-------------|-------------|
| C | 2.50598600 | -0.05250500 | -1.42262100 |
| N | 1.95105700 | -1.90976100 | -1.65421200 |
| N | 1.92327200 | -2.99369700 | -1.83057100 |
| C | 3.92050000 | -0.06783300 | -1.46359400 |
| C | 4.64418900 | -0.27687100 | -0.26982600 |
| C | 4.59513500 | 0.13258800  | -2.68576200 |
| C | 6.02888300 | -0.26736100 | -0.30314100 |
| H | 4.10352300 | -0.44018300 | 0.65763600  |
| C | 5.98046500 | 0.14803600  | -2.70327200 |
| H | 4.01817100 | 0.28314000  | -3.59263900 |
| C | 6.68993600 | -0.05325700 | -1.51605400 |
| H | 6.59726600 | -0.42277500 | 0.60742800  |

|   |             |             |             |
|---|-------------|-------------|-------------|
| H | 6.51228400  | 0.31304800  | -3.63403000 |
| C | 1.33631600  | 0.54451500  | -1.22292600 |
| O | 0.15183800  | -0.01998800 | -1.31197500 |
| B | -0.74170300 | -0.31212800 | -0.10114700 |
| C | -0.96161800 | 1.04050200  | 0.80388400  |
| C | -1.41572200 | 2.18834200  | 0.15665900  |
| C | -0.77992800 | 1.18483000  | 2.17418100  |
| C | -1.56153600 | 3.42058000  | 0.77400200  |
| C | -0.93308400 | 2.39589700  | 2.84040700  |
| C | -1.31453600 | 3.52445000  | 2.13462600  |
| C | 0.02485400  | -1.54904200 | 0.67506000  |
| C | -0.31362100 | -2.89496900 | 0.56678900  |
| C | 1.23146800  | -1.32460800 | 1.33565800  |
| C | 0.46952000  | -3.93142800 | 1.06563400  |
| C | 2.04661900  | -2.32209800 | 1.84804700  |
| C | 1.66422300  | -3.64647000 | 1.70567400  |
| C | -2.21628500 | -0.70147500 | -0.67848000 |
| C | -3.16622500 | -1.18107100 | 0.21851600  |
| C | -2.68567800 | -0.48637500 | -1.96783100 |
| C | -4.47842600 | -1.46538200 | -0.11727500 |
| C | -3.99754000 | -0.75674600 | -2.34886000 |
| C | -4.89846200 | -1.24959800 | -1.42223100 |
| F | -0.43455600 | 0.14204000  | 2.94523200  |
| F | -0.72219700 | 2.47768700  | 4.15735200  |
| F | -1.45688500 | 4.69362000  | 2.75808500  |
| F | -1.94978500 | 4.49424300  | 0.08099600  |
| F | -1.71950400 | 2.13855100  | -1.15042200 |
| F | -2.80191300 | -1.40519500 | 1.49388500  |
| F | -5.33712000 | -1.93733300 | 0.79092600  |
| F | -6.15709500 | -1.51152600 | -1.77650100 |
| F | -4.39495300 | -0.53507700 | -3.60594300 |
| F | -1.89877600 | 0.00940600  | -2.93318900 |
| F | 1.68477700  | -0.06616200 | 1.50169800  |
| F | 3.19593800  | -2.01702800 | 2.45814000  |
| F | 2.42808100  | -4.62654200 | 2.18194000  |
| F | 0.08369000  | -5.20014300 | 0.92048400  |
| F | -1.42774900 | -3.28821500 | -0.06848900 |
| H | 7.77565500  | -0.04417500 | -1.53629700 |
| C | 1.45906300  | 2.02743600  | -1.02235800 |
| C | 0.81297800  | 2.85423600  | -1.94656400 |
| C | 2.12984700  | 2.57201900  | 0.07383900  |
| C | 0.81122000  | 4.23032300  | -1.75014700 |
| H | 0.29032300  | 2.41146500  | -2.78866200 |
| C | 2.12062800  | 3.95174000  | 0.26436800  |
| H | 2.63437200  | 1.92179900  | 0.78079000  |
| C | 1.45794100  | 4.77829400  | -0.64126400 |
| H | 0.29946400  | 4.87536300  | -2.45747800 |
| H | 2.62612700  | 4.37924100  | 1.12456600  |
| H | 1.44610300  | 5.85268900  | -0.48488000 |

$\mathbf{1}'\cdot\mathbf{B}(\text{C}_6\text{F}_5)_3$  (R = H, R' = OH)

E(SMD/M06-2X/6-31G(d)) = -2775.653778 au  
 H(SMD/M06-2X/6-31G(d)) = -2775.325804 au  
 G(SMD/M06-2X/6-31G(d)) = -2775.441403 au  
 E(SMD/M06-2X/def2-TZVP//SMD/M06-2X /6-31G(d)) = -2776.848871 au

|   |             |             |             |
|---|-------------|-------------|-------------|
| C | -2.59618600 | 0.38259200  | 1.87573700  |
| N | -2.33381000 | -1.60474000 | 1.47499700  |
| N | -2.45065400 | -2.69136900 | 1.36327000  |
| C | -3.98034700 | 0.59191900  | 1.75545200  |
| C | -4.55853300 | 0.91991600  | 0.50234400  |
| C | -4.80151800 | 0.48332500  | 2.90443100  |
| C | -5.91889600 | 1.15227600  | 0.41443100  |
| H | -3.91927300 | 0.99537600  | -0.37097000 |
| C | -6.16192500 | 0.71467000  | 2.80317400  |
| H | -4.34206300 | 0.22294100  | 3.85265200  |
| C | -6.71336300 | 1.04672700  | 1.56160000  |
| H | -6.36939200 | 1.41085600  | -0.53770100 |
| H | -6.79802400 | 0.63995600  | 3.67829500  |
| C | -1.34874700 | 0.82065000  | 1.55517000  |
| O | -0.30722100 | 0.07280800  | 1.43799800  |
| B | 0.56559000  | -0.06314200 | 0.18004400  |
| C | 1.05217400  | 1.39707100  | -0.37439300 |
| C | 1.62100200  | 2.29650500  | 0.52435600  |
| C | 1.06967600  | 1.80580500  | -1.70123000 |
| C | 2.13411800  | 3.53029300  | 0.15723600  |
| C | 1.57929600  | 3.03158100  | -2.11516700 |
| C | 2.11323500  | 3.90067900  | -1.17956200 |
| C | -0.39164900 | -0.90815400 | -0.85220600 |
| C | -0.30795100 | -2.26823100 | -1.12481300 |
| C | -1.52483200 | -0.28958700 | -1.37296400 |
| C | -1.27263100 | -2.96557000 | -1.84656500 |
| C | -2.51479500 | -0.93979200 | -2.09084800 |
| C | -2.38804200 | -2.30051500 | -2.32753000 |
| C | 1.92635200  | -0.83500700 | 0.63141300  |
| C | 2.81218400  | -1.22809600 | -0.36788600 |
| C | 2.37668000  | -1.03976700 | 1.92922800  |
| C | 4.04379800  | -1.81103700 | -0.12758600 |
| C | 3.60914200  | -1.62171000 | 2.21627300  |
| C | 4.44653500  | -2.00924200 | 1.18597000  |
| F | 0.58029900  | 1.02093500  | -2.67422800 |
| F | 1.56042600  | 3.37472000  | -3.40634800 |
| F | 2.60427200  | 5.08060300  | -1.55812000 |
| F | 2.65538300  | 4.35699100  | 1.06820500  |
| F | 1.69258200  | 1.97806700  | 1.82562700  |
| F | 2.46013600  | -1.05039700 | -1.65374500 |
| F | 4.84305300  | -2.17761100 | -1.13287800 |
| F | 5.62847600  | -2.56662200 | 1.45000700  |
| F | 3.99093600  | -1.80359100 | 3.48402400  |
| F | 1.64592700  | -0.68548000 | 2.99485300  |
| F | -1.71333300 | 1.03073700  | -1.16366000 |
| F | -3.58264500 | -0.27554900 | -2.54207500 |

|   |             |             |             |
|---|-------------|-------------|-------------|
| F | -3.32240700 | -2.95533300 | -3.01272200 |
| F | -1.13655800 | -4.27390600 | -2.06830300 |
| F | 0.71239000  | -3.01051100 | -0.67086900 |
| H | -7.78166600 | 1.22693800  | 1.48564400  |
| O | -1.13641500 | 2.14224100  | 1.55458100  |
| H | -1.97628000 | 2.64072100  | 1.50902200  |

**I'•B(C<sub>6</sub>F<sub>5</sub>)<sub>3</sub> (R = H, R' = F)**

E(SMD/M06-2X/6-31G(d)) = -2799.657585 au

H(SMD/M06-2X/6-31G(d)) = -2799.342125 au

G(SMD/M06-2X/6-31G(d)) = -2799.457249 au

E(SMD/M06-2X/def2-TZVP//SMD/M06-2X/6-31G(d)) = -2800.860791 au

|   |             |             |             |
|---|-------------|-------------|-------------|
| C | -2.64229700 | 0.44457800  | 1.63181800  |
| N | -2.38086900 | -1.55557600 | 1.53743800  |
| N | -2.53607500 | -2.63940200 | 1.44907100  |
| C | -4.01837700 | 0.66843700  | 1.63289700  |
| C | -4.70489800 | 0.79886700  | 0.39812800  |
| C | -4.71902600 | 0.78997400  | 2.85910800  |
| C | -6.06049900 | 1.06725100  | 0.39970000  |
| H | -4.14897600 | 0.69741900  | -0.52858200 |
| C | -6.07468000 | 1.05932600  | 2.84394400  |
| H | -4.17410200 | 0.67708300  | 3.79077200  |
| C | -6.73708100 | 1.19514700  | 1.61847900  |
| H | -6.59786600 | 1.17966100  | -0.53540300 |
| H | -6.62335900 | 1.16512000  | 3.77319900  |
| C | -1.36833000 | 0.81645900  | 1.45732600  |
| O | -0.30454800 | 0.11257300  | 1.44544500  |
| B | 0.58102200  | -0.07730500 | 0.18448000  |
| C | 0.98432300  | 1.37003300  | -0.45940400 |
| C | 1.46455300  | 2.37339700  | 0.37857800  |
| C | 1.02171300  | 1.67098600  | -1.81525100 |
| C | 1.91390400  | 3.60430600  | -0.07359300 |
| C | 1.46875200  | 2.88943800  | -2.31274800 |
| C | 1.91623500  | 3.86330200  | -1.43611300 |
| C | -0.34461300 | -1.02715100 | -0.77619900 |
| C | -0.21643100 | -2.40444300 | -0.91700300 |
| C | -1.48262000 | -0.49158600 | -1.37528100 |
| C | -1.14097300 | -3.19456300 | -1.59314600 |
| C | -2.43411600 | -1.23835100 | -2.05103400 |
| C | -2.26288600 | -2.61027600 | -2.15815300 |
| C | 1.97481500  | -0.74451000 | 0.68776000  |
| C | 2.87209600  | -1.18156600 | -0.28269400 |
| C | 2.44220500  | -0.81079500 | 1.99403500  |
| C | 4.13279400  | -1.67914700 | -0.00432500 |
| C | 3.70428900  | -1.30249300 | 2.31813800  |
| C | 4.55323400  | -1.73921100 | 1.31733500  |
| F | 0.61560900  | 0.77967400  | -2.73208200 |
| F | 1.47266400  | 3.12699500  | -3.62690800 |
| F | 2.34748800  | 5.03683000  | -1.89624300 |
| F | 2.35208000  | 4.53202700  | 0.78099900  |
| F | 1.50983900  | 2.16536300  | 1.70402100  |

|   |             |             |             |
|---|-------------|-------------|-------------|
| F | 2.50389000  | -1.13373500 | -1.57508900 |
| F | 4.94293100  | -2.09383700 | -0.98137000 |
| F | 5.76332600  | -2.21059400 | 1.61684500  |
| F | 4.10293700  | -1.34951400 | 3.59249300  |
| F | 1.69992200  | -0.40063700 | 3.03127000  |
| F | -1.71659100 | 0.83384200  | -1.29848300 |
| F | -3.51122200 | -0.65225900 | -2.58132700 |
| F | -3.16066700 | -3.35378100 | -2.79933600 |
| F | -0.96235500 | -4.51258800 | -1.68994700 |
| F | 0.81450300  | -3.06679600 | -0.37332100 |
| H | -7.80256700 | 1.40529900  | 1.61289400  |
| F | -1.23610800 | 2.14365000  | 1.36200900  |

**1a•B(C<sub>6</sub>F<sub>5</sub>)<sub>3</sub> (R = H, R' = Me)**

E(SMD/M06-2X/6-31G(d)) = -2630.281511 au

H(SMD/M06-2X/6-31G(d)) = -2629.939184 au

G(SMD/M06-2X/6-31G(d)) = -2630.051044 au

E(SMD/M06-2X/def2-TZVP//SMD/M06-2X /6-31G(d)) = -2631.408762 au

|   |             |             |             |
|---|-------------|-------------|-------------|
| C | 2.54098600  | 0.51499400  | -1.87177000 |
| C | 3.87129200  | 0.21428700  | -1.91838600 |
| C | 4.72594800  | 0.56939100  | -0.82870200 |
| C | 4.40897700  | -0.45657100 | -3.06082700 |
| C | 6.06588500  | 0.25638500  | -0.88772900 |
| H | 4.30425800  | 1.09774400  | 0.02021800  |
| C | 5.75054700  | -0.76754600 | -3.09688700 |
| H | 3.74160400  | -0.71363500 | -3.87675800 |
| C | 6.56784000  | -0.41143700 | -2.01449900 |
| H | 6.73078100  | 0.52125300  | -0.07361400 |
| H | 6.17594000  | -1.28059200 | -3.95183100 |
| C | 1.26441600  | 0.81697300  | -1.93310800 |
| O | 0.32372300  | -0.06518900 | -1.60780000 |
| B | -0.39204300 | -0.07784600 | -0.27953700 |
| C | -1.28692300 | 1.28917700  | -0.05412500 |
| C | -2.08945300 | 1.74159600  | -1.09971400 |
| C | -1.43931800 | 1.99157000  | 1.13597400  |
| C | -2.94087700 | 2.83237000  | -1.00736700 |
| C | -2.28527700 | 3.08603700  | 1.27676800  |
| C | -3.03997800 | 3.51195000  | 0.19710200  |
| C | 0.77108200  | -0.30884300 | 0.85912600  |
| C | 1.09349300  | -1.52655700 | 1.44884600  |
| C | 1.62781700  | 0.73358600  | 1.19985900  |
| C | 2.15982600  | -1.70065900 | 2.32458700  |
| C | 2.70432900  | 0.60731700  | 2.06277800  |
| C | 2.98119700  | -0.62805400 | 2.62637500  |
| C | -1.50721600 | -1.27199000 | -0.35038900 |
| C | -2.19924400 | -1.59951100 | 0.81256100  |
| C | -1.94906000 | -1.92369200 | -1.49503700 |
| C | -3.23053300 | -2.52040800 | 0.87120400  |
| C | -2.98484500 | -2.85541200 | -1.48209000 |
| C | -3.62851200 | -3.15736500 | -0.29593300 |
| F | -0.76171200 | 1.64164500  | 2.24066400  |

|   |             |             |             |
|---|-------------|-------------|-------------|
| F | -2.37958100 | 3.72678100  | 2.44536000  |
| F | -3.85479000 | 4.56024500  | 0.31396200  |
| F | -3.67279900 | 3.22335800  | -2.05440300 |
| F | -2.06554600 | 1.10669500  | -2.28456200 |
| F | -1.85559300 | -0.99966800 | 1.96696300  |
| F | -3.84499300 | -2.79714600 | 2.02499000  |
| F | -4.62051800 | -4.04852600 | -0.27195300 |
| F | -3.36515900 | -3.45764800 | -2.61364200 |
| F | -1.40321500 | -1.69368200 | -2.69723300 |
| F | 1.43425700  | 1.95989200  | 0.67801900  |
| F | 3.51137700  | 1.64845400  | 2.30128200  |
| F | 4.02220700  | -0.78063300 | 3.44335000  |
| F | 2.41163300  | -2.89865900 | 2.85831900  |
| F | 0.37729900  | -2.63318000 | 1.19595600  |
| H | 7.62508200  | -0.65789800 | -2.05106500 |
| C | 0.88855000  | 2.18930700  | -2.43210500 |
| H | 0.12067200  | 2.07097700  | -3.20139200 |
| H | 0.48241700  | 2.77051900  | -1.59948600 |
| H | 1.74817900  | 2.71964700  | -2.84869900 |

**1a•B(C<sub>6</sub>F<sub>5</sub>)<sub>3</sub> (R = H, R' = H)**

E(SMD/M06-2X/6-31G(d)) = -2590.977729 au

H(SMD/M06-2X/6-31G(d)) = -2590.665301 au

G(SMD/M06-2X/6-31G(d)) = -2590.774321 au

E(SMD/M06-2X/def2-TZVP//SMD/M06-2X /6-31G(d)) = -2592.092331 au

|   |             |             |             |
|---|-------------|-------------|-------------|
| C | -2.68322900 | 1.06254900  | 1.68313700  |
| C | -4.02815200 | 0.97454100  | 1.86838900  |
| C | -4.85782700 | 0.63258100  | 0.75239400  |
| C | -4.60938400 | 1.20693500  | 3.15408800  |
| C | -6.21915400 | 0.52752800  | 0.92929100  |
| H | -4.39036800 | 0.47244700  | -0.21471500 |
| C | -5.97281000 | 1.09592000  | 3.30833100  |
| H | -3.95876600 | 1.46385500  | 3.98344500  |
| C | -6.76572700 | 0.75769000  | 2.20073300  |
| H | -6.86673300 | 0.27116200  | 0.09868700  |
| H | -6.43605800 | 1.26601800  | 4.27351200  |
| C | -1.42196200 | 1.18875600  | 1.35837500  |
| O | -0.50300700 | 0.24792900  | 1.46600100  |
| B | 0.36924100  | -0.05802400 | 0.26971400  |
| C | 0.90703400  | 1.32250600  | -0.44639000 |
| C | 1.43791000  | 2.33199600  | 0.35297400  |
| C | 1.01455900  | 1.54784200  | -1.81440000 |
| C | 2.00105400  | 3.49865900  | -0.14350400 |
| C | 1.57623800  | 2.69754200  | -2.35622000 |
| C | 2.07131000  | 3.68119800  | -1.51559900 |
| C | -0.58586600 | -0.98974000 | -0.69557300 |
| C | -0.54665900 | -2.37743100 | -0.77081400 |
| C | -1.65419400 | -0.41395800 | -1.37860800 |
| C | -1.47791400 | -3.13857400 | -1.47011300 |
| C | -2.61474200 | -1.13001600 | -2.07429400 |
| C | -2.52681200 | -2.51254600 | -2.12074100 |

|   |             |             |             |
|---|-------------|-------------|-------------|
| C | 1.71823400  | -0.79919400 | 0.81038200  |
| C | 2.59729100  | -1.33442600 | -0.12689600 |
| C | 2.16482400  | -0.84292300 | 2.12477000  |
| C | 3.81842700  | -1.90289600 | 0.19012300  |
| C | 3.38708100  | -1.40387600 | 2.48815100  |
| C | 4.21773500  | -1.93669500 | 1.51917500  |
| F | 0.57351600  | 0.64373400  | -2.70136400 |
| F | 1.64658500  | 2.86185100  | -3.67965400 |
| F | 2.60958300  | 4.79033700  | -2.02067900 |
| F | 2.48103000  | 4.43435100  | 0.67955200  |
| F | 1.41770400  | 2.20012200  | 1.69137300  |
| F | 2.25358300  | -1.31347600 | -1.42724500 |
| F | 4.61250500  | -2.40935000 | -0.75745600 |
| F | 5.39067300  | -2.47477900 | 1.85544400  |
| F | 3.76611400  | -1.42477200 | 3.76995200  |
| F | 1.44059600  | -0.34150700 | 3.13473200  |
| F | -1.80492500 | 0.92544300  | -1.38758000 |
| F | -3.63149600 | -0.50156100 | -2.67485900 |
| F | -3.43870100 | -3.22653300 | -2.77978400 |
| F | -1.37905300 | -4.47019700 | -1.50103300 |
| F | 0.41092300  | -3.08153900 | -0.14603600 |
| H | -7.84045700 | 0.67168500  | 2.33287600  |
| H | -1.15109900 | 2.18858500  | 0.98839300  |

**1a**•B(C<sub>6</sub>F<sub>5</sub>)<sub>3</sub> (R = H, R' = Ph)

E(SMD/M06-2X/6-31G(d)) = -2821.950769 au

H(SMD/M06-2X/6-31G(d)) = -2821.551927 au

G(SMD/M06-2X/6-31G(d)) = -2821.671464 au

E(SMD/M06-2X/def2-TZVP//SMD/M06-2X/6-31G(d)) = -2823.142621 au

|   |             |             |             |
|---|-------------|-------------|-------------|
| C | -2.47433200 | 0.61940300  | 1.46578600  |
| C | -3.80486800 | 0.35853400  | 1.62579300  |
| C | -4.63733600 | 0.17706800  | 0.47836800  |
| C | -4.36077300 | 0.26025200  | 2.93840300  |
| C | -5.97584700 | -0.09927500 | 0.64852700  |
| H | -4.19692300 | 0.26504700  | -0.50967600 |
| C | -5.70255000 | -0.01503000 | 3.08682800  |
| H | -3.70931300 | 0.40271000  | 3.79426500  |
| C | -6.49893600 | -0.19439400 | 1.94649900  |
| H | -6.62282700 | -0.24132600 | -0.20959800 |
| H | -6.14318100 | -0.09508400 | 4.07400100  |
| C | -1.21425100 | 0.95392300  | 1.33099100  |
| O | -0.19691600 | 0.10114800  | 1.40970300  |
| B | 0.51640600  | -0.41054600 | 0.17088600  |
| C | 1.08666100  | 0.84660800  | -0.72943500 |
| C | 1.82276800  | 1.83060300  | -0.07068100 |
| C | 0.96173300  | 1.04454400  | -2.09950500 |
| C | 2.28639800  | 2.98883200  | -0.67502000 |
| C | 1.42727400  | 2.18024900  | -2.75310100 |
| C | 2.08397600  | 3.16549000  | -2.03535600 |
| C | -0.58201100 | -1.36843500 | -0.60177600 |
| C | -0.63691700 | -2.75603800 | -0.49571700 |



|   |             |             |             |
|---|-------------|-------------|-------------|
| C | -1.64642100 | -0.81900700 | -1.31196700 |
| C | -1.63762000 | -3.53814700 | -1.06225200 |
| C | -2.66854000 | -1.55589100 | -1.89006200 |
| C | -2.66887300 | -2.93490300 | -1.76087400 |
| C | 1.84813300  | -1.20925100 | 0.67872200  |
| C | 2.59089200  | -1.91931500 | -0.26021900 |
| C | 2.40878300  | -1.15786500 | 1.94870600  |
| C | 3.78407600  | -2.56327600 | 0.01783700  |
| C | 3.60791000  | -1.78850900 | 2.27178500  |
| C | 4.29920200  | -2.49538500 | 1.30456000  |
| F | 0.36638400  | 0.13264800  | -2.88458900 |
| F | 1.25530800  | 2.32372800  | -4.07079400 |
| F | 2.53073400  | 4.26203800  | -2.64760200 |
| F | 2.94227300  | 3.91558000  | 0.02922000  |
| F | 2.10803800  | 1.68925700  | 1.23397400  |
| F | 2.13315300  | -2.00842100 | -1.52238500 |
| F | 4.44147500  | -3.23933700 | -0.92900300 |
| F | 5.44916500  | -3.10219900 | 1.60209100  |
| F | 4.10031300  | -1.70881800 | 3.51243900  |
| F | 1.82867900  | -0.48440000 | 2.95192900  |
| F | -1.74085800 | 0.51641300  | -1.47330400 |
| F | -3.66619000 | -0.94161000 | -2.53740200 |
| F | -3.64378900 | -3.66581000 | -2.29818300 |
| F | -1.62096100 | -4.86576600 | -0.92103800 |
| F | 0.29508000  | -3.44068000 | 0.18570600  |
| H | -7.55540700 | -0.41327900 | 2.07230300  |
| C | -0.97102300 | 2.42532300  | 1.19096200  |
| C | -0.13140900 | 3.04144800  | 2.12571300  |
| C | -1.50567900 | 3.15262800  | 0.12495100  |
| C | 0.20121700  | 4.38089300  | 1.96653000  |
| H | 0.28005000  | 2.45804900  | 2.94336900  |
| C | -1.17128800 | 4.49677000  | -0.02338700 |
| H | -2.15244400 | 2.66059300  | -0.59406900 |
| C | -0.31443300 | 5.10695600  | 0.89037200  |
| H | 0.86657800  | 4.85984000  | 2.67804300  |
| H | -1.57146900 | 5.06268500  | -0.85873500 |
| H | -0.04647800 | 6.15188100  | 0.76662600  |

**1a•B(C<sub>6</sub>F<sub>5</sub>)<sub>3</sub> (R = H, R' = OH)**

E(SMD/M06-2X/6-31G(d)) = -2666.176984 au

H(SMD/M06-2X/6-31G(d)) = -2665.858725 au

G(SMD/M06-2X/6-31G(d)) = -2665.970858 au

E(SMD/M06-2X/def2-TZVP//SMD/M06-2X/6-31G(d)) = -2667.328915 au

|   |            |             |             |
|---|------------|-------------|-------------|
| C | 2.53138300 | 0.66614200  | -1.70963700 |
| C | 3.81119100 | 0.23877500  | -1.90343900 |
| C | 4.79625400 | 0.47894000  | -0.89132300 |
| C | 4.18096800 | -0.44927600 | -3.10485300 |
| C | 6.08883800 | 0.04327800  | -1.07837500 |
| H | 4.50016900 | 1.01583200  | 0.00494200  |
| C | 5.47727700 | -0.88115200 | -3.27209400 |
| H | 3.41988300 | -0.62131200 | -3.85905200 |

|   |             |             |             |
|---|-------------|-------------|-------------|
| C | 6.41947000  | -0.63432400 | -2.26155200 |
| H | 6.84731700  | 0.21701200  | -0.32375000 |
| H | 5.77373300  | -1.40808700 | -4.17198900 |
| C | 1.21992600  | 0.85707800  | -1.87141200 |
| O | 0.39969800  | -0.09189600 | -1.51804500 |
| B | -0.38997600 | -0.06762900 | -0.20291200 |
| C | -1.33049500 | 1.27121900  | -0.10595900 |
| C | -2.09968400 | 1.63037600  | -1.21035300 |
| C | -1.54794800 | 2.03890600  | 1.03126400  |
| C | -2.98446300 | 2.69767200  | -1.21804300 |
| C | -2.42745500 | 3.11494200  | 1.06919800  |
| C | -3.14890800 | 3.44890900  | -0.06397200 |
| C | 0.75908500  | -0.18593000 | 0.96116800  |
| C | 1.13336000  | -1.36046200 | 1.60453900  |
| C | 1.57460600  | 0.90776400  | 1.24183700  |
| C | 2.21913400  | -1.45140600 | 2.46879300  |
| C | 2.67502400  | 0.85983600  | 2.08231000  |
| C | 3.00515800  | -0.33603300 | 2.70050900  |
| C | -1.43579900 | -1.31749400 | -0.25730000 |
| C | -2.15217600 | -1.61905000 | 0.89770800  |
| C | -1.79790500 | -2.05175300 | -1.37943000 |
| C | -3.13452600 | -2.59089200 | 0.97105200  |
| C | -2.78190000 | -3.03747400 | -1.35055500 |
| C | -3.45296600 | -3.31014600 | -0.17247600 |
| F | -0.90376700 | 1.77566500  | 2.17911600  |
| F | -2.58610700 | 3.82479500  | 2.19037200  |
| F | -3.99730400 | 4.47735500  | -0.04485300 |
| F | -3.68674500 | 3.00004400  | -2.31413600 |
| F | -2.01222400 | 0.91771900  | -2.34387500 |
| F | -1.88150000 | -0.94051200 | 2.02710000  |
| F | -3.77684300 | -2.83939600 | 2.11563500  |
| F | -4.39713900 | -4.25092700 | -0.13436300 |
| F | -3.08608500 | -3.71978700 | -2.45903900 |
| F | -1.21807500 | -1.85496300 | -2.57142800 |
| F | 1.31709200  | 2.09794300  | 0.67075000  |
| F | 3.45225700  | 1.93516700  | 2.25412700  |
| F | 4.06690200  | -0.41038000 | 3.50176800  |
| F | 2.52396500  | -2.61175200 | 3.05532000  |
| F | 0.45819800  | -2.50447400 | 1.41364400  |
| H | 7.44033200  | -0.97849600 | -2.40097000 |
| O | 0.67182800  | 1.99462100  | -2.31010100 |
| H | 1.35789900  | 2.65223900  | -2.53631600 |

**1a•B(C<sub>6</sub>F<sub>5</sub>)<sub>3</sub> (R = H, R' = F)**

E(SMD/M06-2X/6-31G(d)) = -2690.182299 au

H(SMD/M06-2X/6-31G(d)) = -2689.876411 au

G(SMD/M06-2X/6-31G(d)) = -2689.987519 au

E(SMD/M06-2X/def2-TZVP//SMD/M06-2X /6-31G(d)) = -2691.341503 au

|   |            |            |             |
|---|------------|------------|-------------|
| C | 2.56099900 | 0.72302700 | -1.79004500 |
| C | 3.88190600 | 0.45634900 | -1.90865100 |
| C | 4.74734000 | 0.62048500 | -0.77357700 |

|   |             |             |             |
|---|-------------|-------------|-------------|
| C | 4.42323800  | 0.02287500  | -3.16668500 |
| C | 6.09058000  | 0.35968800  | -0.90319100 |
| H | 4.31994400  | 0.96516700  | 0.16269800  |
| C | 5.76857500  | -0.23927700 | -3.27039000 |
| H | 3.74946200  | -0.09233600 | -4.00931300 |
| C | 6.59015200  | -0.07004800 | -2.14376600 |
| H | 6.76312400  | 0.48197700  | -0.06205600 |
| H | 6.19825400  | -0.57131700 | -4.20838200 |
| C | 1.26145400  | 0.94877200  | -1.74853100 |
| O | 0.37076500  | 0.03875500  | -1.55805000 |
| B | -0.41416400 | -0.08986200 | -0.23561900 |
| C | -1.15385500 | 1.32499700  | 0.13306100  |
| C | -1.84917600 | 2.00432700  | -0.86463900 |
| C | -1.27789000 | 1.86995800  | 1.40548700  |
| C | -2.57828100 | 3.16258800  | -0.64375100 |
| C | -2.00257000 | 3.02548000  | 1.67308400  |
| C | -2.65551900 | 3.67800300  | 0.64118200  |
| C | 0.70827500  | -0.57830700 | 0.85275000  |
| C | 0.90495400  | -1.88884300 | 1.27476200  |
| C | 1.65711700  | 0.32432900  | 1.32539500  |
| C | 1.94553300  | -2.27947700 | 2.11073200  |
| C | 2.71447000  | -0.02089100 | 2.15126400  |
| C | 2.86543900  | -1.34095100 | 2.54556900  |
| C | -1.61933200 | -1.15019600 | -0.50809200 |
| C | -2.36986300 | -1.57786000 | 0.58366500  |
| C | -2.08005200 | -1.58639900 | -1.74385300 |
| C | -3.47689900 | -2.40244100 | 0.48924100  |
| C | -3.19111100 | -2.41469600 | -1.88441700 |
| C | -3.89254000 | -2.82594400 | -0.76562300 |
| F | -0.68807800 | 1.29537400  | 2.46497800  |
| F | -2.07710800 | 3.50863700  | 2.91614600  |
| F | -3.35379300 | 4.78758100  | 0.87992300  |
| F | -3.21413500 | 3.77537300  | -1.64584500 |
| F | -1.83928000 | 1.53344800  | -2.12185900 |
| F | -2.00597300 | -1.18286500 | 1.81663700  |
| F | -4.14645500 | -2.78776300 | 1.57864900  |
| F | -4.95723500 | -3.61853900 | -0.88914000 |
| F | -3.58765500 | -2.81088700 | -3.09759800 |
| F | -1.47835600 | -1.23342400 | -2.88784700 |
| F | 1.58026400  | 1.62295000  | 0.97864400  |
| F | 3.61054700  | 0.89841800  | 2.52831800  |
| F | 3.88027600  | -1.69967300 | 3.32927100  |
| F | 2.07639900  | -3.55595700 | 2.47839600  |
| F | 0.08544900  | -2.87586100 | 0.88292300  |
| H | 7.65250800  | -0.27776600 | -2.23564900 |
| F | 0.84666000  | 2.20544100  | -1.92612000 |

**B(C<sub>6</sub>F<sub>5</sub>)<sub>3</sub>**

E(SMD/M06-2X/6-31G(d)) = -2207.513266 au

H(SMD/M06-2X/6-31G(d)) = -2207.326627 au

G(SMD/M06-2X/6-31G(d)) = -2207.414735 au

E(SMD/M06-2X/def2-TZVP//SMD/M06-2X /6-31G(d)) = -2208.482503 au

|   |             |             |             |
|---|-------------|-------------|-------------|
| B | 0.00022400  | 0.00013800  | 0.00117600  |
| C | 1.51100500  | 0.42357000  | 0.00020400  |
| C | 2.49865200  | -0.33137800 | -0.63852900 |
| C | 3.83560000  | 0.03076200  | -0.65602500 |
| C | 4.23440500  | 1.18579000  | 0.00084100  |
| C | 3.29358900  | 1.96634700  | 0.65674100  |
| C | 1.96286200  | 1.58193600  | 0.63851900  |
| C | -0.38891300 | -1.51999700 | 0.00055200  |
| C | -1.54011300 | -1.99696000 | -0.63277000 |
| C | -1.89507800 | -3.33574200 | -0.65045700 |
| C | -1.09027600 | -4.25982100 | -0.00014900 |
| C | 0.05938100  | -3.83647500 | 0.65059800  |
| C | 0.39151800  | -2.49178300 | 0.63321800  |
| C | -1.12134400 | 1.09752000  | 0.00190500  |
| C | -2.35131900 | 0.90899200  | 0.63822900  |
| C | -3.35059000 | 1.86810000  | 0.65326600  |
| C | -3.14443800 | 3.07305400  | -0.00245100 |
| C | -1.94295000 | 3.30694600  | -0.65518800 |
| C | -0.96032100 | 2.33080900  | -0.63567900 |
| F | 2.17884900  | -1.45500500 | -1.28563500 |
| F | 4.73593600  | -0.71739200 | -1.29002500 |
| F | 5.51095300  | 1.54268700  | 0.00158700  |
| F | 3.67431300  | 3.07313700  | 1.29099400  |
| F | 1.10607500  | 2.37675200  | 1.28491900  |
| F | -2.35710100 | -1.15793500 | -1.27471900 |
| F | -2.99655900 | -3.74037100 | -1.27916800 |
| F | -1.41908100 | -5.54389200 | -0.00038400 |
| F | 0.83049000  | -4.72101100 | 1.27934700  |
| F | 1.51134000  | -2.14861100 | 1.27487400  |
| F | 0.17379600  | 2.61662100  | -1.28056800 |
| F | -1.74505600 | 4.46100100  | -1.28875100 |
| F | -4.09302500 | 3.99883900  | -0.00497500 |
| F | -4.50108600 | 1.64401900  | 1.28457700  |
| F | -2.61108300 | -0.23003000 | 1.28539100  |

**N<sub>2</sub>**

E(SMD/M06-2X/6-31G(d)) = -109.482264 au

H(SMD/M06-2X/6-31G(d)) = -109.473155 au

G(SMD/M06-2X/6-31G(d)) = -109.494898 au

E(SMD/M06-2X/def2-TZVP//SMD/M06-2X /6-31G(d)) = -109.5302842 au

|   |            |            |            |
|---|------------|------------|------------|
| N | 0.00000000 | 0.00000000 | 0.54917900 |
|---|------------|------------|------------|

|   |            |            |             |
|---|------------|------------|-------------|
| N | 0.00000000 | 0.00000000 | -0.54917900 |
|---|------------|------------|-------------|

**1•B(C<sub>6</sub>F<sub>5</sub>)<sub>3</sub> (R = NMe<sub>2</sub>, R' = OMe)**

E(SMD/M06-2X/6-31G(d)) = -2948.895071 au

H(SMD/M06-2X/6-31G(d)) = -2948.454843 au

G(SMD/M06-2X/6-31G(d)) = -2948.582377 au

E(SMD/M06-2X/def2-TZVP//SMD/M06-2X /6-31G(d)) = -2950.147847 au

|   |             |            |             |
|---|-------------|------------|-------------|
| C | -2.14755700 | 0.24341800 | -1.19991400 |
|---|-------------|------------|-------------|

|   |             |            |             |
|---|-------------|------------|-------------|
| N | -1.78877000 | 1.53134000 | -1.38566100 |
|---|-------------|------------|-------------|

|   |             |            |             |
|---|-------------|------------|-------------|
| N | -1.55641000 | 2.61228000 | -1.52717800 |
|---|-------------|------------|-------------|

|   |             |             |             |
|---|-------------|-------------|-------------|
| C | -3.60737900 | 0.00374600  | -1.10751600 |
| C | -4.28430600 | 0.26056900  | 0.09100800  |
| C | -4.34064800 | -0.45210600 | -2.20766300 |
| C | -5.64828400 | 0.05665100  | 0.19932100  |
| H | -3.72530100 | 0.61554100  | 0.95405400  |
| C | -5.70501800 | -0.66943400 | -2.11486100 |
| H | -3.83154100 | -0.64719200 | -3.14771500 |
| C | -6.39961500 | -0.41970700 | -0.90479300 |
| H | -6.13529600 | 0.26568100  | 1.14388000  |
| H | -6.23738600 | -1.03016000 | -2.98635300 |
| C | -1.01586900 | -0.58772800 | -1.04065500 |
| O | 0.14827000  | -0.08566800 | -1.24213000 |
| B | 1.24147800  | 0.08726500  | -0.14766900 |
| C | 1.48424800  | -1.30239300 | 0.67197000  |
| C | 1.71124500  | -2.47256900 | -0.04860100 |
| C | 1.60092200  | -1.42818000 | 2.04965500  |
| C | 1.99156300  | -3.69516600 | 0.53984100  |
| C | 1.88708600  | -2.63339700 | 2.68183000  |
| C | 2.08202000  | -3.77409800 | 1.92239300  |
| C | 0.62759800  | 1.32283900  | 0.74110400  |
| C | 1.01870700  | 2.65509900  | 0.66558900  |
| C | -0.52367700 | 1.10517000  | 1.49562200  |
| C | 0.32458700  | 3.69267600  | 1.28088500  |
| C | -1.25493200 | 2.10536300  | 2.11460500  |
| C | -0.82587800 | 3.41974000  | 2.00152500  |
| C | 2.63653200  | 0.41125200  | -0.91295100 |
| C | 3.72621900  | 0.79444900  | -0.13649700 |
| C | 2.91116800  | 0.22026300  | -2.26059200 |
| C | 4.99806000  | 1.00701400  | -0.63820800 |
| C | 4.17604500  | 0.42226900  | -2.80707400 |
| C | 5.22386200  | 0.81666800  | -1.99472600 |
| F | 1.43441200  | -0.37003400 | 2.85761800  |
| F | 1.97846700  | -2.69804400 | 4.01284000  |
| F | 2.35640500  | -4.93730300 | 2.51172300  |
| F | 2.18609900  | -4.78838200 | -0.20260700 |
| F | 1.65425700  | -2.44423400 | -1.38854900 |
| F | 3.54658800  | 0.98519000  | 1.18236100  |
| F | 6.00057500  | 1.38557600  | 0.15841400  |
| F | 6.43886800  | 1.01057300  | -2.50719700 |
| F | 4.38583600  | 0.22991600  | -4.11252900 |
| F | 1.96579500  | -0.17757000 | -3.12245700 |

|   |             |             |             |
|---|-------------|-------------|-------------|
| F | -1.00799300 | -0.14843700 | 1.62000700  |
| F | -2.36969400 | 1.81985400  | 2.79302200  |
| F | -1.50758800 | 4.40289100  | 2.58352600  |
| F | 0.75127400  | 4.95105500  | 1.16811300  |
| F | 2.09659900  | 3.02709700  | -0.03890000 |
| O | -1.05319900 | -1.85083600 | -0.73085500 |
| C | -2.22920300 | -2.51923200 | -0.23343300 |
| H | -2.64608400 | -1.96496700 | 0.60749000  |
| H | -2.96447300 | -2.63705300 | -1.02956000 |
| H | -1.86586700 | -3.49163800 | 0.09554600  |
| N | -7.74389300 | -0.63019700 | -0.80562500 |
| C | -8.50011500 | -1.04537200 | -1.97272700 |
| H | -9.55055200 | -1.13829000 | -1.69867700 |
| H | -8.41894000 | -0.31503800 | -2.78795300 |
| H | -8.15651900 | -2.01734300 | -2.34626700 |
| C | -8.43681500 | -0.31895900 | 0.43111100  |
| H | -9.49211500 | -0.56489700 | 0.31689900  |
| H | -8.03842100 | -0.90477900 | 1.26776300  |
| H | -8.35444800 | 0.74544600  | 0.68639500  |

**1•B(C<sub>6</sub>F<sub>5</sub>)<sub>3</sub> (R = NH<sub>2</sub>, R' = OMe)**

E(SMD/M06-2X/6-31G(d)) = -2870.322167 au

H(SMD/M06-2X/6-31G(d)) = -2869.942516 au

G(SMD/M06-2X/6-31G(d)) = -2870.06209 au

E(SMD/M06-2X/def2-TZVP//SMD/M06-2X /6-31G(d)) = -2871.552012 au

|   |            |             |             |
|---|------------|-------------|-------------|
| C | 2.53237600 | -0.15791000 | -1.26532400 |
| N | 2.23085000 | -1.46435800 | -1.40467000 |
| N | 2.03852100 | -2.55774600 | -1.50717800 |
| C | 3.97582200 | 0.17679300  | -1.29579900 |
| C | 4.78114700 | -0.09800700 | -0.18358800 |
| C | 4.55389300 | 0.75789100  | -2.42951000 |
| C | 6.13098100 | 0.20878200  | -0.19637600 |
| H | 4.33415100 | -0.54501300 | 0.70175500  |
| C | 5.90171400 | 1.07955600  | -2.44549500 |
| H | 3.93792000 | 0.96600800  | -3.30002000 |
| C | 6.71470600 | 0.80800300  | -1.32914000 |
| H | 6.74906400 | -0.00327600 | 0.67144800  |
| H | 6.34400500 | 1.54031300  | -3.32433200 |
| C | 1.37265100 | 0.62646200  | -1.07076400 |
| O | 0.22577600 | 0.07942100  | -1.24059800 |
| O | 1.37705400 | 1.88967500  | -0.75723700 |
| C | 2.52151000 | 2.56827300  | -0.20091300 |
| H | 2.97195100 | 1.96034400  | 0.58349300  |

|   |             |             |             |
|---|-------------|-------------|-------------|
| H | 3.24388700  | 2.79737400  | -0.98425700 |
| H | 2.11184200  | 3.48618400  | 0.21837400  |
| B | -0.85042600 | -0.10352200 | -0.12843200 |
| C | -1.11666600 | 1.28791900  | 0.67888200  |
| C | -1.38889500 | 2.44259700  | -0.05096400 |
| C | -1.21231100 | 1.42625200  | 2.05685200  |
| C | -1.69438900 | 3.66337900  | 0.52837800  |
| C | -1.52167300 | 2.63037200  | 2.68036000  |
| C | -1.76333300 | 3.75573500  | 1.91150400  |
| C | -0.18700200 | -1.31290000 | 0.76049600  |
| C | -0.53906700 | -2.65680200 | 0.70315200  |
| C | 0.97519500  | -1.05493300 | 1.48475500  |
| C | 0.20191900  | -3.66800300 | 1.30787800  |
| C | 1.75452500  | -2.02756000 | 2.08868300  |
| C | 1.36203600  | -3.35505500 | 1.99634600  |
| C | -2.24572600 | -0.47343500 | -0.87122300 |
| C | -3.31348800 | -0.87965100 | -0.07633300 |
| C | -2.54324600 | -0.30316000 | -2.21677300 |
| C | -4.58512800 | -1.13337500 | -0.55911200 |
| C | -3.80879300 | -0.54654600 | -2.74450300 |
| C | -4.83387100 | -0.96329100 | -1.91433700 |
| F | -1.00103800 | 0.38253200  | 2.87305300  |
| F | -1.59187800 | 2.70802000  | 4.01187000  |
| F | -2.06144200 | 4.91735700  | 2.49222700  |
| F | -1.93241600 | 4.74199800  | -0.22254800 |
| F | -1.35103400 | 2.39958800  | -1.39128300 |
| F | -3.11070800 | -1.05180300 | 1.24164300  |
| F | -5.56590900 | -1.53290200 | 0.25411300  |
| F | -6.04914300 | -1.19783500 | -2.40866800 |
| F | -4.04133800 | -0.37296000 | -4.04868100 |
| F | -1.62093300 | 0.11449600  | -3.09413000 |
| F | 1.42238300  | 0.21433000  | 1.58981700  |
| F | 2.88016300  | -1.70305600 | 2.73011600  |
| F | 2.08899800  | -4.31324200 | 2.56499100  |
| F | -0.18864500 | -4.93955400 | 1.21451700  |
| F | -1.62190300 | -3.06614700 | 0.02775600  |
| N | 8.04169000  | 1.17319100  | -1.32355200 |
| H | 8.47631300  | 1.29660300  | -2.23015300 |
| H | 8.63719600  | 0.69296000  | -0.65960000 |

**1**•B(C<sub>6</sub>F<sub>5</sub>)<sub>3</sub> (R = OMe, R' = OMe)

E(SMD/M06-2X/6-31G(d)) = -2929.462368 au

H(SMD/M06-2X/6-31G(d)) = -2929.064847 au

G(SMD/M06-2X/6-31G(d)) = -2929.187428 au

E(SMD/M06-2X/def2-TZVP//SMD/M06-2X /6-31G(d)) = -2930.712882 au

|   |             |             |             |
|---|-------------|-------------|-------------|
| C | 2.39715800  | -0.26847500 | -1.07398800 |
| N | 2.03603500  | -1.54478000 | -1.30704600 |
| N | 1.78402800  | -2.61577400 | -1.48609800 |
| C | 3.85694400  | -0.00754800 | -1.01921200 |
| C | 4.60065700  | -0.43276200 | 0.09153700  |
| C | 4.49996600  | 0.65187500  | -2.06542400 |
| C | 5.96089200  | -0.19462300 | 0.15131600  |
| H | 4.09755400  | -0.93673100 | 0.91334600  |
| C | 5.86748400  | 0.91035900  | -2.00927100 |
| H | 3.92750100  | 0.97607400  | -2.92979800 |
| C | 6.60246600  | 0.48157300  | -0.89873200 |
| H | 6.55216500  | -0.51334500 | 1.00347000  |
| H | 6.34604900  | 1.43288100  | -2.82878500 |
| C | 1.27182700  | 0.56871000  | -0.89338400 |
| O | 0.11095800  | 0.09998800  | -1.16325800 |
| O | 1.32923200  | 1.80591600  | -0.49404000 |
| C | 2.46532700  | 2.36518500  | 0.19651000  |
| H | 2.84220900  | 1.65668800  | 0.93380600  |
| H | 3.24179100  | 2.64140000  | -0.51694500 |
| H | 2.07065800  | 3.25200000  | 0.69055800  |
| B | -1.04546700 | -0.07975900 | -0.13117200 |
| C | -1.28458100 | 1.27902000  | 0.73707600  |
| C | -1.44207500 | 2.48583600  | 0.05983800  |
| C | -1.46091200 | 1.34845800  | 2.11239300  |
| C | -1.71367900 | 3.68992000  | 0.68870500  |
| C | -1.74241300 | 2.53340800  | 2.78388500  |
| C | -1.86809100 | 3.71134400  | 2.06783900  |
| C | -0.50784600 | -1.37237800 | 0.72490200  |
| C | -0.93307300 | -2.68792200 | 0.57613800  |
| C | 0.62023400  | -1.22251400 | 1.52925200  |
| C | -0.29086200 | -3.77077100 | 1.16977000  |
| C | 1.30476600  | -2.26913900 | 2.12382700  |
| C | 0.84149500  | -3.56379300 | 1.93974600  |
| C | -2.40526000 | -0.32788300 | -0.98178300 |
| C | -3.54404700 | -0.71610900 | -0.28216000 |
| C | -2.60143400 | -0.07251900 | -2.33257600 |
| C | -4.79028200 | -0.87846900 | -0.86081100 |
| C | -3.83820000 | -0.22218200 | -2.95491100 |
| C | -4.93700600 | -0.62625000 | -2.21808100 |
| F | -1.35925100 | 0.25196600  | 2.87869600  |
| F | -1.89491400 | 2.54294200  | 4.11064200  |
| F | -2.13599900 | 4.85576300  | 2.69521000  |
| F | -1.84026100 | 4.81978900  | -0.01214500 |
| F | -1.31925900 | 2.51329400  | -1.27577700 |
| F | -3.44122700 | -0.96703400 | 1.03467300  |
| F | -5.84280200 | -1.26671700 | -0.13678900 |
| F | -6.12567700 | -0.77107700 | -2.80315200 |
| F | -3.97153900 | 0.02984500  | -4.26018100 |



|   |             |             |             |
|---|-------------|-------------|-------------|
| F | -1.60169400 | 0.33896600  | -3.12406800 |
| F | 1.13164400  | 0.01086200  | 1.72902700  |
| F | 2.40769000  | -2.04562500 | 2.84271400  |
| F | 1.47566400  | -4.59132100 | 2.49806700  |
| F | -0.74868900 | -5.00974800 | 0.98747700  |
| F | -1.99366000 | -2.99733300 | -0.18232300 |
| O | 7.92819100  | 0.67333500  | -0.74643700 |
| C | 8.62629100  | 1.34310300  | -1.78646300 |
| H | 8.24355100  | 2.35969300  | -1.92721100 |
| H | 9.66710400  | 1.38770900  | -1.46647700 |
| H | 8.55654200  | 0.78853000  | -2.72850100 |

**1•B(C<sub>6</sub>F<sub>5</sub>)<sub>3</sub> (R = Me, R' = OMe)**

E(SMD/M06-2X/6-31G(d)) = -2854.280338 au

H(SMD/M06-2X/6-31G(d)) = -2853.889169 au

G(SMD/M06-2X/6-31G(d)) = -2854.011386 au

E(SMD/M06-2X/def2-TZVP//SMD/M06-2X /6-31G(d)) = -2855.497495 au

|   |             |             |             |
|---|-------------|-------------|-------------|
| C | 2.68763200  | -0.19226800 | -1.00488900 |
| N | 2.38759500  | -1.47255700 | -1.26672500 |
| N | 2.16430700  | -2.55000400 | -1.45352100 |
| C | 4.09861900  | 0.22703300  | -1.14528400 |
| C | 5.13103700  | -0.53816000 | -0.59320200 |
| C | 4.40317100  | 1.39427200  | -1.84939200 |
| C | 6.45056100  | -0.13554900 | -0.74952700 |
| H | 4.89789200  | -1.44507500 | -0.04072000 |
| C | 5.72849100  | 1.79972100  | -1.97696100 |
| H | 3.60581800  | 1.98033600  | -2.29952300 |
| C | 6.77068200  | 1.04277800  | -1.43525100 |
| H | 7.24805500  | -0.73898700 | -0.32368400 |
| H | 5.95715800  | 2.71180800  | -2.52153200 |
| C | 1.53389100  | 0.57902300  | -0.70806800 |
| O | 0.39145100  | 0.12054000  | -1.03640000 |
| O | 1.58658500  | 1.75149700  | -0.14365600 |
| C | 2.65043400  | 2.14018800  | 0.75231800  |
| H | 3.16108700  | 1.26274800  | 1.14833900  |
| H | 3.34603700  | 2.79116400  | 0.22296500  |
| H | 2.15263500  | 2.68432500  | 1.55503100  |
| B | -0.83888800 | -0.09947700 | -0.09873000 |
| C | -1.09307100 | 1.17732100  | 0.88035200  |
| C | -1.17777000 | 2.44737700  | 0.31535100  |
| C | -1.35261300 | 1.12050700  | 2.24289300  |
| C | -1.45790500 | 3.59400400  | 1.04009600  |
| C | -1.64518500 | 2.24453400  | 3.00811500  |
| C | -1.69622800 | 3.48869700  | 2.40349800  |
| C | -0.38298800 | -1.48342700 | 0.64973400  |
| C | -0.81919600 | -2.76623400 | 0.33946300  |
| C | 0.69213800  | -1.43810100 | 1.53481700  |
| C | -0.23781200 | -3.91706500 | 0.86387800  |
| C | 1.30883900  | -2.55360300 | 2.07598900  |
| C | 0.83448700  | -3.81199700 | 1.73332100  |
| C | -2.14535700 | -0.21915000 | -1.05296100 |

|   |             |             |             |
|---|-------------|-------------|-------------|
| C | -3.33547700 | -0.65015300 | -0.47457200 |
| C | -2.24596300 | 0.19102500  | -2.37585600 |
| C | -4.54429500 | -0.70789600 | -1.14552500 |
| C | -3.44172000 | 0.15057800  | -3.08775200 |
| C | -4.59534400 | -0.30075800 | -2.47179400 |
| F | -1.32739500 | -0.04670600 | 2.90337800  |
| F | -1.87895600 | 2.13226400  | 4.31810100  |
| F | -1.97197800 | 4.57627300  | 3.12172100  |
| F | -1.51104400 | 4.78878900  | 0.44604500  |
| F | -0.96794000 | 2.59573200  | -1.00162200 |
| F | -3.32540600 | -1.04823900 | 0.80945000  |
| F | -5.65102700 | -1.14281100 | -0.53856400 |
| F | -5.74592300 | -0.34245500 | -3.14275600 |
| F | -3.48315700 | 0.55165700  | -4.36133400 |
| F | -1.18586000 | 0.65907900  | -3.04858500 |
| F | 1.21410900  | -0.24070600 | 1.87659100  |
| F | 2.34467700  | -2.43294400 | 2.90763500  |
| F | 1.40433200  | -4.90427300 | 2.23579800  |
| F | -0.70030600 | -5.12117000 | 0.52636100  |
| F | -1.83004700 | -2.97184700 | -0.51578100 |
| C | 8.20481300  | 1.48075900  | -1.56914600 |
| H | 8.59384600  | 1.83132700  | -0.60660400 |
| H | 8.83993800  | 0.65096200  | -1.89410700 |
| H | 8.30444800  | 2.29588100  | -2.29015100 |

**1•B(C<sub>6</sub>F<sub>5</sub>)<sub>3</sub> (R = F, R' = OMe)**

E(SMD/M06-2X/6-31G(d)) = -2914.186525 au

H(SMD/M06-2X/6-31G(d)) = -2913.832366 au

G(SMD/M06-2X/6-31G(d)) = -2913.951272 au

E(SMD/M06-2X/def2-TZVP//SMD/M06-2X/6-31G(d)) = -2915.436825 au

|   |             |             |             |
|---|-------------|-------------|-------------|
| C | 2.54364300  | -0.15083100 | -1.25593800 |
| N | 2.25208700  | -1.45635400 | -1.39750500 |
| N | 2.05336700  | -2.54798100 | -1.50476900 |
| C | 3.98759600  | 0.19700800  | -1.29812000 |
| C | 4.80822400  | -0.14233000 | -0.21697900 |
| C | 4.52420800  | 0.84598100  | -2.41362600 |
| C | 6.16178400  | 0.16860800  | -0.24316600 |
| H | 4.37763000  | -0.63585800 | 0.65068100  |
| C | 5.87459700  | 1.17623100  | -2.44442400 |
| H | 3.88252700  | 1.09857000  | -3.25225000 |
| C | 6.66359100  | 0.82550900  | -1.35847100 |
| H | 6.82260500  | -0.07885500 | 0.58016600  |
| H | 6.31955400  | 1.68658500  | -3.29142900 |
| C | 1.38101500  | 0.63051400  | -1.05201600 |
| O | 0.23951300  | 0.07955400  | -1.22471000 |
| O | 1.38544300  | 1.88896700  | -0.72306400 |
| C | 2.52223700  | 2.55488300  | -0.13560700 |
| H | 2.98965400  | 1.91228500  | 0.61011200  |
| H | 3.23245400  | 2.84222900  | -0.91093400 |
| H | 2.10094400  | 3.44032500  | 0.33840500  |
| B | -0.84882000 | -0.10630600 | -0.11802900 |

|   |             |             |             |
|---|-------------|-------------|-------------|
| C | -1.10722200 | 1.27966900  | 0.69950700  |
| C | -1.37710200 | 2.43998200  | -0.02231200 |
| C | -1.19613500 | 1.41011700  | 2.07878100  |
| C | -1.67655800 | 3.65825800  | 0.56517400  |
| C | -1.49931200 | 2.61162900  | 2.71035400  |
| C | -1.74049300 | 3.74227900  | 1.94912100  |
| C | -0.19374100 | -1.32771600 | 0.75941100  |
| C | -0.55609600 | -2.66851300 | 0.69279200  |
| C | 0.97261300  | -1.08419600 | 1.48225400  |
| C | 0.17913500  | -3.68969200 | 1.28800300  |
| C | 1.74746700  | -2.06715100 | 2.07486700  |
| C | 1.34414000  | -3.39092600 | 1.97445900  |
| C | -2.23935600 | -0.46139900 | -0.87552600 |
| C | -3.31606500 | -0.86951500 | -0.09378900 |
| C | -2.52442000 | -0.27692600 | -2.22197200 |
| C | -4.58481700 | -1.11181000 | -0.58995300 |
| C | -3.78646700 | -0.50864400 | -2.76287400 |
| C | -4.82097900 | -0.92749200 | -1.94552200 |
| F | -0.98352600 | 0.36153200  | 2.88817100  |
| F | -1.56365900 | 2.68177500  | 4.04241000  |
| F | -2.03245800 | 4.90116200  | 2.53791100  |
| F | -1.91239000 | 4.74220500  | -0.17839500 |
| F | -1.33974200 | 2.40515700  | -1.36292400 |
| F | -3.12566100 | -1.05604100 | 1.22389600  |
| F | -5.57442200 | -1.51360800 | 0.21114300  |
| F | -6.03305600 | -1.15056300 | -2.45245000 |
| F | -4.00652900 | -0.32140000 | -4.06720600 |
| F | -1.59231600 | 0.14420700  | -3.08725800 |
| F | 1.42985800  | 0.18125000  | 1.59477400  |
| F | 2.87971700  | -1.75622300 | 2.71120200  |
| F | 2.06626200  | -4.35876600 | 2.53219400  |
| F | -0.22130000 | -4.95720500 | 1.18626800  |
| F | -1.64335900 | -3.06486800 | 0.01743900  |
| F | 7.96724900  | 1.13552800  | -1.38640700 |

**1•B(C<sub>6</sub>F<sub>5</sub>)<sub>3</sub> (R = H, R' = OMe)**

E(SMD/M06-2X/6-31G(d)) = -2814.982365 au

H(SMD/M06-2X/6-31G(d)) = -2814.620677 au

G(SMD/M06-2X/6-31G(d)) = -2814.738177 au

E(SMD/M06-2X/def2-TZVP//SMD/M06-2X /6-31G(d)) = -2816.185699 au

|   |            |             |             |
|---|------------|-------------|-------------|
| C | 2.80723100 | 0.01245700  | -1.25144100 |
| N | 2.59659500 | -1.30086500 | -1.42183200 |
| N | 2.44758000 | -2.40065500 | -1.53696700 |
| C | 4.17472600 | 0.52617000  | -1.48608200 |
| C | 5.28374200 | -0.13585700 | -0.95068400 |
| C | 4.34960600 | 1.67942600  | -2.25741000 |
| C | 6.56309600 | 0.35499800  | -1.19030200 |
| H | 5.14257600 | -1.02677100 | -0.34367500 |
| C | 5.63135000 | 2.17760700  | -2.47189800 |
| H | 3.48589800 | 2.17969400  | -2.68767800 |
| C | 6.73798800 | 1.51473600  | -1.94411400 |

|   |             |             |             |
|---|-------------|-------------|-------------|
| H | 7.42289200  | -0.16256100 | -0.77699100 |
| H | 5.76456000  | 3.07705900  | -3.06457600 |
| C | 1.61393500  | 0.70818000  | -0.92699900 |
| O | 0.49560400  | 0.13869600  | -1.14769600 |
| O | 1.60200900  | 1.91636000  | -0.44120500 |
| C | 2.67217600  | 2.44429200  | 0.37298700  |
| H | 3.27780500  | 1.63725800  | 0.78441200  |
| H | 3.27862300  | 3.12203500  | -0.22737900 |
| H | 2.16998300  | 2.98762500  | 1.17364800  |
| B | -0.63807700 | -0.12170100 | -0.10275500 |
| C | -0.92718000 | 1.18998600  | 0.81968500  |
| C | -1.16767900 | 2.40928100  | 0.19112500  |
| C | -1.07660900 | 1.20014500  | 2.19987000  |
| C | -1.49396100 | 3.57268100  | 0.86839600  |
| C | -1.40966400 | 2.34279700  | 2.91978000  |
| C | -1.61830100 | 3.53620200  | 2.25040900  |
| C | -0.01191500 | -1.41359900 | 0.68633400  |
| C | -0.36491200 | -2.74402200 | 0.49274500  |
| C | 1.11780200  | -1.22662100 | 1.48007900  |
| C | 0.34241400  | -3.80855400 | 1.04406700  |
| C | 1.85877000  | -2.25190000 | 2.04318700  |
| C | 1.46276700  | -3.56309000 | 1.81976400  |
| C | -1.99872600 | -0.40674500 | -0.93850700 |
| C | -3.10052500 | -0.88623000 | -0.23654500 |
| C | -2.23581000 | -0.09846400 | -2.27152400 |
| C | -4.34924000 | -1.08398300 | -0.79871300 |
| C | -3.47636300 | -0.28093900 | -2.87686500 |
| C | -4.53740200 | -0.77515700 | -2.13906900 |
| F | -0.89860600 | 0.08489900  | 2.92352700  |
| F | -1.53243400 | 2.29610700  | 4.24863900  |
| F | -1.93617900 | 4.64018700  | 2.92469900  |
| F | -1.69777100 | 4.71751400  | 0.21205300  |
| F | -1.07173900 | 2.48977700  | -1.14480000 |
| F | -2.95673600 | -1.19167500 | 1.06467400  |
| F | -5.36511400 | -1.55950400 | -0.07468400 |
| F | -5.72956700 | -0.95235300 | -2.70753300 |
| F | -3.65072200 | 0.02680800  | -4.16500600 |
| F | -1.27408900 | 0.40301700  | -3.05847100 |
| F | 1.56388200  | 0.02774600  | 1.70612600  |
| F | 2.93922200  | -1.99561900 | 2.78214100  |
| F | 2.15260600  | -4.57170500 | 2.34615000  |
| F | -0.04593500 | -5.06457000 | 0.82181000  |
| F | -1.41491800 | -3.08386900 | -0.26705500 |
| H | 7.73694700  | 1.90073000  | -2.12126100 |

**1**•B(C<sub>6</sub>F<sub>5</sub>)<sub>3</sub> (R = Cl, R' = OMe)

E(SMD/M06-2X/6-31G(d)) = -3274.552192 au

H(SMD/M06-2X/6-31G(d)) = -3274.199208 au

G(SMD/M06-2X/6-31G(d)) = -3274.32033 au

E(SMD/M06-2X/def2-TZVP//SMD/M06-2X/6-31G(d)) = -3275.78925 au

|   |            |             |             |
|---|------------|-------------|-------------|
| C | 2.54802600 | -0.32792200 | -0.84189900 |
|---|------------|-------------|-------------|

|   |             |             |             |
|---|-------------|-------------|-------------|
| N | 2.19700800  | -1.57591200 | -1.17881900 |
| N | 1.91801700  | -2.62769400 | -1.42704000 |
| C | 3.97626500  | 0.03677100  | -0.92096400 |
| C | 4.96752400  | -0.85273500 | -0.49727100 |
| C | 4.33554500  | 1.28214700  | -1.44577000 |
| C | 6.30922000  | -0.50450600 | -0.59575200 |
| H | 4.69498000  | -1.82030500 | -0.08424900 |
| C | 5.67419100  | 1.64770500  | -1.52503600 |
| H | 3.56993300  | 1.96723600  | -1.80019300 |
| C | 6.64633600  | 0.74674200  | -1.10242600 |
| H | 7.08213100  | -1.19247200 | -0.27088400 |
| H | 5.95760100  | 2.61436700  | -1.92691300 |
| C | 1.42021100  | 0.48135900  | -0.53284900 |
| O | 0.27696300  | 0.10789300  | -0.94380100 |
| O | 1.51069500  | 1.60171500  | 0.12400900  |
| C | 2.53156700  | 1.84288300  | 1.11826900  |
| B | -1.02809700 | -0.08200400 | -0.10097300 |
| C | -1.24974600 | 1.13959700  | 0.95255200  |
| C | -1.22040000 | 2.44679700  | 0.47285800  |
| C | -1.57847700 | 1.01175700  | 2.29513400  |
| C | -1.46063900 | 3.56031300  | 1.26054000  |
| C | -1.83436200 | 2.10125200  | 3.12135100  |
| C | -1.77378600 | 3.38249300  | 2.60122400  |
| C | -0.71948300 | -1.54583500 | 0.56454600  |
| C | -1.24149500 | -2.76585400 | 0.15115500  |
| C | 0.30652500  | -1.64550900 | 1.50174600  |
| C | -0.78981100 | -3.99091100 | 0.63387500  |
| C | 0.79350900  | -2.83873800 | 2.00711400  |
| C | 0.23471800  | -4.02940000 | 1.56403500  |
| C | -2.27249000 | -0.03577700 | -1.14030500 |
| C | -3.52742500 | -0.40608500 | -0.66653800 |
| C | -2.25311400 | 0.46066100  | -2.43694700 |
| C | -4.68942900 | -0.32884700 | -1.41389400 |
| C | -3.39812400 | 0.55685800  | -3.22311600 |
| C | -4.62083200 | 0.16050400  | -2.71125200 |
| F | -1.66113100 | -0.19485600 | 2.87490100  |
| F | -2.13980400 | 1.92036200  | 4.40845500  |
| F | -2.01330000 | 4.43718800  | 3.37877600  |
| F | -1.40211400 | 4.79224800  | 0.74904100  |
| F | -0.92781600 | 2.66520700  | -0.81848100 |
| F | -3.63264300 | -0.88177800 | 0.58637100  |
| F | -5.86344600 | -0.71149000 | -0.90658900 |
| F | -5.72352700 | 0.24989600  | -3.45398400 |
| F | -3.32445800 | 1.03721400  | -4.46739500 |
| F | -1.11831200 | 0.88542400  | -3.00928400 |
| F | 0.90680800  | -0.51861100 | 1.94242700  |
| F | 1.78513600  | -2.85611200 | 2.89889900  |
| F | 0.67939300  | -5.19353100 | 2.02985600  |
| F | -1.33153800 | -5.12875100 | 0.19862300  |
| F | -2.21490000 | -2.83411300 | -0.76681400 |

|    |            |            |             |
|----|------------|------------|-------------|
| H  | 3.27924300 | 2.51998800 | 0.70551300  |
| H  | 2.00638500 | 2.31467700 | 1.94880900  |
| H  | 2.98655400 | 0.90622200 | 1.44002900  |
| Cl | 8.32988000 | 1.19527500 | -1.21490600 |

**1•B(C<sub>6</sub>F<sub>5</sub>)<sub>3</sub> (R = CF<sub>3</sub>, R' = OMe)**

E(SMD/M06-2X/6-31G(d)) = -3151.918829 au

H(SMD/M06-2X/6-31G(d)) = -3151.548585 au

G(SMD/M06-2X/6-31G(d)) = -3151.675371 au

E(SMD/M06-2X/def2-TZVP//SMD/M06-2X/6-31G(d)) = -3153.276646 au

|   |             |             |             |
|---|-------------|-------------|-------------|
| C | 2.18087200  | -0.47184700 | -0.72952300 |
| N | 1.77837400  | -1.69055200 | -1.11432900 |
| N | 1.45374200  | -2.71752900 | -1.40580500 |
| C | 3.62922500  | -0.18495400 | -0.73535400 |
| C | 4.55075700  | -1.14778200 | -0.31599700 |
| C | 4.07317100  | 1.06364200  | -1.18846400 |
| C | 5.91195500  | -0.86606600 | -0.34781600 |
| H | 4.20848000  | -2.11541000 | 0.04032000  |
| C | 5.43060600  | 1.35066900  | -1.19841800 |
| H | 3.35793200  | 1.80058900  | -1.54300600 |
| C | 6.34418600  | 0.38284100  | -0.78182800 |
| H | 6.62878600  | -1.61358700 | -0.02656200 |
| H | 5.78010900  | 2.31765300  | -1.54762900 |
| C | 1.08448600  | 0.38957300  | -0.44552100 |
| O | -0.05907400 | 0.08215300  | -0.90620500 |
| O | 1.20501900  | 1.49132700  | 0.23688400  |
| C | 2.19056300  | 1.66482900  | 1.27999900  |
| B | -1.40043200 | -0.06611800 | -0.11092600 |
| C | -1.60354100 | 1.14078200  | 0.96271100  |
| C | -1.49666700 | 2.45575600  | 0.51669600  |
| C | -1.99118900 | 0.99745200  | 2.28799100  |
| C | -1.71801500 | 3.56085700  | 1.32162800  |
| C | -2.23020100 | 2.07834500  | 3.13034300  |
| C | -2.09198800 | 3.36700300  | 2.64435000  |
| C | -1.18066600 | -1.55590500 | 0.53150400  |
| C | -1.74071900 | -2.74170000 | 0.07093600  |
| C | -0.19570100 | -1.72208600 | 1.50281200  |
| C | -1.35976500 | -3.99609700 | 0.53893600  |
| C | 0.22140300  | -2.94694800 | 1.99503400  |
| C | -0.37214200 | -4.10118100 | 1.50343100  |
| C | -2.60533700 | 0.05914500  | -1.18907400 |
| C | -3.89055500 | -0.26023100 | -0.76157400 |
| C | -2.52156900 | 0.57806400  | -2.47432200 |
| C | -5.02342700 | -0.11350100 | -1.54229000 |
| C | -3.63556800 | 0.74408900  | -3.29280100 |
| C | -4.89093300 | 0.39641500  | -2.82669900 |
| F | -2.15195800 | -0.21701700 | 2.83380500  |
| F | -2.59367200 | 1.88234500  | 4.40000800  |
| F | -2.31489400 | 4.41357700  | 3.43761200  |
| F | -1.58511300 | 4.80012200  | 0.84289900  |
| F | -1.14547900 | 2.68972800  | -0.75716200 |

|   |             |             |             |
|---|-------------|-------------|-------------|
| F | -4.05674900 | -0.75407200 | 0.47757100  |
| F | -6.22958700 | -0.44982300 | -1.07970300 |
| F | -5.96427800 | 0.55141400  | -3.60077700 |
| F | -3.50060000 | 1.24398100  | -4.52412500 |
| F | -1.35016900 | 0.95749700  | -3.00322900 |
| F | 0.43740700  | -0.63326300 | 1.99063500  |
| F | 1.17817400  | -3.02831300 | 2.92055500  |
| F | 0.00410100  | -5.29440000 | 1.95559800  |
| F | -1.93426800 | -5.09883400 | 0.05788100  |
| F | -2.68328300 | -2.74523400 | -0.88101600 |
| C | 7.80480300  | 0.72932400  | -0.79457200 |
| F | 8.10313400  | 1.64923600  | 0.13889900  |
| F | 8.17697900  | 1.25085800  | -1.97465800 |
| F | 8.58429200  | -0.33493300 | -0.56347200 |
| H | 2.97445000  | 2.33072900  | 0.91965500  |
| H | 1.64704700  | 2.12659800  | 2.10443900  |
| H | 2.60236600  | 0.70398700  | 1.58831000  |

**1•B(C<sub>6</sub>F<sub>5</sub>)<sub>3</sub> (R = CN, R' = OMe)**

E(SMD/M06-2X/6-31G(d)) = -2907.198252 au

H(SMD/M06-2X/6-31G(d)) = -2906.836308 au

G(SMD/M06-2X/6-31G(d)) = -2906.958267 au

E(SMD/M06-2X/def2-TZVP//SMD/M06-2X /6-31G(d)) = -2908.436227 au

|   |             |             |             |
|---|-------------|-------------|-------------|
| C | 2.63202700  | -0.29306300 | -0.87601000 |
| N | 2.29443400  | -1.55101300 | -1.18970200 |
| N | 2.02290600  | -2.60753300 | -1.42393200 |
| C | 4.05264100  | 0.08763300  | -0.97763400 |
| C | 5.06032300  | -0.81471500 | -0.61966000 |
| C | 4.38484500  | 1.35914000  | -1.46008800 |
| C | 6.39311100  | -0.45098900 | -0.74046700 |
| H | 4.80351700  | -1.79888600 | -0.23791000 |
| C | 5.71593200  | 1.73588400  | -1.56272500 |
| H | 3.60349900  | 2.04818300  | -1.76807300 |
| C | 6.71902000  | 0.82796300  | -1.20553000 |
| H | 7.17904300  | -1.14576700 | -0.46550100 |
| H | 5.98026300  | 2.72010400  | -1.93387900 |
| C | 1.49524700  | 0.50509500  | -0.55898300 |
| O | 0.35543600  | 0.11120000  | -0.95426300 |
| O | 1.57876800  | 1.62893800  | 0.09128600  |
| C | 2.59494600  | 1.88656400  | 1.08700600  |
| H | 3.09310700  | 0.96301800  | 1.38151400  |
| H | 3.30820000  | 2.60653200  | 0.68628900  |
| H | 2.05659200  | 2.31377400  | 1.93319500  |
| B | -0.94634200 | -0.08432700 | -0.10147000 |
| C | -1.16506200 | 1.13637900  | 0.95285100  |
| C | -1.15047300 | 2.44339400  | 0.47184900  |

|   |             |             |             |
|---|-------------|-------------|-------------|
| C | -1.47877700 | 1.00708400  | 2.29893000  |
| C | -1.39019100 | 3.55576600  | 1.26123900  |
| C | -1.73389300 | 2.09538800  | 3.12694400  |
| C | -1.68802400 | 3.37663700  | 2.60529000  |
| C | -0.62275900 | -1.54543800 | 0.56151500  |
| C | -1.14567200 | -2.76866400 | 0.15896500  |
| C | 0.41409600  | -1.63795400 | 1.48745600  |
| C | -0.68515800 | -3.99016900 | 0.64252700  |
| C | 0.90965300  | -2.82722300 | 1.99351300  |
| C | 0.34911100  | -4.02144700 | 1.56207600  |
| C | -2.19681800 | -0.04569200 | -1.13269900 |
| C | -3.44669400 | -0.42043000 | -0.64922700 |
| C | -2.18828400 | 0.44791500  | -2.43042800 |
| C | -4.61403700 | -0.35014800 | -1.38883600 |
| C | -3.33893700 | 0.53712900  | -3.20904100 |
| C | -4.55634300 | 0.13648200  | -2.68780700 |
| F | -1.54678800 | -0.19956800 | 2.88028100  |
| F | -2.02471000 | 1.91326400  | 4.41713000  |
| F | -1.92677500 | 4.43001500  | 3.38459100  |
| F | -1.34573200 | 4.78760900  | 0.74839100  |
| F | -0.87249800 | 2.66240500  | -0.82262100 |
| F | -3.54069500 | -0.89336600 | 0.60557200  |
| F | -5.78278400 | -0.73669200 | -0.87266600 |
| F | -5.66436100 | 0.21908800  | -3.42319200 |
| F | -3.27586200 | 1.01484100  | -4.45483000 |
| F | -1.05893000 | 0.87665500  | -3.01058700 |
| F | 1.01637200  | -0.50681900 | 1.91503300  |
| F | 1.91111000  | -2.83769400 | 2.87423000  |
| F | 0.80201200  | -5.18204800 | 2.02832100  |
| F | -1.22787000 | -5.13140600 | 0.21798200  |
| F | -2.12851000 | -2.84380600 | -0.74808500 |
| C | 8.10058800  | 1.21185500  | -1.32072300 |
| N | 9.21202100  | 1.52069300  | -1.41239900 |

**1•B(C<sub>6</sub>F<sub>5</sub>)<sub>3</sub> (R = NO<sub>2</sub>, R' = OMe)**

E(SMD/M06-2X/6-31G(d)) = -3019.408439 au

H(SMD/M06-2X/6-31G(d)) = -3019.041354 au

G(SMD/M06-2X/6-31G(d)) = -3019.164564 au

E(SMD/M06-2X/def2-TZVP//SMD/M06-2X/6-31G(d)) = -3020.700948 au

|   |            |             |             |
|---|------------|-------------|-------------|
| C | 2.43538300 | -0.39742000 | -0.74539700 |
| N | 2.05759300 | -1.62437100 | -1.12841300 |
| N | 1.74351400 | -2.65515600 | -1.41696700 |
| C | 3.86818600 | -0.06146300 | -0.79508300 |



|   |             |             |             |
|---|-------------|-------------|-------------|
| C | 4.84067200  | -1.03391300 | -0.53180200 |
| C | 4.24957200  | 1.24253100  | -1.13850200 |
| C | 6.18707400  | -0.70782500 | -0.60309000 |
| H | 4.55014800  | -2.04518300 | -0.26210500 |
| C | 5.59360000  | 1.58206200  | -1.19176500 |
| H | 3.49722100  | 1.98805300  | -1.37847300 |
| C | 6.53633600  | 0.59787000  | -0.92378700 |
| H | 6.95388700  | -1.44567600 | -0.40193900 |
| H | 5.90776900  | 2.58512000  | -1.45335300 |
| C | 1.31670400  | 0.42661500  | -0.42229000 |
| O | 0.18143100  | 0.09835800  | -0.88148700 |
| O | 1.41757200  | 1.50735400  | 0.29464600  |
| C | 2.39246500  | 1.65840600  | 1.35231200  |
| H | 2.83781600  | 0.69740100  | 1.60916000  |
| H | 3.15244600  | 2.37068300  | 1.03278300  |
| H | 1.83017300  | 2.05448900  | 2.19808600  |
| B | -1.16944900 | -0.07306100 | -0.10194400 |
| C | -1.39027800 | 1.11353200  | 0.98925700  |
| C | -1.29312700 | 2.43629700  | 0.56472800  |
| C | -1.78278000 | 0.94508300  | 2.31003400  |
| C | -1.52903200 | 3.52641200  | 1.38557600  |
| C | -2.03682500 | 2.01030700  | 3.16785400  |
| C | -1.90863000 | 3.30779600  | 2.70288800  |
| C | -0.94043200 | -1.57186700 | 0.51384200  |
| C | -1.49138600 | -2.75416700 | 0.03383100  |
| C | 0.04173800  | -1.74578900 | 1.48650600  |
| C | -1.10693400 | -4.01259400 | 0.48818800  |
| C | 0.46130700  | -2.97446300 | 1.96635200  |
| C | -0.12411100 | -4.12505000 | 1.45659100  |
| C | -2.36213100 | 0.06031200  | -1.19173700 |
| C | -3.64968100 | -0.27297600 | -0.78241500 |
| C | -2.26729100 | 0.59620800  | -2.46910300 |
| C | -4.77464400 | -0.12373300 | -1.57392500 |
| C | -3.37296800 | 0.76478200  | -3.29816800 |
| C | -4.63107500 | 0.40302500  | -2.85037300 |
| F | -1.93311600 | -0.27950100 | 2.83542500  |
| F | -2.40482100 | 1.79099000  | 4.43225100  |
| F | -2.14629400 | 4.33923700  | 3.51132900  |
| F | -1.40426000 | 4.77417100  | 0.92749400  |
| F | -0.93461000 | 2.69267500  | -0.70295800 |
| F | -3.82550800 | -0.78394600 | 0.44835100  |

|   |             |             |             |
|---|-------------|-------------|-------------|
| F | -5.98362400 | -0.47333100 | -1.12916300 |
| F | -5.69664100 | 0.56059400  | -3.63440800 |
| F | -3.22769700 | 1.28081200  | -4.52153300 |
| F | -1.09223800 | 0.99042500  | -2.97900200 |
| F | 0.66760700  | -0.65943000 | 1.98925000  |
| F | 1.41320300  | -3.06311800 | 2.89610100  |
| F | 0.25509800  | -5.32204200 | 1.89585500  |
| F | -1.67294400 | -5.11181100 | -0.01047100 |
| F | -2.42934800 | -2.74978900 | -0.92244700 |
| N | 7.95910100  | 0.95073000  | -0.98587600 |
| O | 8.24797500  | 2.10319600  | -1.25557900 |
| O | 8.77337100  | 0.07218100  | -0.76300900 |

1•B(C<sub>6</sub>F<sub>5</sub>)<sub>3</sub> (R = NMe<sub>2</sub>, R' = OMe), B←NMe<sub>2</sub>

E(SMD/M06-2X/6-31G(d)) = -2948.884061 au

H(SMD/M06-2X/6-31G(d)) = -2948.442029 au

G(SMD/M06-2X/6-31G(d)) = -2948.564472 au

E(SMD/M06-2X/def2-TZVP//SMD/M06-2X /6-31G(d)) = -2950.131856 au

|   |             |             |             |
|---|-------------|-------------|-------------|
| C | -5.35683400 | 0.06752000  | -1.14399300 |
| N | -6.20733800 | -0.79411000 | -1.65725500 |
| N | -6.94183400 | -1.52378000 | -2.09890300 |
| C | -3.92743300 | -0.07292300 | -1.47548000 |
| C | -3.36000900 | -1.33740900 | -1.66215800 |
| C | -3.10122400 | 1.05007100  | -1.57794700 |
| C | -1.99727900 | -1.48399700 | -1.88698000 |
| H | -3.97947700 | -2.22804800 | -1.59680100 |
| C | -1.73650900 | 0.90672800  | -1.79030300 |
| H | -3.51822900 | 2.04293900  | -1.45714900 |
| C | -1.17033900 | -0.35992000 | -1.91156400 |
| H | -1.60375200 | -2.48717200 | -1.98494600 |
| H | -1.11623000 | 1.79608000  | -1.80006300 |
| C | -5.96587400 | 0.92439600  | -0.12137100 |
| O | -7.14380300 | 0.89952800  | 0.17191900  |
| O | -5.05830700 | 1.71386100  | 0.45841000  |
| B | 1.06229900  | -0.18405200 | -0.45954400 |
| C | 2.56690300  | -0.86797700 | -0.32340800 |
| C | 3.58135700  | -0.94547700 | -1.27569800 |
| C | 3.00413900  | -1.21614400 | 0.96128200  |
| C | 4.87643200  | -1.38118400 | -1.01511700 |
| C | 4.28347600  | -1.65072000 | 1.26924300  |
| C | 5.23772700  | -1.73786400 | 0.26926200  |
| C | -0.06832900 | -0.88606700 | 0.51958000  |
| C | -1.19571800 | -0.21103300 | 0.99978200  |
| C | -0.07600500 | -2.24807500 | 0.81005900  |
| C | -2.25879000 | -0.82454800 | 1.64463600  |
| C | -1.11278900 | -2.90568000 | 1.46082500  |
| C | -2.22121700 | -2.19000300 | 1.87664900  |

|   |             |             |             |
|---|-------------|-------------|-------------|
| C | 1.38056800  | 1.39277700  | -0.07618800 |
| C | 1.21335900  | 1.89765200  | 1.22098000  |
| C | 2.11993500  | 2.25300400  | -0.89160600 |
| C | 1.59289400  | 3.17409500  | 1.61673200  |
| C | 2.50921200  | 3.53952300  | -0.54353400 |
| C | 2.23163100  | 4.01615700  | 0.72422800  |
| F | 2.17394900  | -1.12817500 | 2.01147600  |
| F | 4.60258500  | -1.97230700 | 2.52382800  |
| F | 6.47264400  | -2.15118600 | 0.54120600  |
| F | 5.77182200  | -1.44144700 | -2.00246000 |
| F | 3.37305800  | -0.61487000 | -2.56451400 |
| F | 0.70810900  | 1.15267300  | 2.21294600  |
| F | 1.36713900  | 3.58045700  | 2.86742700  |
| F | 2.60383400  | 5.23979900  | 1.08916900  |
| F | 3.18672300  | 4.29439600  | -1.41060200 |
| F | 2.56792900  | 1.84420600  | -2.08901900 |
| F | 0.94914200  | -3.03911500 | 0.44059900  |
| F | -1.04246200 | -4.21917600 | 1.68697800  |
| F | -3.22914800 | -2.80032800 | 2.49514200  |
| F | -3.31665300 | -0.11050700 | 2.03558500  |
| F | -1.33700100 | 1.11194900  | 0.82961400  |
| C | -5.53717400 | 2.49053700  | 1.56068000  |
| H | -6.32098000 | 3.17706300  | 1.23391800  |
| H | -5.92603900 | 1.83557100  | 2.34349500  |
| H | -4.67249800 | 3.04388300  | 1.92414800  |
| N | 0.30969500  | -0.47472300 | -2.03971600 |
| C | 0.66788300  | 0.39070100  | -3.22025900 |
| H | 1.70995300  | 0.24550000  | -3.47360000 |
| H | 0.03256500  | 0.08064800  | -4.05294200 |
| H | 0.48745600  | 1.43660300  | -2.99350700 |
| C | 0.67375800  | -1.86788400 | -2.45513400 |
| H | 0.49180500  | -2.57346800 | -1.64914700 |
| H | 0.08458800  | -2.13984800 | -3.33316300 |
| H | 1.72502200  | -1.88314100 | -2.71961100 |

**1•B(C<sub>6</sub>F<sub>5</sub>)<sub>3</sub> (R = OMe, R' = OMe), B←OMe**

E(SMD/M06-2X/6-31G(d)) = -2929.455907 au

H(SMD/M06-2X/6-31G(d)) = -2929.058051 au

G(SMD/M06-2X/6-31G(d)) = -2929.181297 au

E(SMD/M06-2X/def2-TZVP//SMD/M06-2X /6-31G(d)) = -2930.704369 au

|   |            |             |             |
|---|------------|-------------|-------------|
| C | 5.62084900 | 0.97977600  | -0.82456600 |
| N | 6.04701100 | 2.21881400  | -0.67672200 |
| N | 6.41834400 | 3.27249200  | -0.55125400 |
| C | 4.16877200 | 0.77101800  | -0.94780100 |
| C | 3.28055600 | 1.76354500  | -0.50980400 |
| C | 3.64514700 | -0.39575100 | -1.52779700 |
| C | 1.90523200 | 1.60335700  | -0.63766800 |
| H | 3.65620400 | 2.67724400  | -0.05831200 |

|   |             |             |             |
|---|-------------|-------------|-------------|
| C | 2.27307200  | -0.57176700 | -1.64014500 |
| H | 4.30926900  | -1.16828100 | -1.89202800 |
| C | 1.42449200  | 0.42523700  | -1.18089300 |
| H | 1.22823400  | 2.37914300  | -0.30554800 |
| H | 1.86152500  | -1.47353900 | -2.07898700 |
| C | 6.73559600  | 0.02583200  | -0.76989600 |
| O | 7.89798800  | 0.36318500  | -0.67519700 |
| O | 6.32427200  | -1.24361500 | -0.81958200 |
| B | -1.12197500 | 0.06868000  | -0.21843200 |
| C | -1.94616600 | -1.28440100 | -0.59979000 |
| C | -1.57461200 | -2.28838400 | -1.48387900 |
| C | -3.09585300 | -1.54993700 | 0.13996000  |
| C | -2.30398200 | -3.46188500 | -1.64913200 |
| C | -3.85039800 | -2.70250300 | 0.00988000  |
| C | -3.44729800 | -3.67140300 | -0.89881600 |
| C | -1.98774100 | 1.44812600  | -0.33328300 |
| C | -1.56452900 | 2.64681300  | 0.23926400  |
| C | -3.16832900 | 1.55868100  | -1.06713700 |
| C | -2.24787700 | 3.84800900  | 0.12949400  |
| C | -3.88776800 | 2.73929300  | -1.20398800 |
| C | -3.42680700 | 3.89447600  | -0.59721500 |
| C | -0.41105200 | -0.24360300 | 1.20651400  |
| C | -0.78172900 | 0.30234700  | 2.43353300  |
| C | 0.49823100  | -1.29772800 | 1.29526800  |
| C | -0.21508500 | -0.08808400 | 3.64102400  |
| C | 1.09423900  | -1.71256900 | 2.47537100  |
| C | 0.73548400  | -1.09458100 | 3.66319700  |
| F | -3.51373500 | -0.64113700 | 1.03766400  |
| F | -4.94756600 | -2.89244800 | 0.74396800  |
| F | -4.15418600 | -4.79009700 | -1.04518400 |
| F | -1.90222000 | -4.38807900 | -2.52182900 |
| F | -0.47529000 | -2.17829900 | -2.25073100 |
| F | -1.74671300 | 1.22572400  | 2.52568100  |
| F | -0.60020500 | 0.48487300  | 4.78227000  |
| F | 1.28127400  | -1.47951500 | 4.81342600  |
| F | 1.97413000  | -2.71450100 | 2.48159200  |
| F | 0.81046200  | -1.99634800 | 0.19217100  |
| F | -3.67627500 | 0.50442300  | -1.72520700 |
| F | -5.01001800 | 2.76704500  | -1.92333800 |
| F | -4.09914500 | 5.03479400  | -0.71847500 |
| F | -1.78118800 | 4.95134600  | 0.71458600  |

|   |             |             |             |
|---|-------------|-------------|-------------|
| F | -0.42795600 | 2.69437200  | 0.95432100  |
| C | 7.36985600  | -2.22256400 | -0.75374500 |
| H | 8.05783300  | -2.10022300 | -1.59266100 |
| H | 7.91656900  | -2.12885400 | 0.18656600  |
| H | 6.86863400  | -3.18754400 | -0.80863100 |
| O | 0.02949000  | 0.23927500  | -1.35587900 |
| C | -0.43014200 | 0.59512800  | -2.69203600 |
| H | -0.38707400 | 1.68047800  | -2.79837300 |
| H | 0.22279600  | 0.10087000  | -3.40969600 |
| H | -1.45087600 | 0.22916300  | -2.79278500 |

**1'•BCl<sub>3</sub> (R = H, R' = OMe)**

E(SMD/M06-2X/6-31G(d)) = -2012.892679 au

H(SMD/M06-2X/6-31G(d)) = -2012.707705 au

G(SMD/M06-2X/6-31G(d)) = -2012.776251 au

E(SMD/M06-2X/def2-TZVP//SMD/M06-2X /6-31G(d)) = -2013.240995 au

|    |             |             |             |
|----|-------------|-------------|-------------|
| C  | -1.05143000 | 0.07877800  | 0.06247900  |
| N  | -0.43415100 | 1.97617900  | -0.16688600 |
| N  | -0.19086200 | 3.02897200  | 0.02903400  |
| C  | -2.45219600 | 0.09614800  | -0.03956700 |
| C  | -3.08326900 | -0.31170800 | -1.24038500 |
| C  | -3.23239100 | 0.48830200  | 1.07467300  |
| C  | -4.46521600 | -0.35087600 | -1.30803900 |
| H  | -2.46759400 | -0.59879500 | -2.08747400 |
| C  | -4.61233400 | 0.46530600  | 0.98745300  |
| H  | -2.72823700 | 0.80034400  | 1.98425600  |
| C  | -5.22147100 | 0.04300400  | -0.19965300 |
| H  | -4.96009900 | -0.67580000 | -2.21675100 |
| H  | -5.22049100 | 0.76395400  | 1.83424900  |
| C  | 0.11234800  | -0.54564700 | -0.26372300 |
| O  | 1.15168600  | 0.08937200  | -0.73457300 |
| O  | 0.27643100  | -1.83635200 | -0.03680400 |
| C  | -0.76344300 | -2.57659900 | 0.61875800  |
| H  | -1.03772100 | -2.08191500 | 1.55546500  |
| H  | -1.63352000 | -2.67332800 | -0.03480100 |
| H  | -0.33421300 | -3.55626600 | 0.81903700  |
| B  | 2.48077100  | 0.03065900  | -0.09770400 |
| H  | -6.30544400 | 0.02009800  | -0.26131700 |
| Cl | 2.27631400  | 0.00855200  | 1.76321500  |
| Cl | 3.33808800  | 1.59444300  | -0.62981500 |
| Cl | 3.43559900  | -1.45782200 | -0.66988000 |

**1'•BH<sub>3</sub> (R = H, R' = OMe)**

E(SMD/M06-2X/6-31G(d)) = -634.0092548 au

H(SMD/M06-2X/6-31G(d)) = -633.804804 au

G(SMD/M06-2X/6-31G(d)) = -633.862718 au

E(SMD/M06-2X/def2-TZVP//SMD/M06-2X /6-31G(d)) = -634.2580511 au

|   |            |            |            |
|---|------------|------------|------------|
| C | 0.38866400 | 0.33997000 | 0.60480900 |
|---|------------|------------|------------|

|   |             |             |             |
|---|-------------|-------------|-------------|
| N | 0.78470900  | 2.20673000  | 0.06727200  |
| N | 0.82103700  | 3.29194700  | 0.24069400  |
| C | -0.95587900 | 0.11599800  | 0.15571300  |
| C | -1.24470800 | -0.54324600 | -1.06041700 |
| C | -2.01808700 | 0.53231900  | 0.98583900  |
| C | -2.55901000 | -0.79774400 | -1.41946000 |
| H | -0.42664700 | -0.85445200 | -1.70562300 |
| C | -3.33171800 | 0.29400200  | 0.61282100  |
| H | -1.78244900 | 1.03706600  | 1.91809300  |
| C | -3.59727800 | -0.37386900 | -0.58524700 |
| H | -2.78223300 | -1.31488000 | -2.34671900 |
| H | -4.14921200 | 0.61517400  | 1.24953500  |
| C | 1.56078100  | -0.28034600 | 0.07831000  |
| O | 2.45309800  | 0.33246800  | -0.56740300 |
| O | 1.79655100  | -1.53199800 | 0.41642200  |
| C | 0.87369200  | -2.25213800 | 1.25305400  |
| H | 0.60767600  | -1.64978100 | 2.12609000  |
| H | -0.01968300 | -2.52606200 | 0.68884200  |
| H | 1.41035300  | -3.14781600 | 1.56040300  |
| B | 3.86206300  | -0.29056200 | -0.88564800 |
| H | -4.62647000 | -0.56740900 | -0.87286900 |
| H | 4.37264600  | -0.62256400 | 0.16536000  |
| H | 4.45887500  | 0.61611100  | -1.42645800 |
| H | 3.69068100  | -1.23675100 | -1.62884200 |

**1'•BF<sub>3</sub> (R = H, R' = OMe)**

E(SMD/M06-2X/6-31G(d)) = -931.8710157 au

H(SMD/M06-2X/6-31G(d)) = -931.682587 au

G(SMD/M06-2X/6-31G(d)) = -931.747222 au

E(SMD/M06-2X/def2-TZVP//SMD/M06-2X /6-31G(d)) = -932.2713155 au

|   |             |             |             |
|---|-------------|-------------|-------------|
| C | -0.50719100 | 0.36780100  | 0.63883100  |
| N | -0.13709000 | 2.26157000  | 0.15515300  |
| N | -0.16890500 | 3.34926500  | 0.31049700  |
| C | -1.81998100 | 0.11600400  | 0.14050500  |
| C | -2.03420200 | -0.52869400 | -1.09982500 |
| C | -2.92818200 | 0.48692500  | 0.93317900  |
| C | -3.32342300 | -0.81540400 | -1.51816800 |
| H | -1.17766500 | -0.80108400 | -1.71146900 |
| C | -4.21563400 | 0.21465800  | 0.50013600  |
| H | -2.74723000 | 0.98193500  | 1.88261700  |
| C | -4.40792000 | -0.43875900 | -0.72028600 |
| H | -3.49236900 | -1.32136600 | -2.46277400 |
| H | -5.06965600 | 0.49773900  | 1.10607500  |
| C | 0.72944000  | -0.19328100 | 0.26564100  |
| O | 1.67725000  | 0.47038600  | -0.26321400 |
| O | 0.98342700  | -1.43702800 | 0.61575200  |
| C | 0.00633200  | -2.21158500 | 1.33357300  |
| H | -0.37748200 | -1.63801700 | 2.18180300  |
| H | -0.80759100 | -2.50882900 | 0.66993800  |
| H | 0.54483400  | -3.09044300 | 1.68266500  |

|   |             |             |             |
|---|-------------|-------------|-------------|
| B | 3.13642500  | -0.05966000 | -0.32931200 |
| H | -5.41759200 | -0.65809900 | -1.05476700 |
| F | 3.54361800  | -0.33180200 | 0.95933200  |
| F | 3.83538000  | 0.98773300  | -0.88685000 |
| F | 3.14586200  | -1.17729100 | -1.13569400 |

**1'•BPh<sub>3</sub> (R = H, R' = OMe)**

E(SMD/M06-2X/6-31G(d)) = -1326.932936 au

H(SMD/M06-2X/6-31G(d)) = -1326.465611 au

G(SMD/M06-2X/6-31G(d)) = -1326.557785 au

E(SMD/M06-2X/def2-TZVP//SMD/M06-2X/6-31G(d)) = -1327.428966 au

|   |             |             |             |
|---|-------------|-------------|-------------|
| C | -2.31717900 | 0.36361000  | 0.18672500  |
| N | -1.69566800 | 2.11967800  | -0.52723900 |
| N | -1.38997300 | 3.17498400  | -0.49404000 |
| C | -3.64986200 | 0.17448400  | -0.27956700 |
| C | -3.93248300 | -0.66393700 | -1.38222100 |
| C | -4.71192300 | 0.79294800  | 0.41573900  |
| C | -5.24601100 | -0.89381300 | -1.75925800 |
| H | -3.11026100 | -1.13000700 | -1.91870400 |
| C | -6.02136100 | 0.57983700  | 0.01704200  |
| H | -4.47932400 | 1.43055200  | 1.26333300  |
| C | -6.28364800 | -0.26644800 | -1.06414800 |
| H | -5.46850300 | -1.54801400 | -2.59553100 |
| H | -6.83987700 | 1.05606900  | 0.54601400  |
| C | -1.12843200 | -0.34790600 | -0.04173700 |
| O | -0.11174800 | 0.13805600  | -0.62557500 |
| O | -1.00117200 | -1.54329800 | 0.50616300  |
| C | -1.95396200 | -2.00755000 | 1.47546600  |
| H | -2.12063200 | -1.23278800 | 2.22934400  |
| H | -2.89434600 | -2.28355100 | 0.99301900  |
| H | -1.49482500 | -2.88481300 | 1.92846000  |
| B | 1.37963800  | -0.04448400 | -0.08077900 |
| H | -7.31147200 | -0.44060300 | -1.36854700 |
| C | 2.02830000  | -1.33993000 | -0.80038300 |
| C | 3.37976000  | -1.65911000 | -0.58240800 |
| C | 1.31998900  | -2.17684300 | -1.67300600 |
| C | 3.98912400  | -2.75580300 | -1.18760200 |
| H | 3.97252500  | -1.02894500 | 0.08021500  |
| C | 1.91847000  | -3.27547900 | -2.29316000 |
| H | 0.27258200  | -1.96707800 | -1.87903600 |
| C | 3.25695100  | -3.57251700 | -2.05016400 |
| H | 5.03604200  | -2.97274900 | -0.99118600 |
| H | 1.33715200  | -3.90079800 | -2.96634900 |
| H | 3.72684900  | -4.42734300 | -2.52856900 |
| C | 1.26703300  | -0.13119500 | 1.54013400  |
| C | 0.67892500  | 0.93828400  | 2.23840800  |
| C | 1.66561700  | -1.23689300 | 2.30326800  |
| C | 0.48990100  | 0.90779100  | 3.61924100  |
| H | 0.36343300  | 1.82158800  | 1.68197500  |
| C | 1.49374200  | -1.27818900 | 3.68812700  |

|   |            |             |             |
|---|------------|-------------|-------------|
| H | 2.11276800 | -2.09332700 | 1.80269300  |
| C | 0.90091000 | -0.20582800 | 4.35180800  |
| H | 0.02895900 | 1.75226700  | 4.12533600  |
| H | 1.81766200 | -2.15126900 | 4.24907900  |
| H | 0.76227100 | -0.23528400 | 5.42907300  |
| C | 2.10287000 | 1.32771300  | -0.56398600 |
| C | 3.20429700 | 1.85043300  | 0.13170300  |
| C | 1.69522800 | 2.02444400  | -1.71241500 |
| C | 3.87142200 | 2.99878100  | -0.29451400 |
| H | 3.54237200 | 1.35310900  | 1.03971500  |
| C | 2.34626700 | 3.17956600  | -2.14526900 |
| H | 0.84257700 | 1.65577400  | -2.27954000 |
| C | 3.44193600 | 3.67140000  | -1.43716400 |
| H | 4.72105500 | 3.37431700  | 0.27019800  |
| H | 1.99964100 | 3.69685200  | -3.03656800 |
| H | 3.95272700 | 4.57066100  | -1.77023400 |

**1a•BCl<sub>3</sub>** (R = H, R' = OMe)

E(SMD/M06-2X/6-31G(d)) = -1903.420534 au

H(SMD/M06-2X/6-31G(d)) = -1903.245078 au

G(SMD/M06-2X/6-31G(d)) = -1903.307661 au

E(SMD/M06-2X/def2-TZVP//SMD/M06-2X/6-31G(d)) = -1903.723597 au

|    |             |             |             |
|----|-------------|-------------|-------------|
| C  | 1.05845000  | 0.64805200  | -0.61364800 |
| C  | 2.28274600  | 0.13224300  | -0.32504200 |
| C  | 3.32731900  | 0.16293500  | -1.30629000 |
| C  | 2.53314100  | -0.44469100 | 0.96477500  |
| C  | 4.56319200  | -0.35956100 | -1.00223000 |
| H  | 3.11432400  | 0.60247300  | -2.27529800 |
| C  | 3.77516400  | -0.96392500 | 1.24861900  |
| H  | 1.72415700  | -0.46249000 | 1.68865000  |
| C  | 4.77837900  | -0.91804900 | 0.26773300  |
| H  | 5.36619200  | -0.34596700 | -1.73034800 |
| H  | 3.98296300  | -1.40697500 | 2.21595800  |
| C  | -0.23089500 | 0.97769000  | -0.53093400 |
| O  | -1.11691400 | 0.11416500  | -0.99427600 |
| O  | -0.68619800 | 2.15348000  | -0.13186000 |
| C  | 0.29181800  | 3.02385300  | 0.45138300  |
| H  | 0.71831300  | 2.56088200  | 1.34626800  |
| H  | 1.07964500  | 3.24475100  | -0.27743500 |
| H  | -0.23806600 | 3.93691600  | 0.71508700  |
| B  | -2.14182400 | -0.45515500 | -0.11183700 |
| H  | 5.75608200  | -1.33121700 | 0.49922800  |
| Cl | -1.44202600 | -0.68851500 | 1.61669600  |
| Cl | -2.60609500 | -2.09862400 | -0.84631000 |
| Cl | -3.63690700 | 0.65684300  | -0.03744600 |



**1a•BH<sub>3</sub> (R = H, R' = OMe)**

E(SMD/M06-2X/6-31G(d)) = -524.5376283 au

H(SMD/M06-2X/6-31G(d)) = -524.343022 au

G(SMD/M06-2X/6-31G(d)) = -524.395153 au

E(SMD/M06-2X/def2-TZVP//SMD/M06-2X /6-31G(d)) = -524.7417497 au

|   |             |             |             |
|---|-------------|-------------|-------------|
| C | -0.40006500 | 0.44190400  | 0.86645800  |
| C | 0.87644200  | 0.12462400  | 0.39943400  |
| C | 1.10781600  | -0.62632500 | -0.79362000 |
| C | 1.99629800  | 0.58140400  | 1.15342700  |
| C | 2.39564600  | -0.89862700 | -1.20459300 |
| H | 0.25652200  | -0.98234400 | -1.36836400 |
| C | 3.28303400  | 0.30408600  | 0.73536300  |
| H | 1.80364000  | 1.14901600  | 2.05831500  |
| C | 3.47464700  | -0.43207100 | -0.43952000 |
| H | 2.57937900  | -1.46762600 | -2.10931100 |
| H | 4.13835500  | 0.64934100  | 1.30545600  |
| C | -1.61091500 | 0.00467200  | 0.26235200  |
| O | -2.06377500 | -1.13382200 | 0.56124000  |
| O | -2.34579000 | 0.82413100  | -0.45348300 |
| C | -1.76210500 | 2.09469300  | -0.79469600 |
| H | -1.43703000 | 2.61156000  | 0.11328900  |
| H | -0.92145700 | 1.95117700  | -1.47743200 |
| H | -2.55231100 | 2.65776100  | -1.28713900 |
| B | -3.53595700 | -1.58512300 | 0.22112300  |
| H | 4.48700700  | -0.64900200 | -0.76838300 |
| H | -4.29500400 | -0.79277500 | 0.74243100  |
| H | -3.61760000 | -2.69364700 | 0.70450400  |
| H | -3.64998500 | -1.59647600 | -0.98866600 |

**1a•BF<sub>3</sub> (R = H, R' = OMe)**

E(SMD/M06-2X/6-31G(d)) = -822.3995429 au

H(SMD/M06-2X/6-31G(d)) = -822.220836 au

G(SMD/M06-2X/6-31G(d)) = -822.279425 au

E(SMD/M06-2X/def2-TZVP//SMD/M06-2X /6-31G(d)) = -822.7549344 au

|   |             |             |             |
|---|-------------|-------------|-------------|
| C | 0.56095600  | 0.55192300  | 0.84603700  |
| C | 1.79428600  | 0.09829200  | 0.39826100  |
| C | 1.97220100  | -0.51108300 | -0.88323300 |
| C | 2.92476800  | 0.25015500  | 1.25558400  |
| C | 3.21993800  | -0.94302300 | -1.27782000 |
| H | 1.11001600  | -0.62965000 | -1.53419600 |
| C | 4.16943100  | -0.18937200 | 0.85284700  |
| H | 2.77245800  | 0.71485700  | 2.22455300  |
| C | 4.30924400  | -0.78137000 | -0.40859400 |
| H | 3.36462000  | -1.40659200 | -2.24737600 |
| H | 5.03254100  | -0.08109200 | 1.49996500  |
| C | -0.69076800 | 0.44523500  | 0.21561700  |
| O | -1.38472500 | -0.60536300 | 0.40302900  |
| O | -1.23065300 | 1.46259500  | -0.41212600 |
| C | -0.39458100 | 2.61630600  | -0.61773600 |
| H | -0.01329200 | 2.97293100  | 0.34395700  |

|   |             |             |             |
|---|-------------|-------------|-------------|
| H | 0.42942600  | 2.36844800  | -1.29049900 |
| H | -1.03780800 | 3.36721300  | -1.07153300 |
| B | -2.90515300 | -0.66832200 | 0.08076500  |
| H | 5.28972900  | -1.12665200 | -0.72411700 |
| F | -3.52378400 | 0.32837600  | 0.80449200  |
| F | -3.27757300 | -1.92639800 | 0.49567400  |
| F | -3.05328200 | -0.50398800 | -1.27989700 |

**1a•BPh<sub>3</sub>** (R = H, R' = OMe)

E(SMD/M06-2X/6-31G(d)) = -1217.459414 au

H(SMD/M06-2X/6-31G(d)) = -1217.001898 au

G(SMD/M06-2X/6-31G(d)) = -1217.089912 au

E(SMD/M06-2X/def2-TZVP//SMD/M06-2X/6-31G(d)) = -1217.911774 au

|   |             |             |             |
|---|-------------|-------------|-------------|
| C | 2.44936800  | -1.04230700 | -0.57900900 |
| C | 3.63551500  | -0.32155700 | -0.45618800 |
| C | 3.80237400  | 0.74358600  | 0.48147200  |
| C | 4.72656400  | -0.67085200 | -1.30444400 |
| C | 5.00226700  | 1.41763500  | 0.56097800  |
| H | 2.96849900  | 1.01443200  | 1.12459100  |
| C | 5.92477400  | 0.01041800  | -1.21903300 |
| H | 4.58416200  | -1.48102400 | -2.01249400 |
| C | 6.05549000  | 1.04783200  | -0.28841700 |
| H | 5.13654900  | 2.22724100  | 1.26983700  |
| H | 6.75795800  | -0.24995300 | -1.86216600 |
| C | 1.24071600  | -0.79761500 | 0.11282700  |
| O | 0.44789600  | 0.07536900  | -0.34949300 |
| O | 0.85373400  | -1.56377400 | 1.10484300  |
| C | 1.80690200  | -2.52267600 | 1.59618400  |
| H | 2.15803900  | -3.15249700 | 0.77321400  |
| H | 2.64547300  | -2.00870200 | 2.07206400  |
| H | 1.26919900  | -3.12208000 | 2.32809300  |
| B | -1.12674400 | 0.11173300  | -0.08685400 |
| H | 6.99851500  | 1.58287600  | -0.22190300 |
| C | -1.37738800 | 0.71140000  | 1.39856700  |
| C | -2.69571200 | 0.89770200  | 1.85053700  |
| C | -0.35695700 | 1.12660700  | 2.26407100  |
| C | -2.98197600 | 1.44586200  | 3.09844800  |
| H | -3.52200700 | 0.60601300  | 1.20269900  |
| C | -0.62689400 | 1.68419600  | 3.51542400  |
| H | 0.68282000  | 1.02056800  | 1.95917200  |
| C | -1.94300400 | 1.84276300  | 3.94102800  |
| H | -4.01499200 | 1.56894600  | 3.41358500  |
| H | 0.19279900  | 1.99583400  | 4.15809300  |
| H | -2.15864900 | 2.27436800  | 4.91441600  |
| C | -1.67752400 | -1.39503500 | -0.34348800 |
| C | -1.46094200 | -1.99473500 | -1.59647300 |
| C | -2.34150800 | -2.16953700 | 0.61719000  |
| C | -1.87940100 | -3.29365400 | -1.87848500 |
| H | -0.95108100 | -1.42479000 | -2.37269000 |
| C | -2.77704800 | -3.46788800 | 0.34669500  |

|   |             |             |             |
|---|-------------|-------------|-------------|
| H | -2.51639200 | -1.75355300 | 1.60708700  |
| C | -2.54606600 | -4.03647200 | -0.90397800 |
| H | -1.69200200 | -3.72588500 | -2.85820600 |
| H | -3.29246200 | -4.03812200 | 1.11553500  |
| H | -2.88111200 | -5.04762300 | -1.11842600 |
| C | -1.65668400 | 1.17031000  | -1.19828700 |
| C | -2.92732100 | 1.05617200  | -1.78155800 |
| C | -0.89453900 | 2.29243000  | -1.56065800 |
| C | -3.41817900 | 2.00939100  | -2.67505900 |
| H | -3.54807600 | 0.19558800  | -1.53728200 |
| C | -1.36711600 | 3.24718500  | -2.45907900 |
| H | 0.09655200  | 2.41921600  | -1.12860600 |
| C | -2.63672100 | 3.10980600  | -3.02035600 |
| H | -4.40839800 | 1.88876300  | -3.10719000 |
| H | -0.74746000 | 4.10115200  | -2.72144000 |
| H | -3.01119700 | 3.85200100  | -3.71996200 |

### BCl<sub>3</sub>

E(SMD/M06-2X/6-31G(d)) = -1405.461661 au

H(SMD/M06-2X/6-31G(d)) = -1405.448686 au

G(SMD/M06-2X/6-31G(d)) = -1405.483198 au

E(SMD/M06-2X/def2-TZVP//SMD/M06-2X /6-31G(d)) = -1405.575414 au

|    |             |             |             |
|----|-------------|-------------|-------------|
| B  | -0.00005100 | -0.00008200 | -0.00005700 |
| Cl | 1.47548100  | -0.93214800 | 0.00000600  |
| Cl | 0.06982500  | 1.74343300  | 0.00000600  |
| Cl | -1.54529100 | -0.81126000 | 0.00000600  |

### BH<sub>3</sub>

E(SMD/M06-2X/6-31G(d)) = -26.58533473 au

H(SMD/M06-2X/6-31G(d)) = -26.554763 au

G(SMD/M06-2X/6-31G(d)) = -26.577832 au

E(SMD/M06-2X/def2-TZVP//SMD/M06-2X /6-31G(d)) = -26.59541085 au

|   |             |             |             |
|---|-------------|-------------|-------------|
| B | 0.00005600  | 0.00000000  | 0.00001400  |
| H | -0.59587600 | -1.03096100 | -0.00002400 |
| H | -0.59525000 | 1.03132200  | -0.00002400 |
| H | 1.19084700  | -0.00036100 | -0.00002400 |

### BF<sub>3</sub>

E(SMD/M06-2X/6-31G(d)) = -324.4521062 au

H(SMD/M06-2X/6-31G(d)) = -324.435197 au

G(SMD/M06-2X/6-31G(d)) = -324.465829 au

E(SMD/M06-2X/def2-TZVP//SMD/M06-2X /6-31G(d)) = -324.6110106 au

|   |             |             |             |
|---|-------------|-------------|-------------|
| B | -0.00002800 | 0.00011400  | 0.00020600  |
| F | 1.09783800  | 0.72382900  | -0.00003800 |
| F | -1.17591700 | 0.58860200  | -0.00003800 |
| F | 0.07809500  | -1.31249400 | -0.00003800 |

### BPh<sub>3</sub>

E(SMD/M06-2X/6-31G(d)) = -719.5320178 au

H(SMD/M06-2X/6-31G(d)) = -719.235809 au  
 G(SMD/M06-2X/6-31G(d)) = -719.295326 au  
 E(SMD/M06-2X/def2-TZVP//SMD/M06-2X /6-31G(d)) = -719.790855 au

|   |             |             |             |
|---|-------------|-------------|-------------|
| B | 0.00010100  | -0.00026400 | -0.00000400 |
| C | -0.61991400 | 1.44032100  | 0.00030800  |
| C | 0.02242600  | 2.51306200  | -0.64525700 |
| C | -1.84074300 | 1.71107300  | 0.64558700  |
| C | -0.53187900 | 3.79027100  | -0.66034600 |
| H | 0.96705100  | 2.33848100  | -1.15466300 |
| C | -2.38805600 | 2.99129100  | 0.65963300  |
| H | -2.36305700 | 0.90510100  | 1.15537300  |
| C | -1.73629900 | 4.03215200  | -0.00070100 |
| H | -0.02405000 | 4.59789200  | -1.17957100 |
| H | -3.32392000 | 3.17746800  | 1.17849200  |
| H | -2.16619400 | 5.02982200  | -0.00127500 |
| C | -0.93737500 | -1.25752100 | -0.00022800 |
| C | -0.56042900 | -2.45106200 | 0.64285700  |
| C | -2.18889900 | -1.23649400 | -0.64326000 |
| C | -1.39595600 | -3.56475100 | 0.65756700  |
| H | 0.39974500  | -2.50120300 | 1.15062400  |
| C | -3.01843900 | -2.35464400 | -0.65753400 |
| H | -2.51074700 | -0.33042400 | -1.15094100 |
| C | -2.62477400 | -3.51944400 | 0.00011200  |
| H | -1.08853100 | -4.46909200 | 1.17466600  |
| H | -3.97298200 | -2.31773100 | -1.17446200 |
| H | -3.27432400 | -4.39018700 | 0.00034400  |
| C | 1.55775400  | -0.18329700 | -0.00007500 |
| C | 2.16607400  | -1.27567000 | -0.64566700 |
| C | 2.40218100  | 0.73865400  | 0.64572600  |
| C | 3.54934700  | -1.43419300 | -0.65993200 |
| H | 1.54291400  | -2.00641700 | -1.15555300 |
| C | 3.78453600  | 0.57255200  | 0.66066400  |
| H | 1.96490200  | 1.59378300  | 1.15545500  |
| C | 4.36054800  | -0.51223300 | 0.00051700  |
| H | 3.99519800  | -2.27763600 | -1.17912300 |
| H | 4.41334800  | 1.28987100  | 1.18007100  |
| H | 5.43951700  | -0.63880300 | 0.00075800  |
